# Supplementary material
Source: PubMed Central journal article supplement (PMC4549775)
Supplement: NIHMS664248-supplement-1.pdf [file NIHMS664248-supplement-1.pdf]

# Genome-wide association analysis of more than 120,000 individuals identifies 15 new susceptibility loci for breast cancer

Kyriaki Michailidou<sup>1</sup>, Jonathan Beesley<sup>2</sup>, Sara Lindstrom<sup>3</sup>, Sander Canisius<sup>4</sup>, Joe Dennis<sup>1</sup>, Michael Lush<sup>1</sup>, Mel J Maranian<sup>5</sup>, Manjeet K Bolla<sup>1</sup>, Qin Wang<sup>1</sup>, Mitul Shah<sup>5</sup>, Barbara J Perkins<sup>5</sup>, Kamila Czene<sup>6</sup>, Mikael Eriksson<sup>6</sup>, Hatef Darabi<sup>6</sup>, Judith S Brand<sup>6</sup>, Stig E Bojesen<sup>7-9</sup>, Børge G Nordestgaard<sup>7-9</sup>, Henrik Flyger<sup>10</sup>, Sune F Nielsen<sup>7,8</sup>, Nazneen Rahman<sup>11</sup>, Clare Turnbull<sup>11</sup>, BOCS<sup>12</sup>, Olivia Fletcher<sup>13</sup>, Julian Peto<sup>14</sup>, Lorna Gibson<sup>14</sup>, Isabel dos-Santos-Silva<sup>14</sup>, Jenny Chang-Claude<sup>15</sup>, Dieter Flesch-Janys<sup>16,17</sup>, Anja Rudolph<sup>15</sup>, Ursula Eilber<sup>15</sup>, Sabine Behrens<sup>15</sup>, Heli Nevanlinna<sup>18</sup>, Taru A Muranen<sup>18</sup>, Kristiina Aittomäki<sup>19</sup>, Carl Blomqvist<sup>20</sup>, Sofia Khan<sup>18</sup>, Kirsimari Aaltonen<sup>18</sup>, Habibul Ahsan<sup>21-25</sup>, Muhammad G Kibriya<sup>21,22</sup>, Alice S Whittemore<sup>26,27</sup>, Esther M John<sup>26-28</sup>, Kathleen E Malone<sup>29</sup>, Marilie D Gammon<sup>30</sup>, Regina M Santella<sup>31</sup>, Giske Ursin<sup>32</sup>, Enes Makalic<sup>33</sup>, Daniel F Schmidt<sup>33</sup>, Graham Casey<sup>34</sup>, David J Hunter<sup>3</sup>, Susan M Gapstur<sup>35</sup>, Mia M Gaudet<sup>35</sup>, W Ryan Diver<sup>35</sup>, Christopher A Haiman<sup>34</sup>, Fredrick Schumacher<sup>34</sup>, Brian E Henderson<sup>34</sup>, Loic Le Marchand<sup>36</sup>, Christine D Berg<sup>37</sup>, Stephen Chanock<sup>38</sup>, Jonine Figueroa<sup>38</sup>, Robert N Hoover<sup>38</sup>, Diether Lambrechts<sup>39,40</sup>, Patrick Neven<sup>41</sup>, Hans Wildiers<sup>41</sup>, Erik van Limbergen<sup>41</sup>, Marjanka K Schmidt<sup>42</sup>, Annegien Broeks<sup>42</sup>, Senno Verhoef<sup>42</sup>, Sten Cornelissen<sup>42</sup>, Fergus J Couch<sup>43</sup>, Janet E Olson<sup>44</sup>, Emily Hallberg<sup>44</sup>, Celine Vachon<sup>44</sup>, Quinten Waisfisz<sup>45</sup>, Hanne Meijers-Heijboer<sup>45</sup>, Muriel A Adank<sup>45</sup>, Rob B van der Luijt<sup>46</sup>, Jingmei Li<sup>6</sup>, Jianjun Liu<sup>47</sup>, Keith Humphreys<sup>6</sup>, Daehee Kang<sup>48-50</sup>, Ji-Yeob Choi<sup>49,50</sup>, Sue K Park<sup>48-50</sup>, Keun-Young Yoo<sup>51</sup>, Keitaro Matsuo<sup>52</sup>, Hidemi Ito<sup>53</sup>, Hiroji Iwata<sup>54</sup>, Kazuo Tajima<sup>55</sup>, Pascal Guénel<sup>56,57</sup>, Thérèse Truong<sup>56,57</sup>, Claire Mulot<sup>58</sup>, Marie Sanchez<sup>56,57</sup>, Barbara Burwinkel<sup>59,60</sup>, Frederik Marme<sup>59,61</sup>, Harald Surowy<sup>59,60</sup>, Christof Sohn<sup>59</sup>, Anna H Wu<sup>34</sup>, Chiu-chen Tseng<sup>34</sup>, David Van Den Berg<sup>34</sup>, Daniel O Stram<sup>34</sup>, Anna González-Neira<sup>62</sup>, Javier Benitez<sup>62,63</sup>, M Pilar Zamora<sup>64</sup>, Jose Ignacio Arias Perez<sup>65</sup>, Xiao-Ou Shu<sup>66</sup>, Wei Lu<sup>67</sup>, Yu-Tang Gao<sup>68</sup>, Hui Cai<sup>66</sup>, Angela Cox<sup>69,70</sup>, Simon S Cross<sup>71</sup>, Malcolm WR Reed<sup>69,70</sup>, Irene L Andrulis<sup>72,73</sup>, Julia A Knight<sup>74,75</sup>, Gord Glendon<sup>72</sup>, Anna Marie Mulligan<sup>76,77</sup>, Elinor J Sawyer<sup>78</sup>, Ian Tomlinson<sup>79,80</sup>, Michael J Kerin<sup>81</sup>, Nicola Miller<sup>81</sup>, kConFab investigators<sup>12</sup>, AOCS Group<sup>12</sup>, Annika Lindblom<sup>82</sup>, Sara Margolin<sup>83</sup>, Soo Hwang Teo<sup>84,85</sup>, Cheng Har Yip<sup>85</sup>, Nur Aishah Mohd Taib<sup>85</sup>, Gie-Hooi TAN<sup>85</sup>, Maartje J Hooning<sup>86</sup>, Antoinette Hollestelle<sup>86</sup>, John WM Martens<sup>86</sup>, J Margriet Collée<sup>87</sup>, William Blot<sup>66,88</sup>, Lisa B Signorello<sup>89</sup>, Qiuyin Cai<sup>66</sup>, John L Hopper<sup>90</sup>, Melissa C Southey<sup>91</sup>, Helen Tsimiklis<sup>91</sup>, Carmel Apicella<sup>90</sup>, Chen-Yang Shen<sup>92-94</sup>, Chia-Ni Hsiung<sup>93</sup>, Pei-Ei Wu<sup>92,93</sup>, Ming-Feng Hou<sup>95,96</sup>, Vessela N Kristensen<sup>97-99</sup>, Silje Nord<sup>97</sup>, Grethe I Grenaker Alnaes<sup>97</sup>, NBCS<sup>12</sup>, Graham G Giles<sup>90,100</sup>, Roger L Milne<sup>90,100</sup>, Catriona McLean<sup>101</sup>, Federico Canzian<sup>102</sup>, Dimitrios Trichopoulos<sup>89,103</sup>, Petra Peeters<sup>104,105</sup>, Eiliv Lund<sup>106</sup>, Malin Sund<sup>107</sup>, Kay-Tee Khaw<sup>108</sup>, Marc J Gunter<sup>105</sup>, Domenico Palli<sup>109</sup>, Lotte Maxild Mortensen<sup>110</sup>, Laure Dossus<sup>111,112</sup>, Jose-Maria Huerta<sup>113</sup>, Alfons Meindl<sup>114</sup>, Rita K Schmutzler<sup>115-117</sup>, Christian Sutter<sup>118</sup>, Rongxi Yang<sup>59,60</sup>, Kenneth Muir<sup>119,120</sup>, Artitaya Lophatananon<sup>119</sup>, Sarah Stewart-Brown<sup>119</sup>, Pornthep Siriwanarangsarn<sup>121</sup>, Mikael Hartman<sup>122,123</sup>, Hui Miao<sup>123</sup>, Kee Seng Chia<sup>123</sup>, Ching Wan Chan<sup>124</sup>, Peter A Fasching<sup>125,126</sup>, Alexander Hein<sup>125</sup>, Matthias W Beckmann<sup>125</sup>, Lothar Haeberle<sup>125</sup>, Hermann Brenner<sup>127,128</sup>, Aida Karina Dieffenbach<sup>127,128</sup>, Volker Arndt<sup>127</sup>, Christa Stegmaier<sup>129</sup>, Alan Ashworth<sup>13</sup>, Nick Orr<sup>13</sup>, Minouk J Schoemaker<sup>11</sup>, Anthony J Swerdlow<sup>11,130</sup>, Louise Brinton<sup>38</sup>, Montserrat Garcia-Closas<sup>11,13</sup>, Wei Zheng<sup>66</sup>, Sandra L Halverson<sup>66</sup>, Martha Shrubsole<sup>66</sup>, Jirong Long<sup>66</sup>, Mark S Goldberg<sup>131,132</sup>, France Labrèche<sup>133,134</sup>, Martine Dumont<sup>135,136</sup>, Robert Winqvist<sup>137</sup>, Katri Pylkäs<sup>137</sup>, Arja Jukkola-Vuorinen<sup>138</sup>, Mervi Grip<sup>139</sup>, Hiltrud Brauch<sup>128,140-142</sup>, Ute Hamann<sup>143</sup>, Thomas Brüning<sup>144</sup>, The GENICA Network<sup>12</sup>, Paolo Radice<sup>145</sup>, Paolo Peterlongo<sup>146</sup>, Siranoush Manoukian<sup>147</sup>, Loris Bernard<sup>148,149</sup>, Natalia V Bogdanova<sup>150</sup>, Thilo Dörk<sup>151</sup>, Arto Mannermaa<sup>152-154</sup>, Vesa Kataja<sup>155,156</sup>, Veli-Matti Kosma<sup>152-154</sup>, Jaana M Hartikainen<sup>152-154</sup>, Peter Devilee<sup>157</sup>, Robert AEM Tollenaar<sup>158</sup>, Caroline Seynaeve<sup>159</sup>, Christi J Van Asperen<sup>160</sup>, Anna Jakubowska<sup>161</sup>, Jan Lubinski<sup>161</sup>, Katarzyna Jaworska<sup>161</sup>, Tomasz Huzarski<sup>161</sup>, Suleeporn Sangrajrang<sup>162</sup>, Valerie Gaborieau<sup>163</sup>, Paul Brennan<sup>163</sup>, James McKay<sup>163</sup>, Susan Slager<sup>44</sup>, Amanda E Toland<sup>164</sup>, Christine B Ambrosone<sup>165</sup>, Drakoulis Yannoukakos<sup>166</sup>, Maria Kabisch<sup>143</sup>, Diana Torres<sup>143,167</sup>, Susan L Neuhausen<sup>168</sup>, Hoda Anton-Culver<sup>169</sup>, Craig Luccarini<sup>5</sup>, Caroline Baynes<sup>5</sup>, Shahana Ahmed<sup>5</sup>, Catherine S Healey<sup>5</sup>, Daniel C Tessier<sup>170</sup>, Daniel Vincent<sup>170</sup>, Francois Bacot<sup>170</sup>, Guillermo Pita<sup>62</sup>, M Rosario Alonso<sup>62</sup>, Nuria Álvarez<sup>62</sup>, Daniel Herrero<sup>62</sup>, Jacques Simard<sup>135,136</sup>, Paul PDP Pharoah<sup>1,5</sup>, Peter Kraft<sup>3</sup>, Alison M Dunning<sup>5</sup>, Georgia Chenevix-Trench<sup>2</sup>, Per Hall<sup>6</sup>, Douglas F Easton<sup>1,5</sup>

1. Centre for Cancer Genetic Epidemiology, Department of Public Health and Primary Care, University of Cambridge, Cambridge, UK.
2. Department of Genetics, QIMR (Queensland Institute for Medical Research) Berghofer Medical Research Institute, Brisbane, Queensland, Australia.
3. Program in Genetic Epidemiology and Statistical Genetics, Harvard School of Public Health, Boston, MA, USA.

4. Division of Molecular Carcinogenesis, Netherlands Cancer Institute, Antoni van Leeuwenhoek Hospital, Amsterdam, The Netherlands.
5. Centre for Cancer Genetic Epidemiology, Department of Oncology, University of Cambridge, Cambridge, UK.
6. Department of Medical Epidemiology and Biostatistics, Karolinska Institutet, Stockholm, Sweden.
7. Copenhagen General Population Study, Herlev Hospital, Copenhagen University Hospital, Herlev, Denmark.
8. Department of Clinical Biochemistry, Herlev Hospital, Copenhagen University Hospital, Herlev, Denmark.
9. Faculty of Health and Medical Sciences, University of Copenhagen, Copenhagen, Denmark.
10. Department of Breast Surgery, Herlev Hospital, Copenhagen University Hospital, Herlev, Denmark.
11. Division of Genetics and Epidemiology, Institute of Cancer Research, London, UK.
12. A full list of members and affiliations appears in the Supplementary Note.
13. Breakthrough Breast Cancer Research Centre, The Institute of Cancer Research, London, UK.
14. Department of Non-Communicable Disease Epidemiology, London School of Hygiene and Tropical Medicine, London, UK.
15. Division of Cancer Epidemiology, German Cancer Research Center (DKFZ), Heidelberg, Germany.
16. Department of Cancer Epidemiology/Clinical Cancer Registry, University Clinic Hamburg-Eppendorf, Hamburg, Germany.
17. Institute for Medical Biometrics and Epidemiology, University Clinic Hamburg-Eppendorf, Hamburg, Germany.
18. Department of Obstetrics and Gynecology, University of Helsinki and Helsinki University Central Hospital, Helsinki, Finland.
19. Department of Clinical Genetics, Helsinki University Central Hospital, Helsinki, Finland.
20. Department of Oncology, University of Helsinki and Helsinki University Central Hospital, Helsinki, Finland.
21. Center for Cancer Epidemiology and Prevention, University of Chicago, Chicago, Illinois; .
22. Department of Health Studies, University of Chicago, Chicago, Illinois; .
23. Department of Medicine, University of Chicago, Chicago, Illinois.
24. Department of Human Genetics, University of Chicago, Chicago, Illinois.
25. Comprehensive Cancer Center, University of Chicago, Chicago, Illinois; .
26. Department of Health Research and Policy - Epidemiology, Stanford University School of Medicine, Stanford, CA, USA.
27. Stanford Cancer Institute, Stanford University School of Medicine, Stanford, CA, USA.
28. Department of Epidemiology, Cancer Prevention Institute of California, Fremont, CA, USA
  
29. Division of Public Health Sciences, Fred Hutchinson Cancer Research Center, Seattle, Washington.
30. Department of Epidemiology, University of North Carolina at Chapel Hill, Chapel Hill, North Carolina.
31. Department of Environmental Health Sciences, Columbia University Mailman School of Public Health, New York, New York.
32. Norway Cancer Registry, Norway.
33. Centre for Molecular, Environmental, Genetic, and Analytic Epidemiology, Melbourne School of Population Health, Melbourne, Australia.
34. Department of Preventive Medicine, Keck School of Medicine, University of Southern California, Los Angeles, CA, USA.
35. Epidemiology Research Program, American Cancer Society, Atlanta, Georgia, USA.
36. Epidemiology Program, University of Hawaii Cancer Center, Honolulu, Hawaii, USA.
37. Department of Radiation Oncology and Molecular Radiation Sciences, Johns Hopkins Medicine, Baltimore, MD, USA.
38. Division of Cancer Epidemiology and Genetics, National Cancer Institute, Rockville, MD, USA.
39. Vesalius Research Center, VIB, Leuven, Belgium.
40. Laboratory for Translational Genetics, Department of Oncology, University of Leuven, Leuven, Belgium.
41. Multidisciplinary Breast Center, University Hospitals Leuven, Leuven, Belgium.
42. Netherlands Cancer Institute, Antoni van Leeuwenhoek hospital, Amsterdam, The Netherlands.
43. Department of Laboratory Medicine and Pathology, Mayo Clinic, Rochester, MN, USA.
44. Department of Health Sciences Research, Mayo Clinic, Rochester, MN, USA.
45. Department of Clinical Genetics, VU University Medical Center, section Oncogenetics, Amsterdam, The Netherlands.
46. Division of Biomedical Genetics, University Medical Center Utrecht, Utrecht, The Netherlands.
47. Human Genetics Division, Genome Institute of Singapore, Singapore.

48. Department of Preventive Medicine, Seoul National University College of Medicine, Seoul, Korea.
49. Department of Biomedical Sciences, Seoul National University Graduate School, Seoul, Korea.
50. Cancer Research Institute, Seoul National University, Seoul, Korea.
51. Seoul National University College of Medicine, Seoul, Korea.
52. Department of Preventive Medicine, Kyushu University Faculty of Medical Sciences, Fukuoka, Japan.
53. Division of Epidemiology and Prevention, Aichi Cancer Center Research Institute, Nagoya, Aichi, Japan.
54. Department of Breast Oncology, Aichi Cancer Center Hospital, Nagoya, Japan.
55. Epidemiology Center for Disease Control and Prevention, Mie University Hospital, Tsu, Mie, Japan.
56. Inserm (National Institute of Health and Medical Research), CESP (Center for Research in Epidemiology and Population Health), U1018, Environmental Epidemiology of Cancer, 94807 Villejuif, France.
57. University Paris-Sud, UMRS 1018, 94807 Villejuif, France.
58. Université Paris Sorbonne Cité, UMR-S775 Inserm, Paris, France.
59. Department of Obstetrics and Gynecology, University of Heidelberg, Heidelberg, Germany.
60. Molecular Epidemiology Group, German Cancer Research Center (DKFZ), Heidelberg, Germany.
61. National Center for Tumor Diseases, University of Heidelberg, Heidelberg, Germany.
62. Human Genotyping-CEGEN Unit, Human Cancer Genetics Program, Spanish National Cancer Research Centre (CNIO), Madrid, Spain.
63. Centro de Investigación en Red de Enfermedades Raras (CIBERER), Valencia, Spain.
64. Servicio de Oncología Médica, Hospital Universitario La Paz, Madrid, Spain.
65. Servicio de Cirugía General y Especialidades, Hospital Monte Naranco, Oviedo, Spain.
66. Division of Epidemiology, Department of Medicine, Vanderbilt Epidemiology Center and Vanderbilt-Ingram Cancer Center, Vanderbilt University School of Medicine, Nashville, TN, USA.
67. Shanghai Center for Disease Control and Prevention, Changning, Shanghai, China.
68. Department of Epidemiology, Shanghai Cancer Institute, Shanghai, China.
69. Sheffield Cancer Research Centre, University of Sheffield, Sheffield, UK.
70. Department of Oncology, University of Sheffield, Sheffield, UK.
71. Academic Unit of Pathology, Department of Neuroscience, University of Sheffield, Sheffield, UK.
72. Lunenfeld-Tanenbaum Research Institute of Mount Sinai Hospital, Toronto, ON, Canada.
73. Department of Molecular Genetics, University of Toronto, Toronto, ON, Canada.
74. Prosserman Centre for Health Research, Lunenfeld-Tanenbaum Research Institute of Mount Sinai Hospital, Toronto, ON, Canada.
75. Division of Epidemiology, Dalla Lana School of Public Health, University of Toronto, Toronto, ON, Canada.
76. Department of Laboratory Medicine and Pathobiology, University of Toronto, Toronto, ON, Canada.
77. Laboratory Medicine Program, University Health Network, Toronto, ON, Canada.
78. Research Oncology, Division of Cancer Studies, King's College London, Guy's Hospital, London, UK.
79. Wellcome Trust Centre for Human Genetics, University of Oxford, UK.
80. Oxford Biomedical Research Centre, University of Oxford, UK.
81. Surgery, School of Medicine, National University of Ireland, Galway.
82. Department of Molecular Medicine and Surgery, Karolinska Institutet, Stockholm, Sweden.
83. Department of Oncology - Pathology, Karolinska Institutet, Stockholm, Sweden.
84. Cancer Research Initiatives Foundation, Sime Darby Medical Centre, Subang Jaya, Malaysia.
85. Breast Cancer Research Unit, University Malaya Cancer Research Institute, University Malaya Medical Centre (UMMC), Kuala Lumpur, Malaysia.
86. Department of Medical Oncology, Erasmus MC Cancer Institute, 3008 AE Rotterdam, The Netherlands.
87. Department of Clinical Genetics, Erasmus University Medical Center, 3000 CA Rotterdam, The Netherlands.
88. International Epidemiology Institute, Rockville, MD, USA.
89. Department of Epidemiology, Harvard School of Public Health, Boston, MA, USA.
90. Centre for Epidemiology and Biostatistics, Melbourne School of Population and Global Health, The University of Melbourne, Melbourne, VIC, Australia.
91. Department of Pathology, The University of Melbourne, Melbourne, Australia.
92. Taiwan Biobank, Institute of Biomedical Sciences, Academia Sinica, Taipei, Taiwan.
93. Institute of Biomedical Sciences, Academia Sinica, Taipei, Taiwan.
94. School of Public Health, China Medical University, Taichung, Taiwan.
95. Cancer Center, Kaohsiung Medical University Chung-Ho Memorial Hospital, Kaohsiung, Taiwan.
96. Department of Surgery, Kaohsiung Medical University Chung-Ho Memorial Hospital, Kaohsiung, Taiwan.
97. Department of Genetics, Institute for Cancer Research, Oslo University Hospital, Radiumhospitalet, Oslo, Norway.

98. Institute of Clinical Medicine, University of Oslo (UiO), Oslo, Norway.
99. Department of Clinical Molecular Biology (EpiGen), University of Oslo (UiO), Oslo, Norway.
100. Cancer Epidemiology Centre, Cancer Council Victoria, Melbourne, VIC, Australia.
101. Anatomical Pathology, The Alfred Hospital, Melbourne, VIC, Australia.
102. Genomic Epidemiology Group, German Cancer Research Center (Deutsches Krebsforschungszentrum; DKFZ), Heidelberg, Germany.
103. Bureau of Epidemiologic Research, Academy of Athens, Athens, Greece; Hellenic Health Foundation, Athens, Greece.
104. Department of Epidemiology, Julius Center for Health Sciences and Primary Care, University Medical Center, Utrecht, The Netherlands.
105. Department of Epidemiology and Biostatistics, School of Public Health, Imperial College London, UK.
106. Department of Community Medicine, Faculty of Health Sciences, University of Tromsø - The Arctic University of Norway, Tromsø, Norway.
107. Department of Surgical and Perioperative Sciences, Umea University, Sweden.
108. School of Clinical Medicine, Cambridge Institute of Public Health, University of Cambridge, UK
109. Molecular and Nutritional Epidemiology Unit, Cancer Research and Prevention Institute, ISPO, Florence, Italy.
110. Section for Epidemiology, Aarhus University, Aarhus, Denmark.
111. Inserm Centre for research in Epidemiology and Population Health (CESP), U1018, Nutrition, Hormones and Women's Health team, Villejuif, France.
112. Univ Paris Sud, Villejuif, France.
113. Department of Epidemiology, Consejeria de Sanidad y Politica Social, CIBER de Epidemiologia y Salud Publica, Murcia, Spain.
114. Division of Gynaecology and Obstetrics, Technische Universität München, Munich, Germany
115. Center for Hereditary Breast and Ovarian Cancer, University Hospital Cologne, Cologne, Germany.
116. Center for Integrated Oncology (CIO), University Hospital Cologne, Cologne, Germany.
117. Center for Molecular Medicine Cologne (CMMC), Faculty of Medicine, University of Cologne, Cologne, Germany.
118. Institute of Human Genetics, University Hospital Heidelberg, Heidelberg, Germany.
119. Division of Health Sciences, Warwick Medical school, Warwick University, Coventry, UK.
120. Institute of Population Health, University of Manchester, Manchester, UK.
121. Ministry of Public Health, Nonthaburi, Thailand.
122. Department of Surgery, Yong Loo Lin School of Medicine, National University of Singapore and National University Health System, Singapore.
123. Saw Swee Hock School of Public Health, National University of Singapore and National University Health System, Singapore.
124. Division of General Surgery, National University Health System.
125. University Breast Center Franconia, Department of Gynecology and Obstetrics, University Hospital Erlangen, Friedrich-Alexander University Erlangen-Nuremberg, Comprehensive Cancer Center Erlangen-EMN, Erlangen, Germany.
126. University of California at Los Angeles, David Geffen School of Medicine, Department of Medicine, Division of Hematology and Oncology, Los Angeles, CA, USA.
127. Division of Clinical Epidemiology and Aging Research, German Cancer Research Center (DKFZ), Heidelberg, Germany.
128. German Cancer Consortium (DKTK), Heidelberg, Germany.
129. Saarland Cancer Registry, Saarbrücken, Germany.
130. Division of Breast Cancer Research, Institute of Cancer Research, London, UK.
131. Department of Medicine, McGill University, Montreal, QC, Canada.
132. Division of Clinical Epidemiology, McGill University Health Centre, Royal Victoria Hospital, Montreal, QC, Canada.
133. Département de Santé environnementale et santé au travail, École de santé publique, Université de Montréal, Montreal, Quebec, Canada.
134. Département de Médecine sociale et préventive, École de santé publique, Université de Montréal, Montreal, Quebec, Canada.
135. Centre Hospitalier Universitaire de Québec Research Center, Quebec City, Quebec, Canada.
136. Laval University, Quebec City, Quebec, Canada.

137. Laboratory of Cancer Genetics and Tumor Biology, Department of Clinical Chemistry and Biocenter Oulu, University of Oulu, NordLab Oulu/Oulu University Hospital, Oulu, Finland
138. Department of Oncology, Oulu University Hospital, University of Oulu, Oulu, Finland.
139. Department of Surgery, Oulu University Hospital, University of Oulu, Oulu, Finland.
140. Dr. Margarete Fischer-Bosch-Institute of Clinical Pharmacology, Stuttgart, Germany.
141. University of Tübingen, Tübingen, Germany.
142. German Cancer Research Center (DKFZ), Heidelberg, Germany.
143. Molecular Genetics of Breast Cancer, German Cancer Research Center (DKFZ), Heidelberg, Germany
144. Institute for Prevention and Occupational Medicine of the German Social Accident Insurance, Institute of the Ruhr University Bochum (IPA), Bochum, Germany.
145. Unit of Molecular Bases of Genetic Risk and Genetic Testing, Department of Preventive and Predictive Medicine, Fondazione IRCCS (Istituto di Ricovero e Cura a Carattere Scientifico) Istituto Nazionale Tumori (INT), Milan, Italy.
146. Fondazione Istituto FIRC (Italian Foundation for Cancer Research) di Oncologia Molecolare (IFOM), Milan, Italy.
147. Unit of Medical Genetics, Department of Preventive and Predictive Medicine, Fondazione IRCCS (Istituto di Ricovero e Cura a Carattere Scientifico) Istituto Nazionale Tumori (INT), Milan, Italy
148. Department of Experimental Oncology, Istituto Europeo di Oncologia, Milan, Italy.
149. Cogentech Cancer Genetic Test Laboratory, Milan, Italy.
150. Department of Radiation Oncology, Hannover Medical School, Hannover, Germany.
151. Gynaecology Research Unit, Hannover Medical School, Hannover, Germany.
152. School of Medicine, Institute of Clinical Medicine, Pathology and Forensic Medicine, University of Eastern Finland, Kuopio, Finland.
153. Cancer Center of Eastern Finland, University of Eastern Finland, Kuopio, Finland.
154. Imaging Center, Department of Clinical Pathology, Kuopio University Hospital, Kuopio, Finland.
155. Cancer Center, Kuopio University Hospital, Kuopio, Finland.
156. Central Finland Hospital District, Jyväskylä Central Hospital, Jyväskylä, Finland.
157. Department of Human Genetics and Department of Pathology, Leiden University Medical Center, Leiden, The Netherlands.
158. Department of Surgical Oncology, Leiden University Medical Center, Leiden, The Netherlands.
159. Department of Medical Oncology, Family Cancer Clinic, Erasmus MC Cancer Institute, Rotterdam, The Netherlands.
160. Department of Clinical Genetics, Leiden University Medical Center Leiden, The Netherlands.
161. Department of Genetics and Pathology, Pomeranian Medical University, Szczecin, Poland.
162. National Cancer Institute, Bangkok, Thailand.
163. International Agency for Research on Cancer, Lyon, France.
164. Department of Molecular Virology, Immunology and Medical Genetics, The Ohio State University, Columbus, OH, USA.
165. Roswell Park Cancer Institute, Buffalo, NY, USA.
166. Molecular Diagnostics Laboratory, IRRP, National Centre for Scientific Research "Demokritos", Aghia Paraskevi Attikis, Athens, Greece.
167. Institute of Human Genetics, Pontificia Universidad Javeriana, Bogota, Colombia.
168. Department of Population Sciences, Beckman Research Institute of City of Hope, Duarte, CA 91010, USA.
169. Department of Epidemiology, University of California Irvine, Irvine, CA, USA.
170. McGill University and Génome Québec Innovation Centre, Montréal, Québec, Canada.



## Supplementary Material

### Supplementary Figures

|                             |    |
|-----------------------------|----|
| Supplementary.Figure 1..... | 7  |
| Supplementary Figure 2..... | 9  |
| Supplementary Figure 3..... | 11 |
| Supplementary Figure 4..... | 13 |
| Supplementary Figure 5..... | 29 |
| Supplementary Figure 6..... | 31 |

### Supplementary Tables

|                            |    |
|----------------------------|----|
| Supplementary Table 1..... | 33 |
| Supplementary Table 2..... | 37 |
| Supplementary Table 3..... | 38 |
| Supplementary Table 4..... | 53 |
| Supplementary Table 5..... | 54 |
| Supplementary Table 6..... | 56 |
| Supplementary Table 7..... | 58 |
| Supplementary Table 8..... | 60 |
| Supplementary Table 9..... | 62 |

### Supplementary Note

|                                                                                                     |    |
|-----------------------------------------------------------------------------------------------------|----|
| Acknowledgments.....                                                                                | 64 |
| The Breast and Ovarian Cancer Susceptibility (BOCS) Study.....                                      | 70 |
| Kathleen Cuningham Foundation Consortium for research<br>into Familial Breast cancer (kConFab)..... | 70 |
| Australian Ovarian Cancer Study (AOCS Management Group).....                                        | 71 |
| The Genica Network.....                                                                             | 71 |
| The Norwegian Breast Cancer Study (NBCS).....                                                       | 71 |
| References.....                                                                                     | 72 |

**Supplementary Figure 1:** Manhattan Plots for the strength of genetic association ( $-\log_{10}P$ ) versus chromosomal position, where each dot represents a single variant. The association tests are from the meta-analysis of the GWAS and iCOGS datasets (see Online Methods). Variants within 500kb of variants previously established to be associated with breast cancer were removed (see text). Red horizontal line corresponds to the  $P=5 \times 10^{-8}$ , blue horizontal line corresponds to  $P=10^{-5}$ .

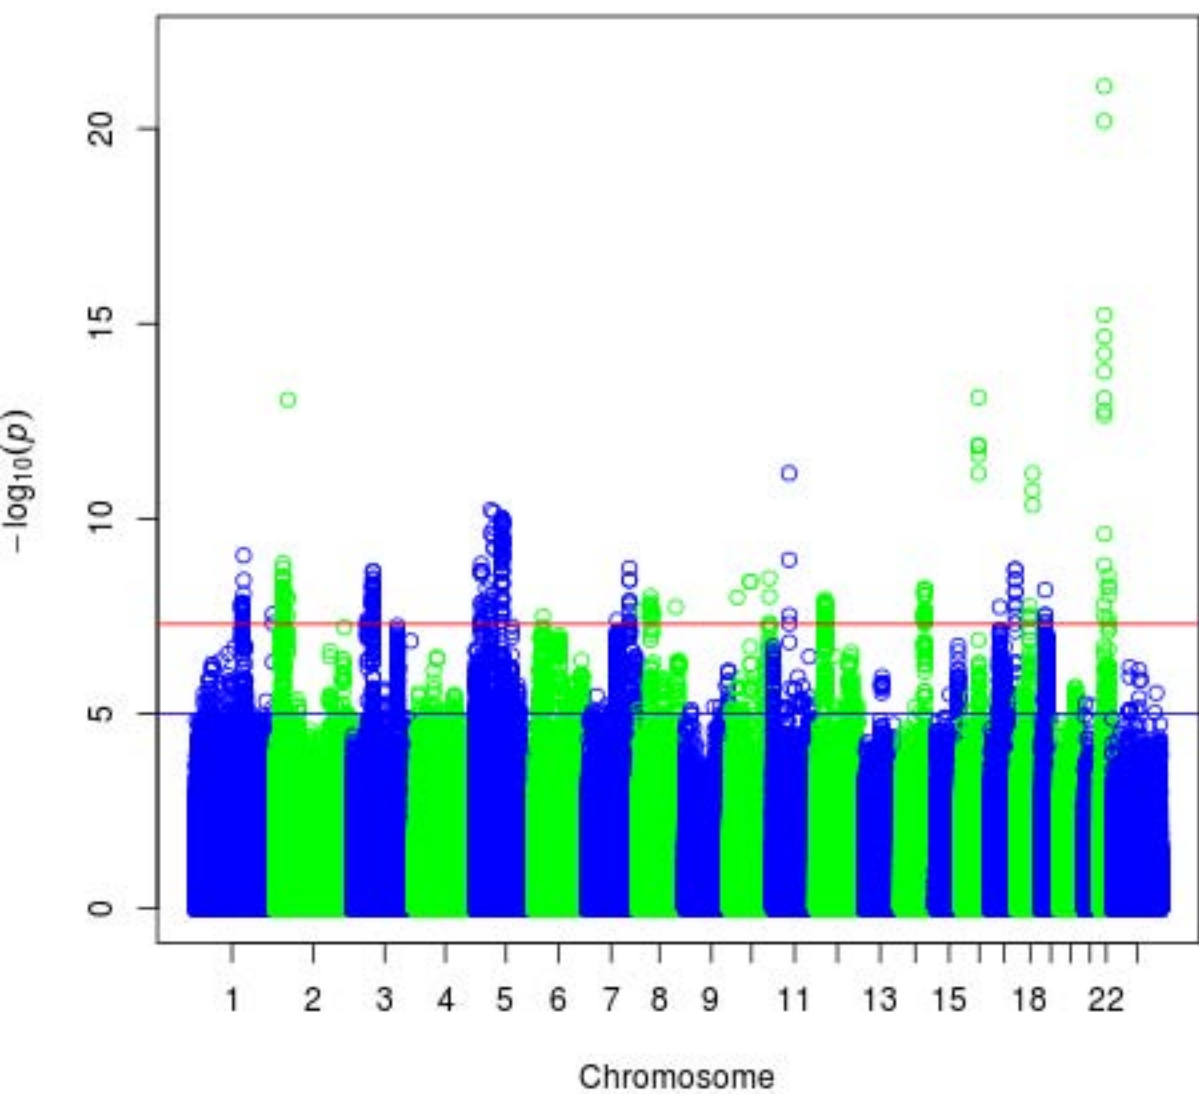



**Supplementary Figure 2:** Quantile-quantile plot of the observed vs. expected chi-squared statistics for the meta-analysis of the combined GWAS and iCOGS results. Variants within 500kb of previously established breast cancer susceptibility loci were removed. Each circle represents the chi-squared statistic for a single variant. The blue diagonal line represents the predicted association statistics under the global null hypothesis of no association.

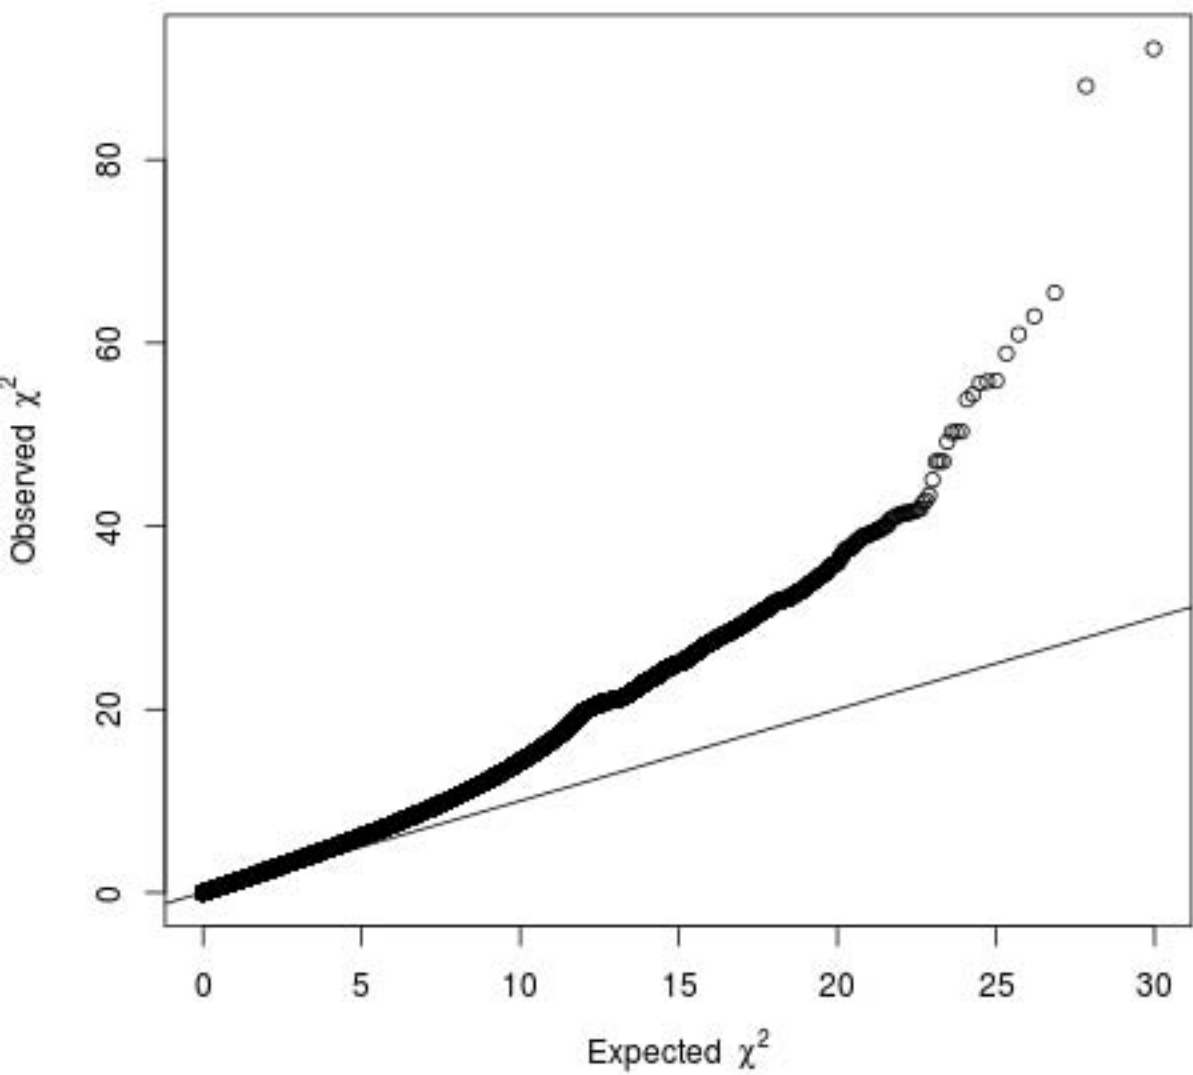

**Supplementary Figure 3: a)** Manhattan Plot of associations for the results in the *CHEK2* region (chromosome 22, b37: 280,000,000-30,121,477), in the subset of individuals that had both iCOGS and the *CHEK2*\*1100delC variant genotyped **b)** Manhattan Plot of associations for the (chromosome 22, b37: 280,000,000-30,121,477) region, after adjusting for *CHEK2*\*1100delC.

a)

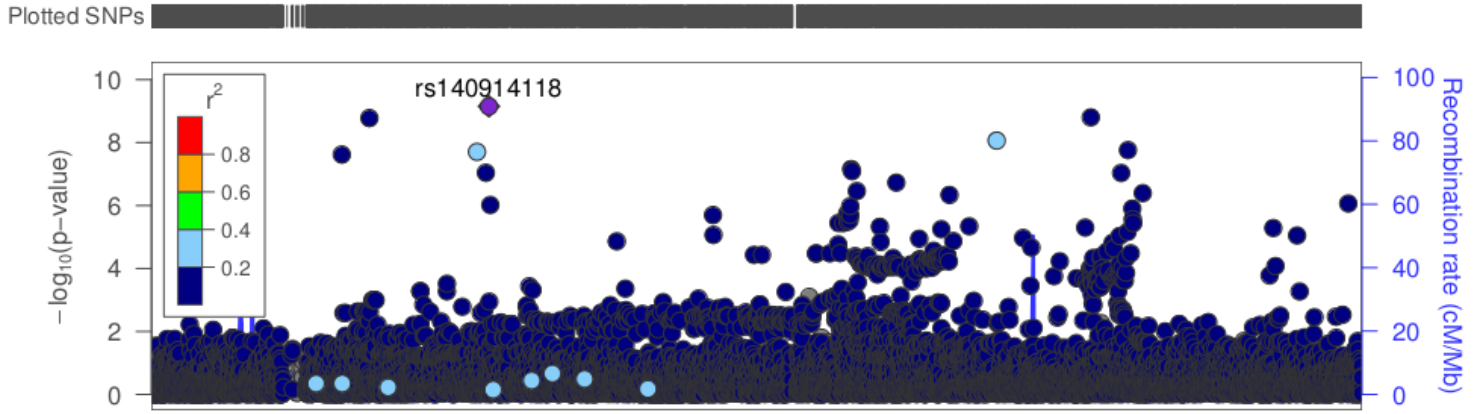

b)

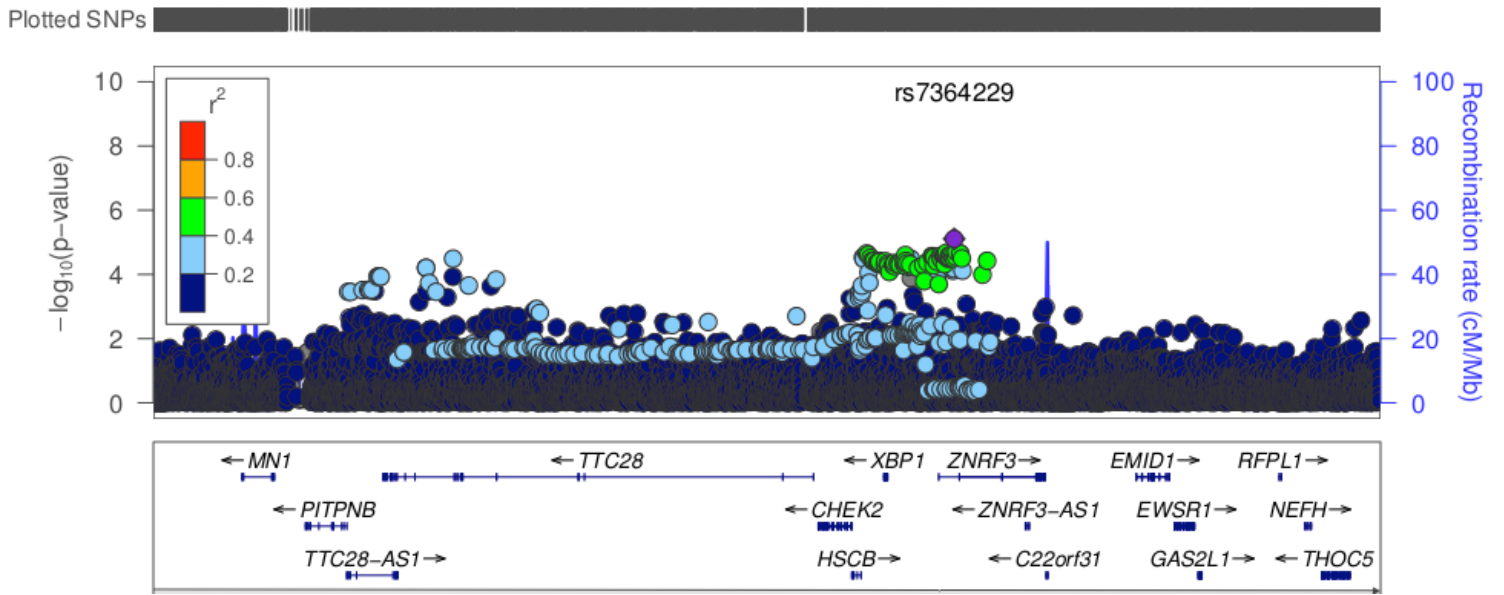

**Supplementary Figure 4:** Forest plots for the 15 loci achieving genome-wide significance. Squares denote the estimated per-allele odds ratio for the minor allele in Europeans. The horizontal lines denote 95% confidence intervals. The area of the square is inversely proportional to the variance of the estimate. The diamond denotes the estimated per-allele OR from the combined analyses.  $I^2$  and heterogeneity  $P$ -values were calculated in the iCOGS studies alone.

rs12405132

**GWAS**

- ABCFS\_GWAS
- BBCS\_GWAS
- DFBBCS\_GWAS
- GCHBOC\_GWAS
- HEBCS\_GWAS
- MARIE\_GWAS
- SASBAC\_GWAS
- UK2\_GWAS
- TNBCC\_GWAS
- BPC3\_GWAS
- BCFR\_GWAS

**Combined\_GWAS**

**iCOGS**

- ABCFS
- ABCS
- BBC
- BBCS
- BIGGS
- BSUCH
- CECILE
- CGPS
- CNIO-BCS
- CTS
- DEMOKRITOS
- ESTHER
- GENICA
- HEBCS
- HMBCS
- KARBAC
- KBCP
- kConFab/AOCS
- LMBC
- MARIE
- MBCSG
- MCBCS
- MCCS
- MEC
- MTLGEBCS
- NBCS
- NBHS\_TN
- OBCS
- OFBCR
- ORIGO
- OSU
- PBCS
- pKARMA
- RBCS
- RPCI
- SASBAC
- SBCS
- SEARCH
- SKK
- SZBCS
- UKBGS
- iCOGS\_all**
- Combined**

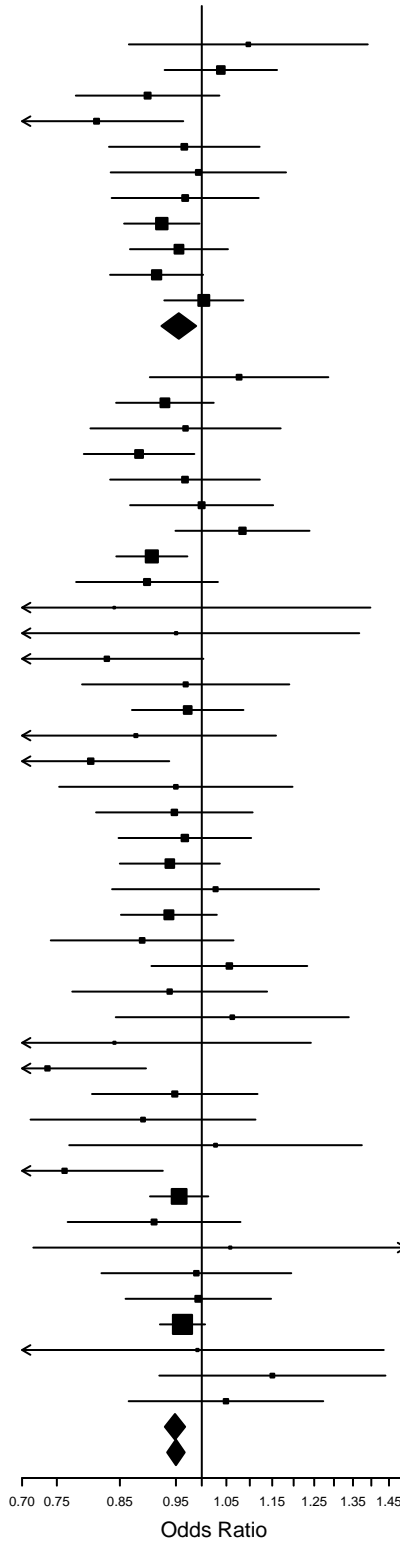



rs12048493

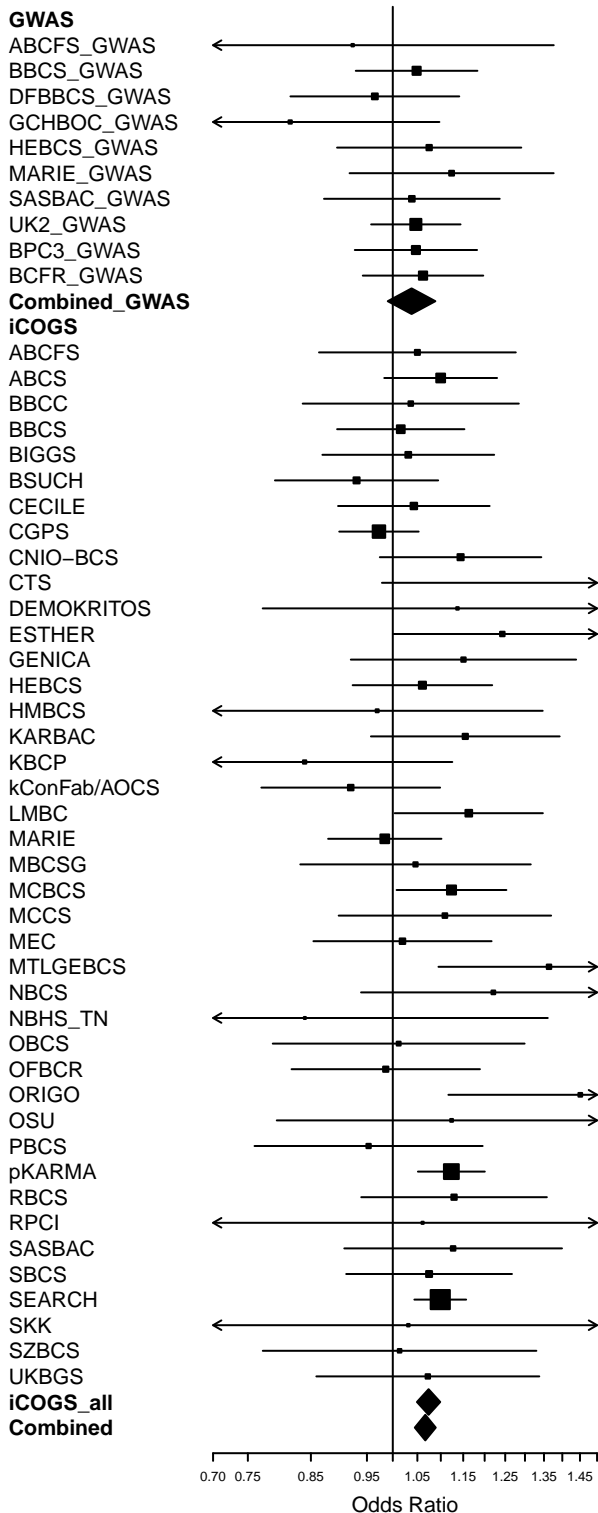

p-het iCOGS=0.15  
I<sup>2</sup> iCOGS=18.87

rs72755295

**GWAS**

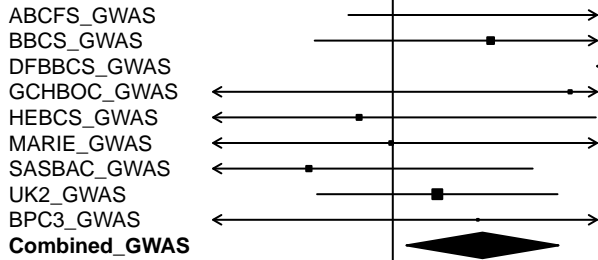

**Combined\_GWAS**

**iCOGS**

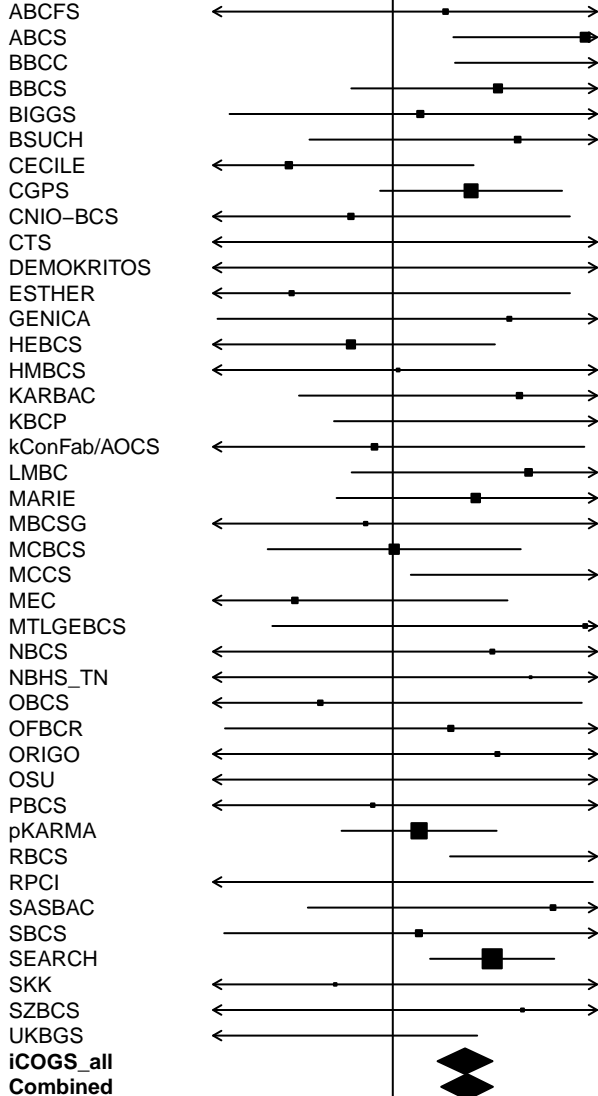

p-het iCOGS=0.38  
 $I^2$  iCOGS=4.91

0.70 0.75 0.85 0.95 1.05 1.15 1.25 1.35 1.45  
Odds Ratio

rs6796502

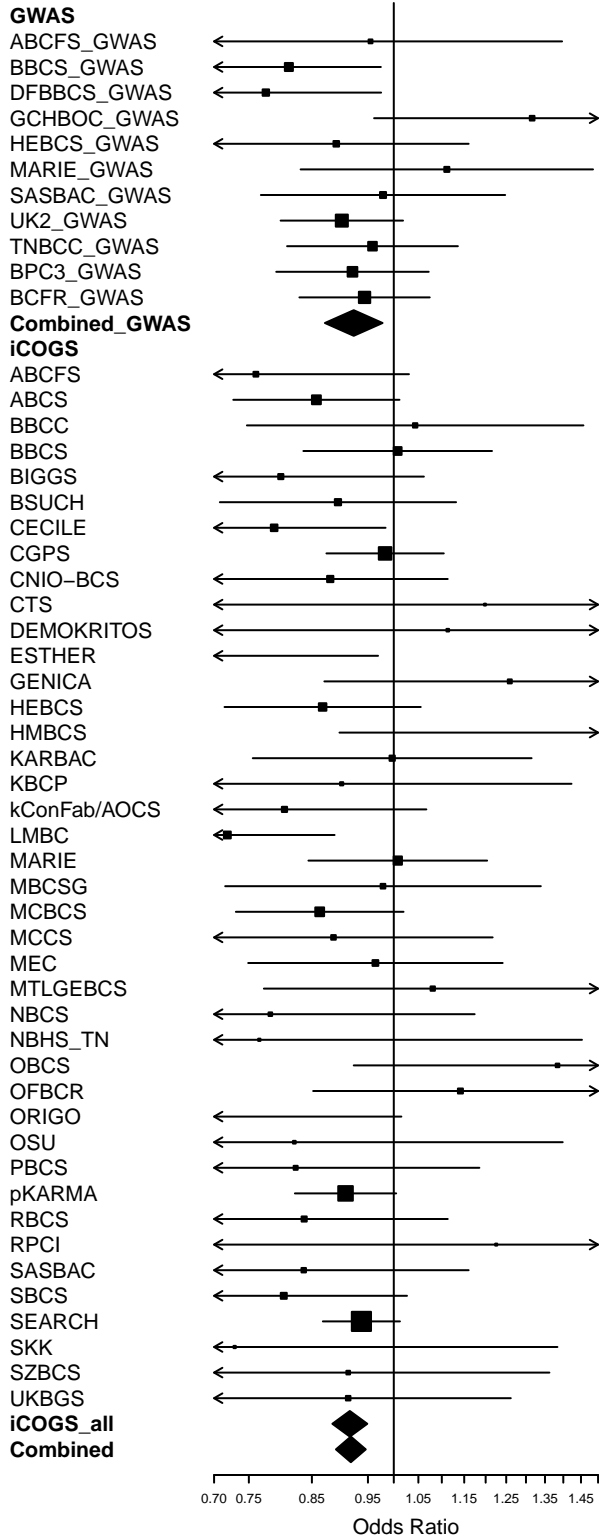

p-het iCOGS=0.46  
I<sup>2</sup> iCOGS=0.38

Odds Ratio

rs13162653

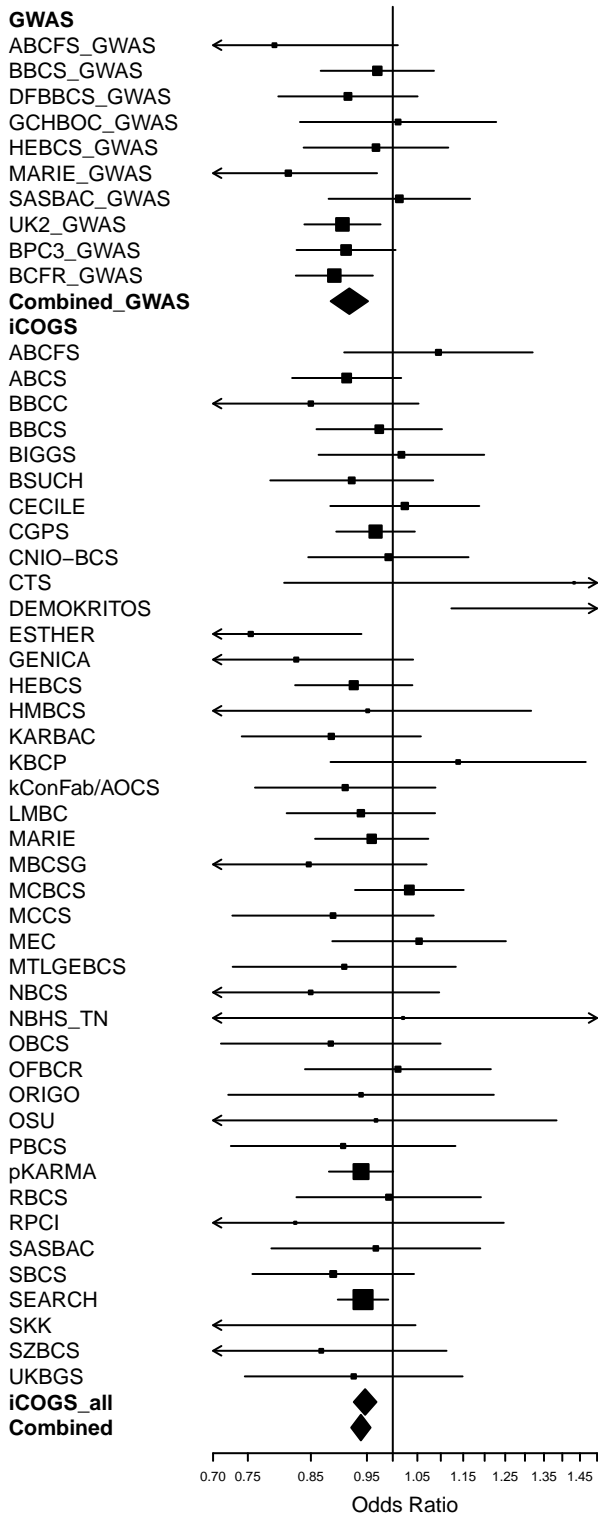

p-het iCOGS=0.64  
I<sup>2</sup> iCOGS=0

rs2012709

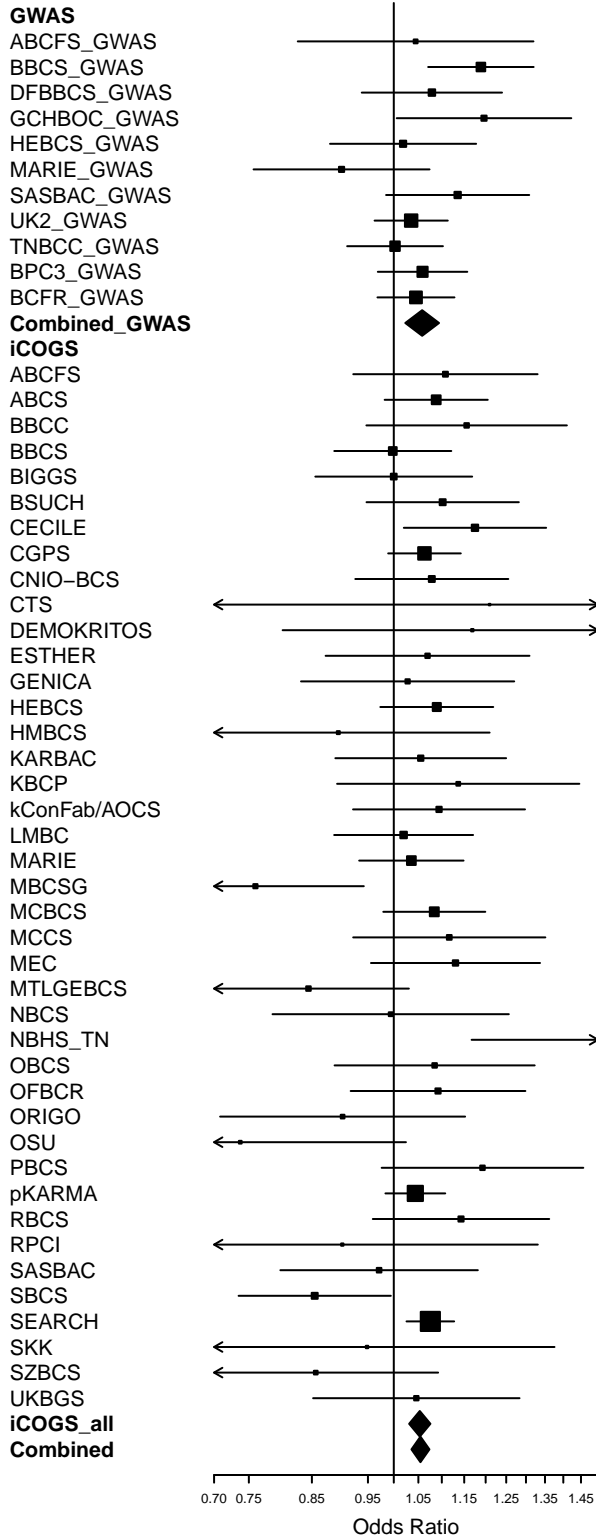

p-het iCOGS=0.12  
I<sup>2</sup> iCOGS=21.03

rs7707921

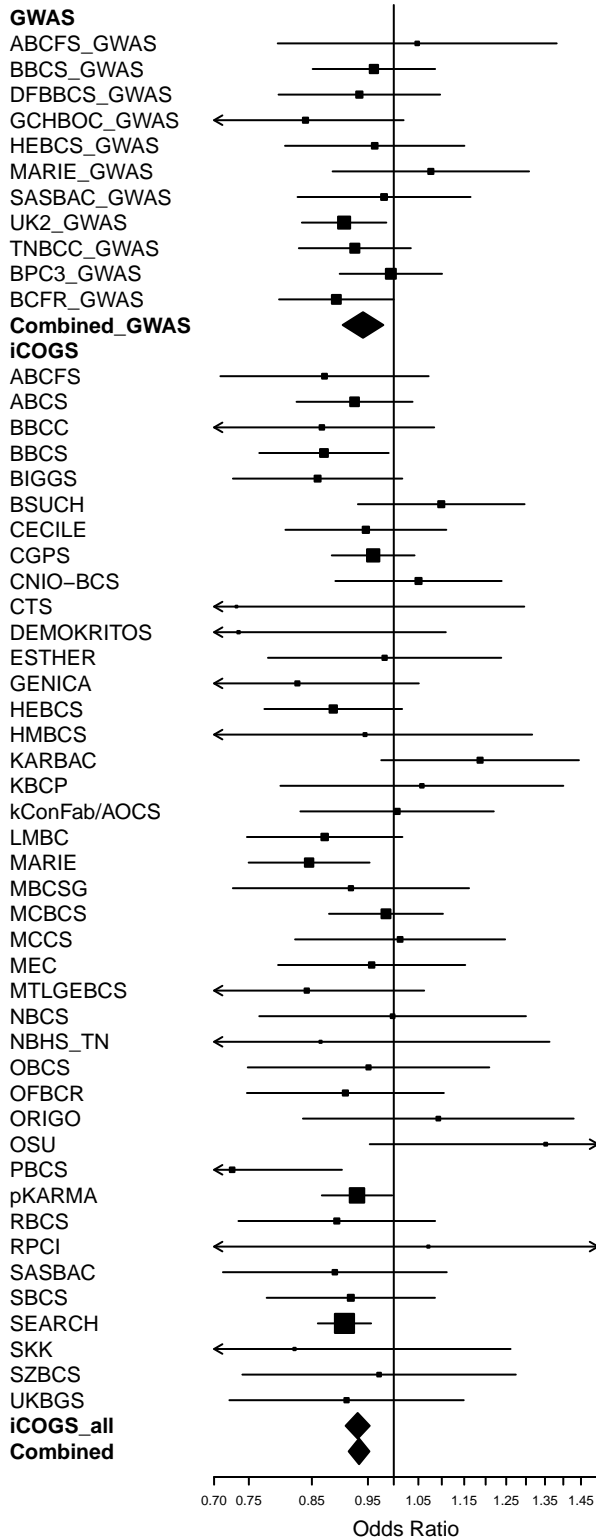

p-het iCOGS=0.52  
I<sup>2</sup> iCOGS=0



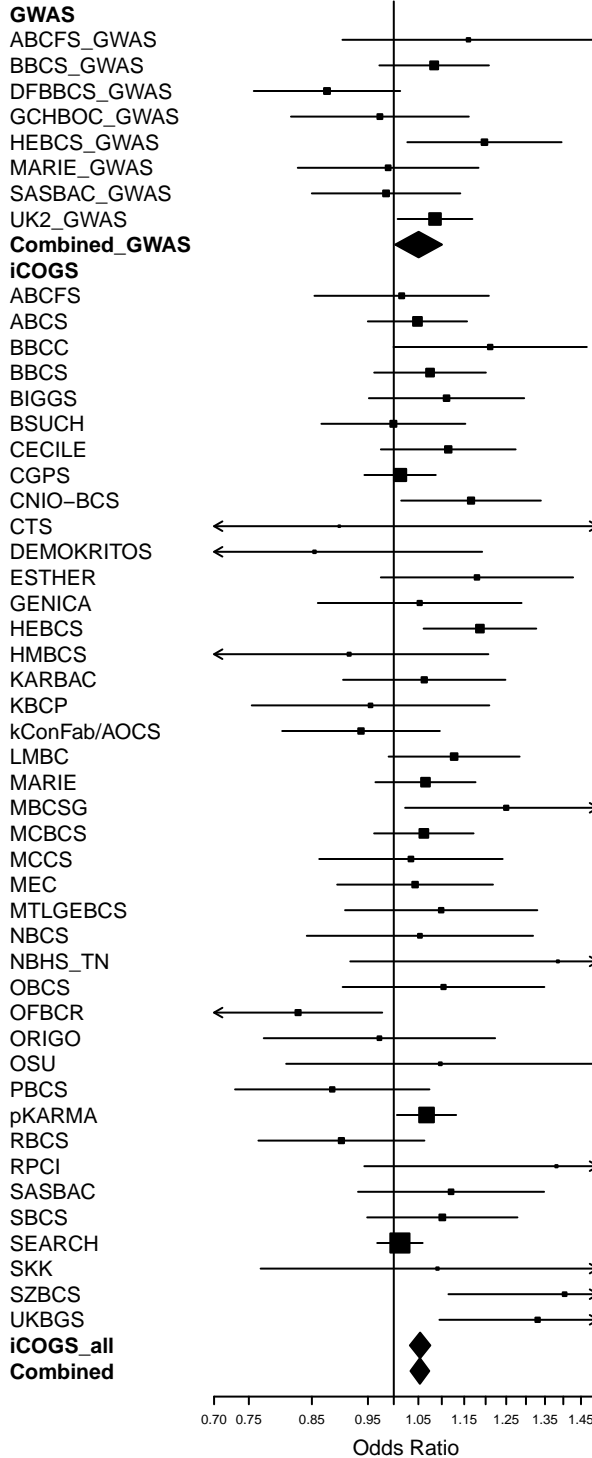

rs4593472

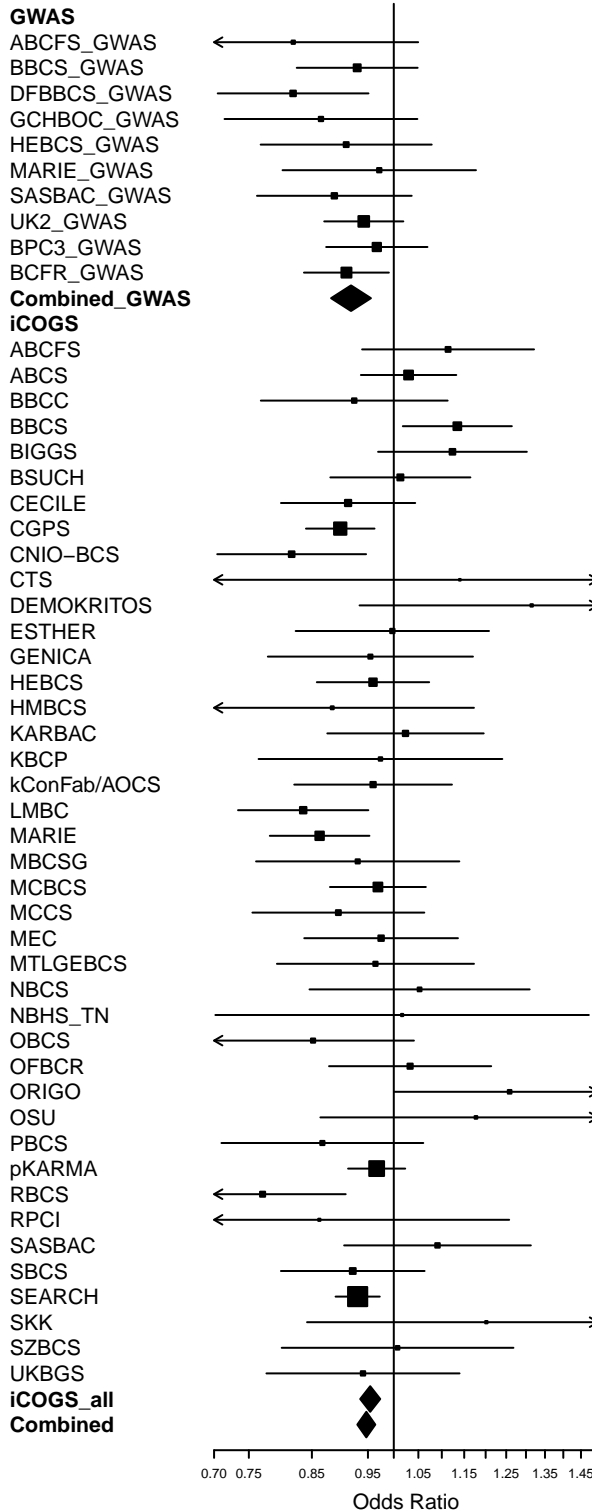

p-het iCOGS=0.01  
I<sup>2</sup> iCOGS=39.47

rs13365225

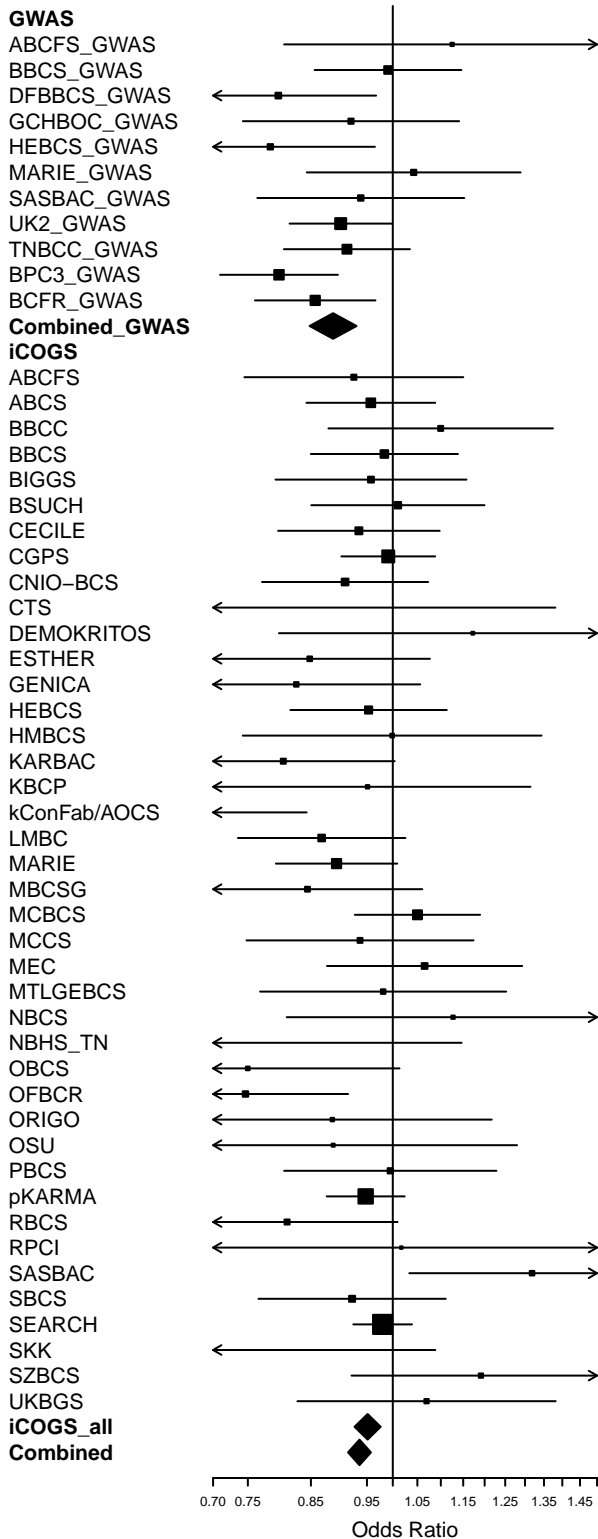

p-het iCOGS=0.08  
I<sup>2</sup> iCOGS=24.85

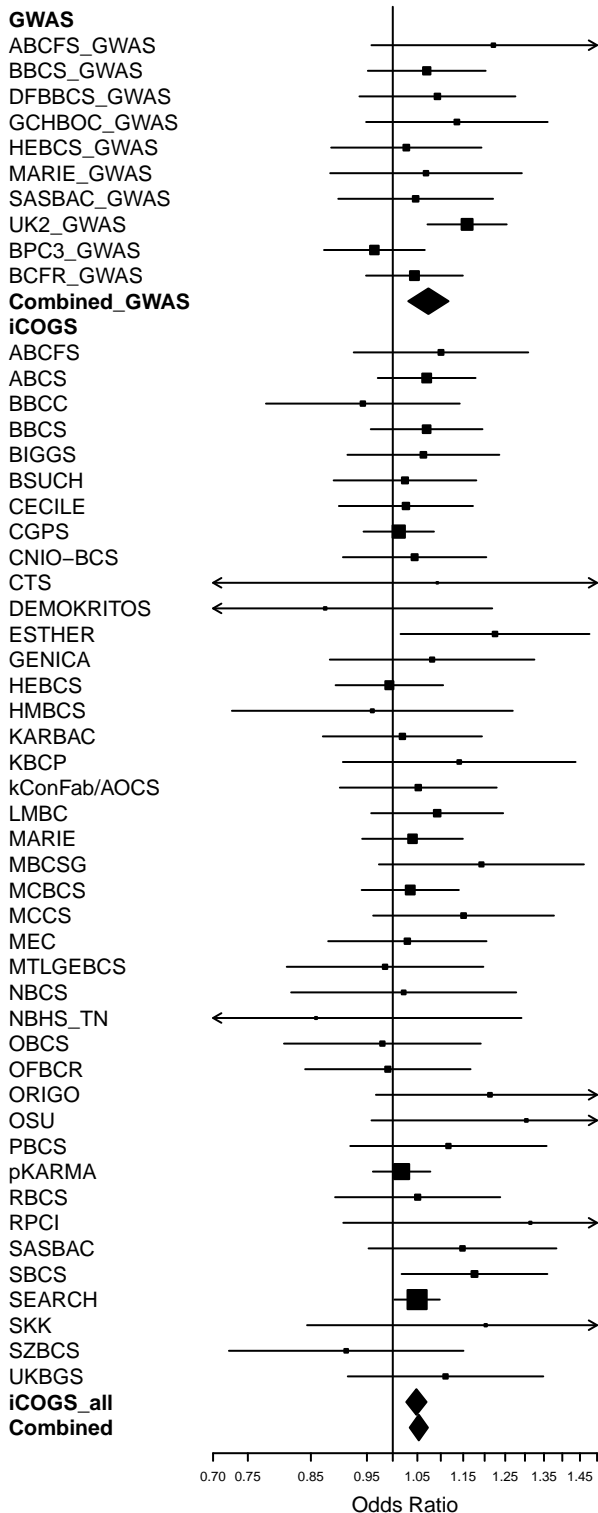

p-het iCOGS=0.95  
I<sup>2</sup> iCOGS=0

rs11627032

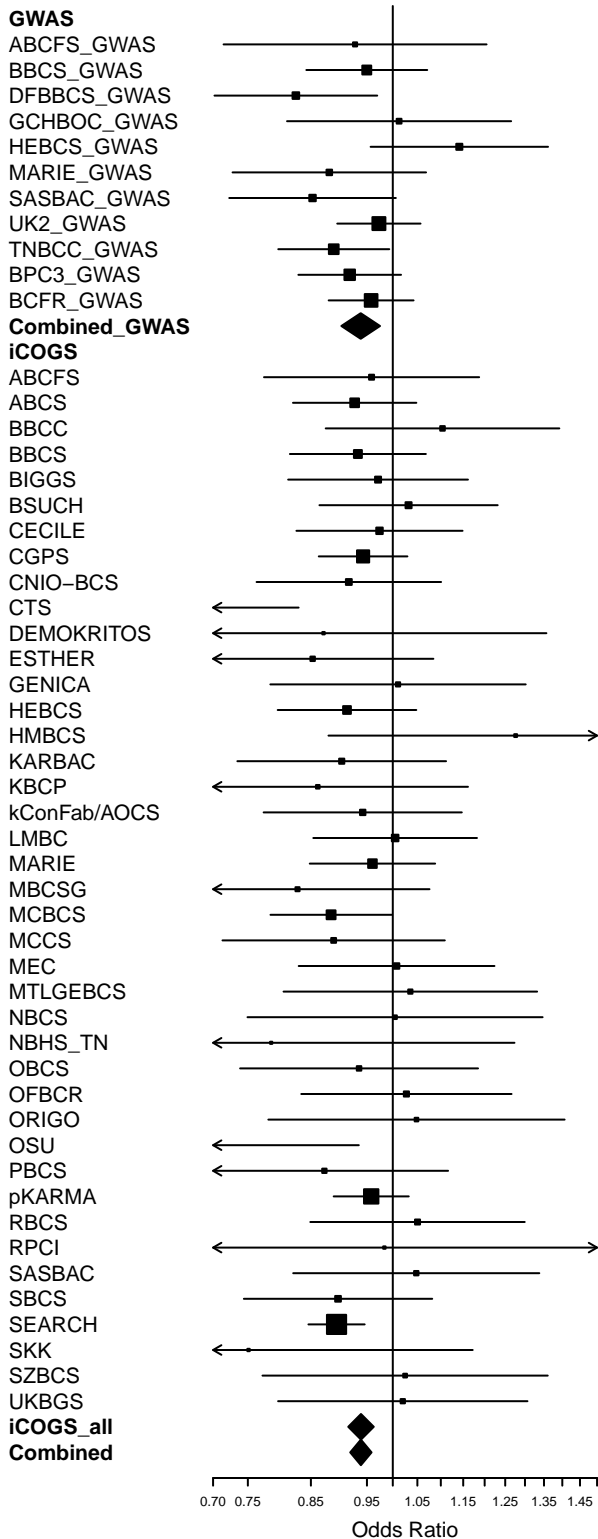

p-het iCOGS=0.87  
I<sup>2</sup> iCOGS=0

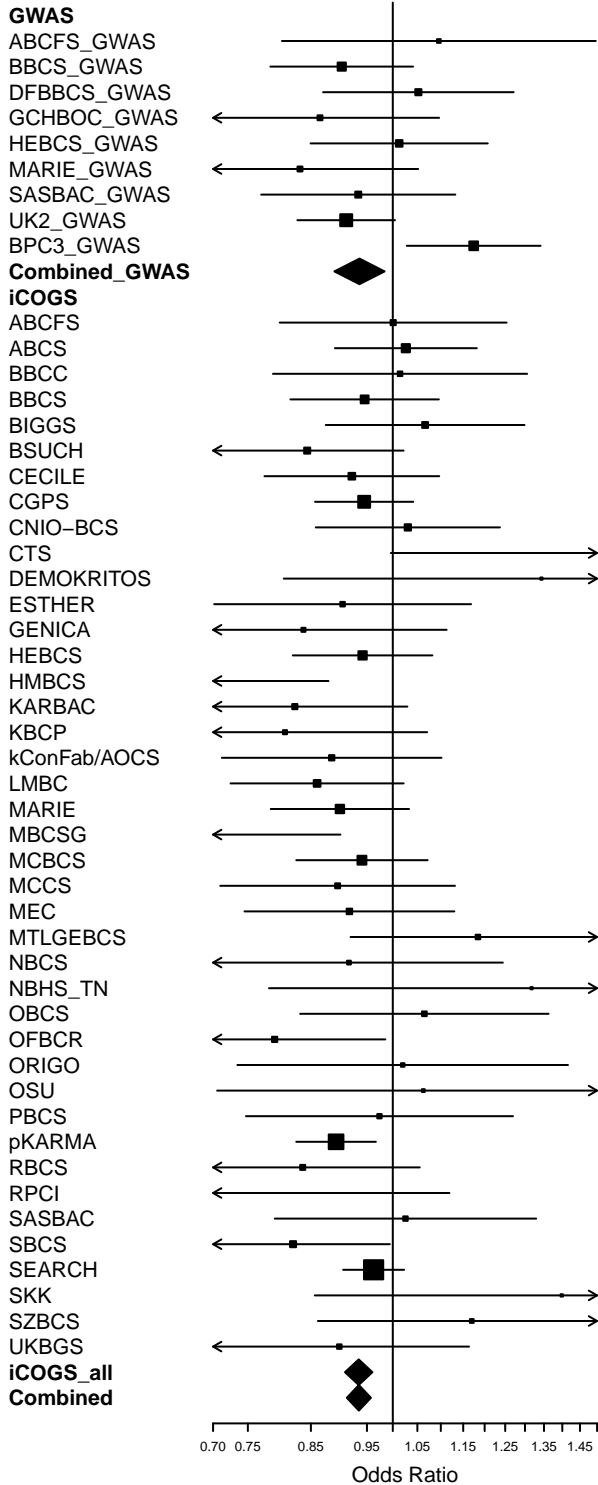

p-het iCOGS=0.13  
I<sup>2</sup> iCOGS=20.26



rs745570

**GWAS**

- ABCFS\_GWAS
- BBCS\_GWAS
- DFBBCS\_GWAS
- GCHBOC\_GWAS
- HEBCS\_GWAS
- MARIE\_GWAS
- SASBAC\_GWAS
- UK2\_GWAS
- TNBCC\_GWAS
- BPC3\_GWAS
- BCFR\_GWAS
- Combined\_GWAS**

**iCOGS**

- ABCFS
- ABCS
- BBCS
- BBCS
- BIGGS
- BSUCH
- CECILE
- CGPS
- CNIO-BCS
- CTS
- DEMOKRITOS
- ESTHER
- GENICA
- HEBCS
- HMBCS
- KARBAC
- KBCP
- kConFab/AOCS
- LMBC
- MARIE
- MBCSG
- MCBCS
- MCCS
- MEC
- MTLGEBCS
- NBCS
- NBHS\_TN
- OBCS
- OFBCR
- ORIGO
- OSU
- PBCS
- pKARMA
- RBCS
- RPCI
- SASBAC
- SBCS
- SEARCH
- SKK
- SZBCS
- UKBGS
- iCOGS\_all**
- Combined**

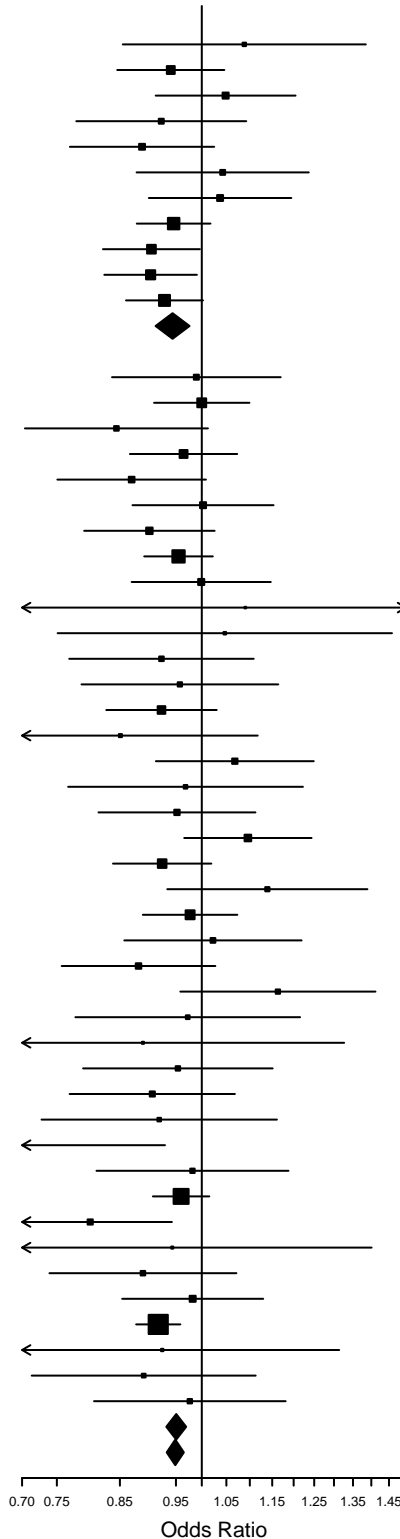

p-het iCOGS=0.59  
I<sup>2</sup> iCOGS=0

rs6507583

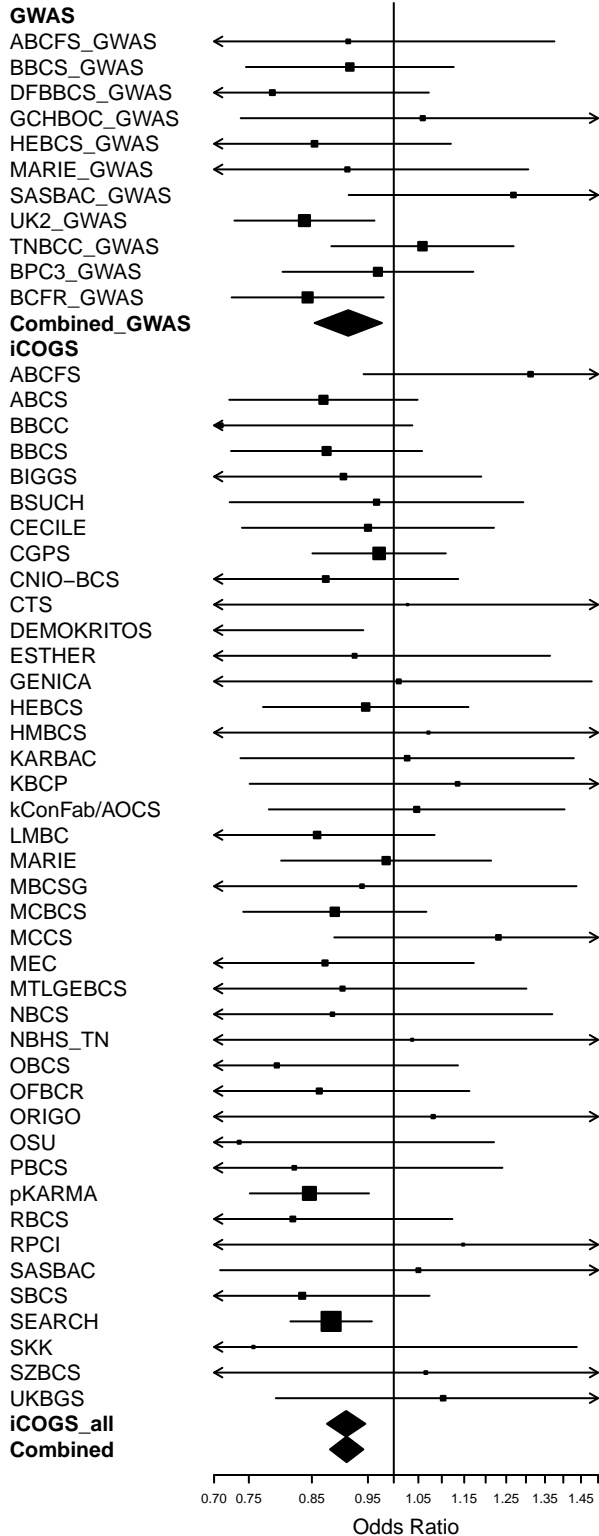

p-het iCOGS=0.94  
I<sup>2</sup> iCOGS=0

Odds Ratio

**Supplementary Figure 5:** The chromosome 18 locus tagged by rs6507583 **a)** The Manhattan Plot displays the strength of genetic association ( $-\log_{10} P$ ) versus chromosomal position (Mb), where each dot presents a genotyped (solid black dot) or imputed (red circle) SNP (in the iCOGS stage). The purple horizontal line represents the threshold for genome-wide significance ( $P=5 \times 10^{-8}$ ). Gene structures are depicted as well as the location of SNPs with  $MAF > 0.01$  which were neither imputed reliably nor genotyped. **b)** Mammary cell enhancer locations as defined in Corradin et al.<sup>33</sup>, and Hnisz et al.<sup>34</sup>, are shown where elements overlapping the best associated SNPs are labelled with their predicted target genes. A subset of ChiA-PET interactions in MCF7 cells (mediated by either RNApolIII or ERa) between enhancers and their target gene promoters are also shown.

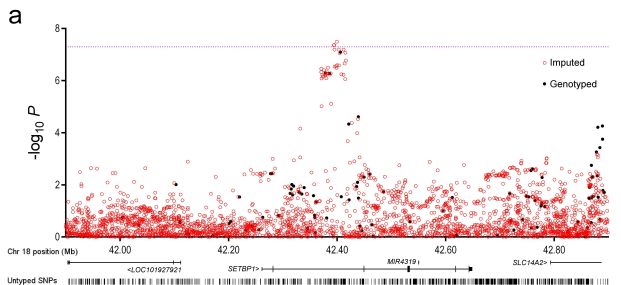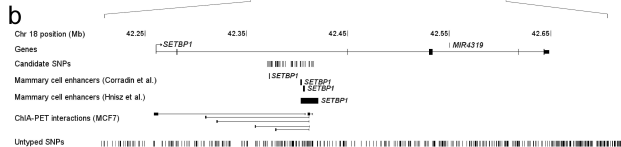

**Supplementary Figure 6:** Manhattan plots of association for the eQTL results (chromosome 5, b37: 80,928,261-81,928,2611) in all breast cancer tumours, ER+, ER- tumours and normal from the TCGA data. The bottom plot represents the breast cancer meta-analysis risk results.



## RPS23

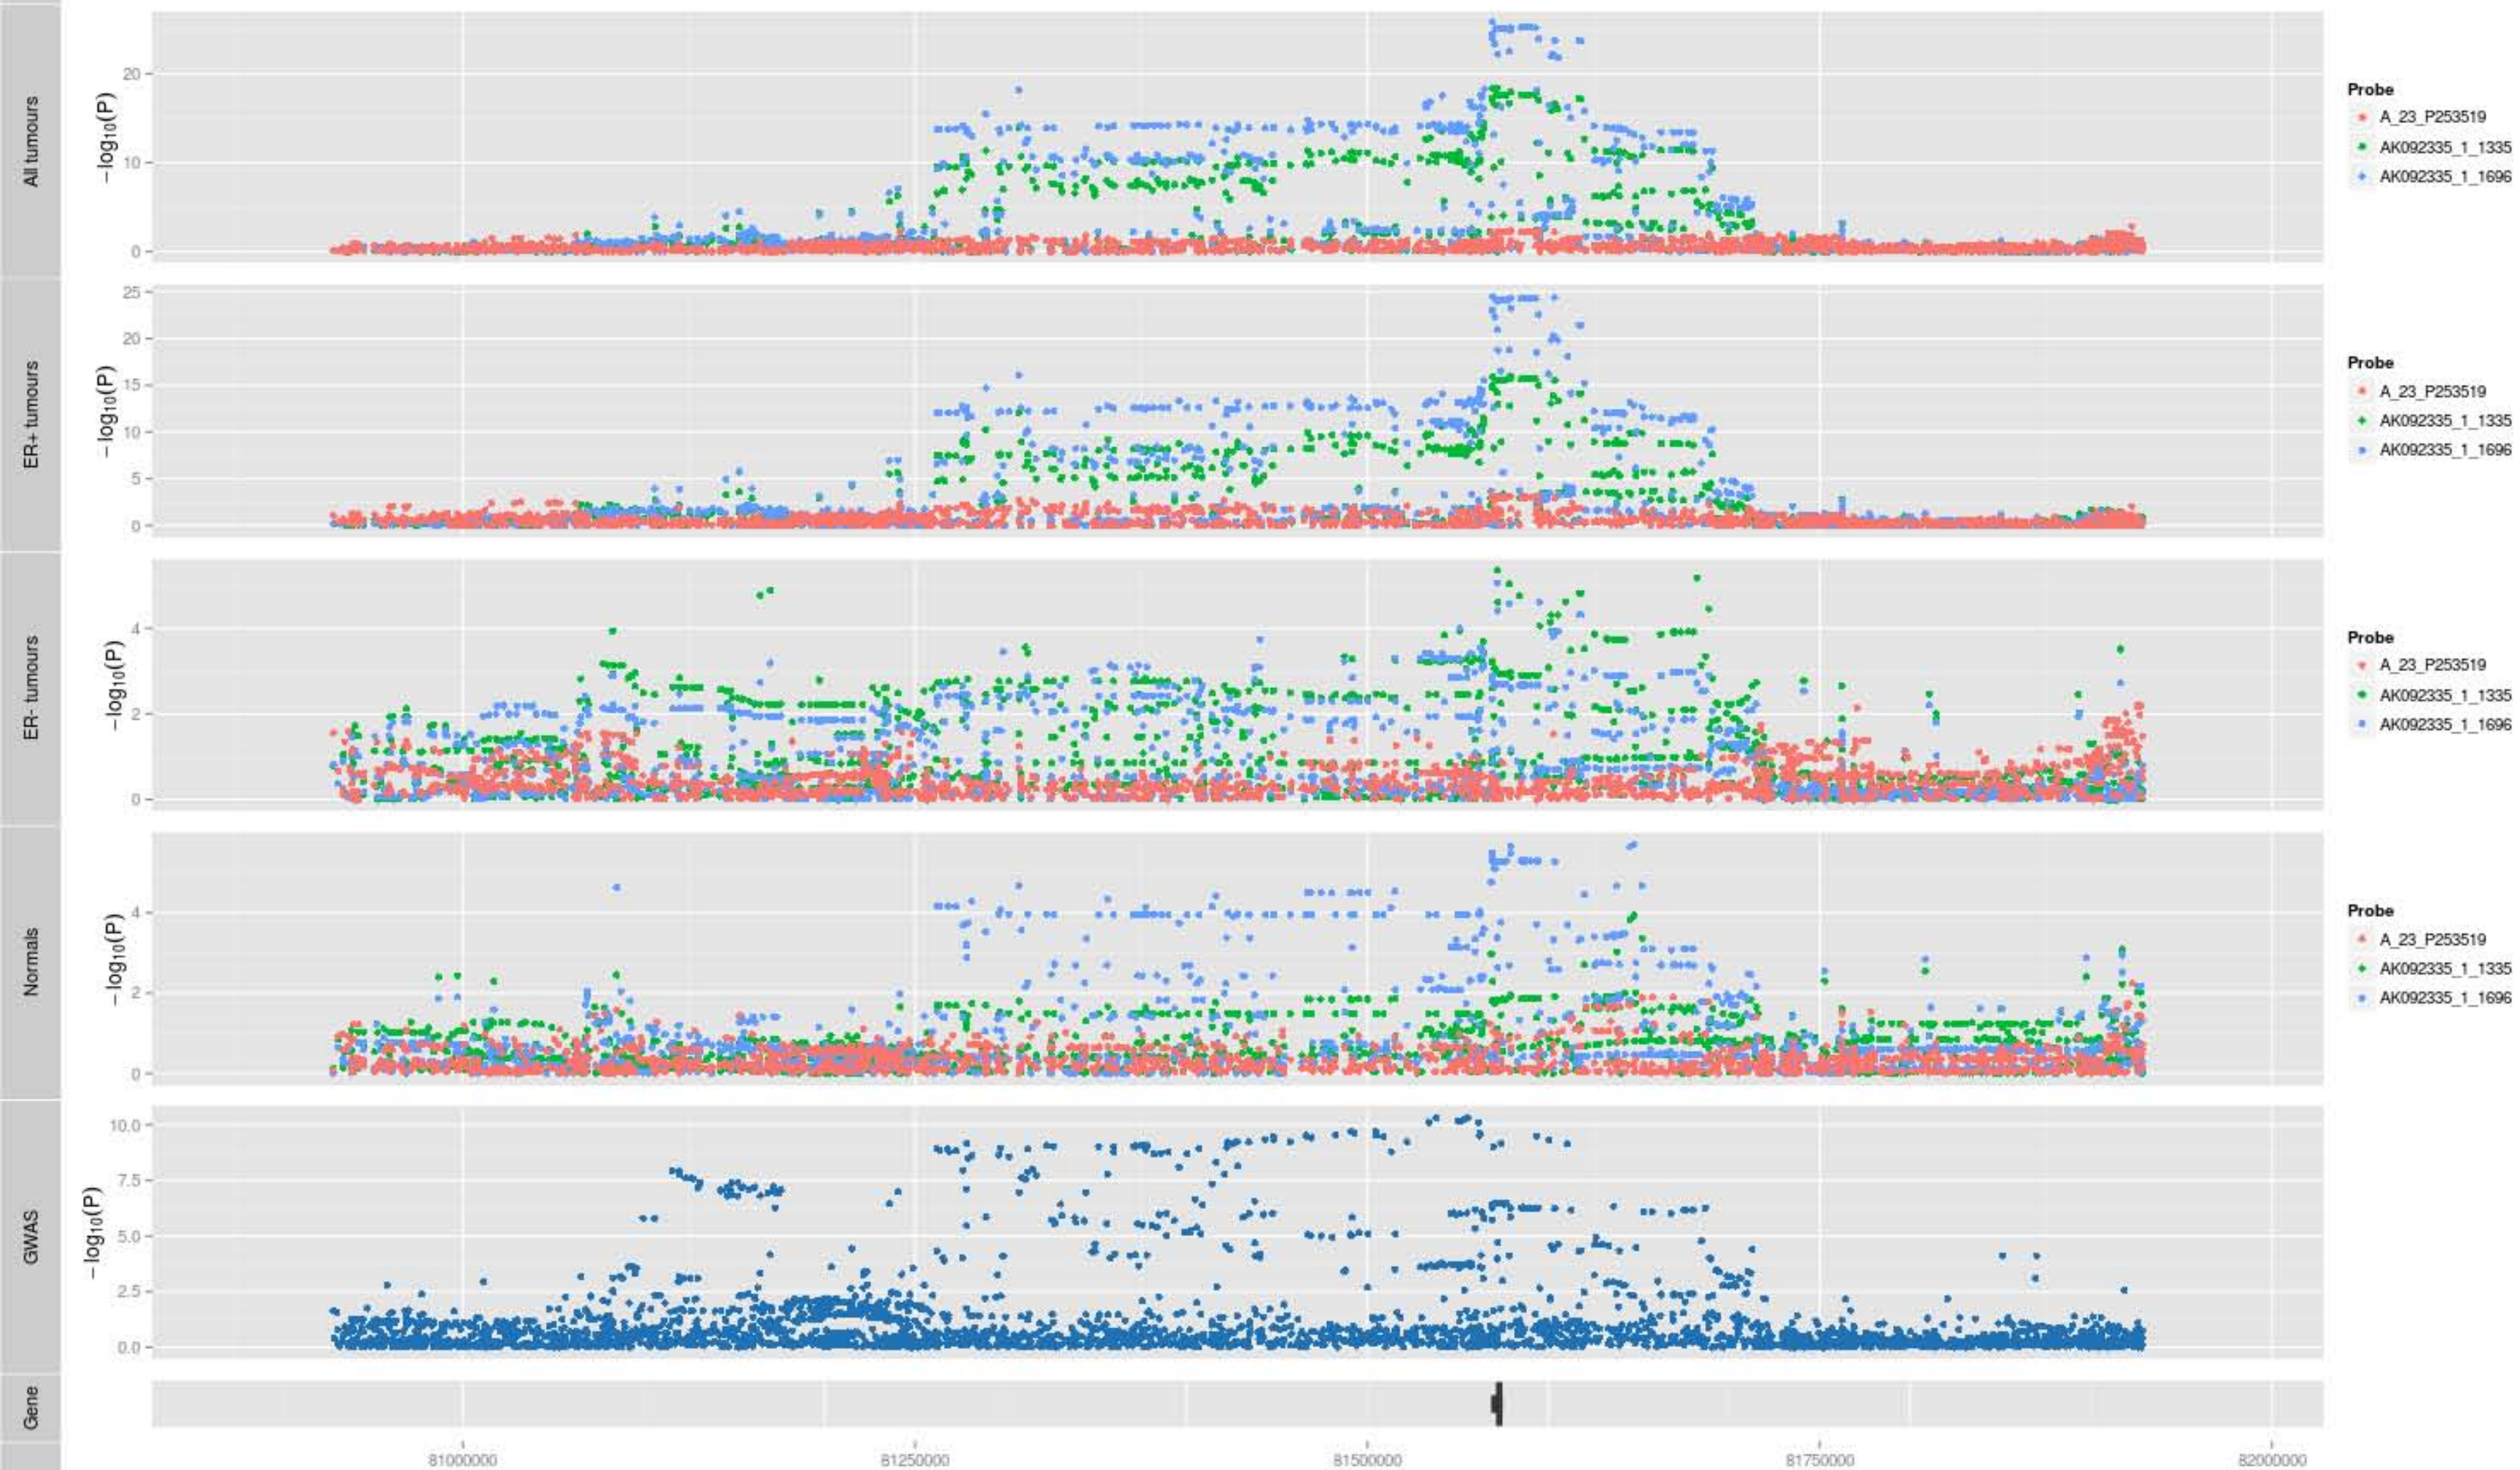



**Supplementary Table 1.** Studies contributing to the analysis.

**Supplementary Table 1a.** BCAC Genome-Wide Association Studies.

| <b>Study<sup>1</sup></b> | <b>Country</b> | <b>Cases<sup>1,2</sup></b> | <b>Controls<sup>1,2</sup></b> | <b>ER+/ER- cases<sup>1,2</sup></b> | <b>Genotyping Platform</b>                                  |
|--------------------------|----------------|----------------------------|-------------------------------|------------------------------------|-------------------------------------------------------------|
| ABCFS/kConFab            | Australia      | 282                        | 285                           | 88/72 (72)                         | Illumina 610k                                               |
| BBCS <sup>4</sup>        | U.K.           | 1609                       | 1224                          | -                                  | Illumina 370k (cases)/<br>Illumina 1.2M (controls)          |
| DFBBCS <sup>5</sup>      | Netherlands    | 464                        | 3255                          | -                                  | Illumina 610k (cases)<br>/Illumina 550k (controls)          |
| GC-HBOC <sup>6</sup>     | Germany        | 634                        | 477                           | -                                  | Affymetrix 5.0k(cases)<br>/Affymetrix 6.0k<br>(controls)    |
| GWAS_UK2 <sup>4</sup>    | U.K.           | 3628                       | 2663                          | 361/160 (160)                      | Illumina 670k<br>(cases)/Illumina 1.2M<br>(controls)        |
| HEBCS <sup>7</sup>       | Finland        | 726                        | 1012                          | 522/229 (145)                      | Illumina 550k+ 610k<br>(cases)/ Illumina 370k<br>(controls) |
| MARIE <sup>6</sup>       | Germany        | 652                        | 470                           | 567/132 (76)                       | Illumina 370k (cases)<br>/Illumina 550k (controls)          |
| SASBAC                   | Sweden         | 790                        | 756                           | 481/109 (109)                      | Illumina 317k+240k<br>(cases) /Illumina 550k<br>(controls)  |

<sup>1</sup>For further details see <sup>3</sup>.

<sup>2</sup> Sample numbers after quality control exclusions.

<sup>3</sup>Numbers in brackets are numbers of ER-cases after elimination of duplicates with TNBCC.

<sup>4</sup> Controls from Welcome Trust Case-Control Consortium.

<sup>5</sup> Controls from Rotterdam Study.

<sup>6</sup> Controls from KORA.

<sup>7</sup> Controls from NordicDB.

**Supplementary Table 1b** Studies contributing to the BPC3 GWAS

| <b>Study<sup>1</sup></b> | <b>Country</b> | <b>Cases</b> | <b>Controls</b> | <b>ER+/ER- cases<sup>2</sup></b> |
|--------------------------|----------------|--------------|-----------------|----------------------------------|
| CPS-II                   | USA            | 293          | 295             | 0/293                            |
| EPIC                     | Europe         | 511          | 500             | 0/511                            |
| MEC                      | USA            | 86           | 101             | 0/86                             |
| NHS2                     | USA            | 76           | 374             | 0/76                             |
| PBCS                     | Poland         | 543          | 511             | 0/543                            |
| PLCO                     | USA            | 255          | 340             | 0/255                            |
| NHS                      | USA            | 234          | 184             | 0/234                            |

<sup>1</sup> For further details see <sup>4,5</sup>.

<sup>2</sup> Cases selected to be ER-negative

**Supplementary table 1c:** Studies contributing to the Early-onset Breast Cancer GWAS (EBCG).

| <b>Site<sup>1</sup></b> | <b>Country</b> | <b>Cases</b> | <b>Controls</b> | <b>ER+/ER- cases</b> |
|-------------------------|----------------|--------------|-----------------|----------------------|
| BCFR (AUS)              | Australia      | 593          | 250             | 368/176              |
| BCFR (NCA)              | USA            | 204          | 156             | 130/48               |
| BCFR (Ontario)          | Canada         | 668          | 395             | 404/185              |
| GESBC                   | Germany        | 553          | 1,071           | 288/179              |
| LI                      | US             | 225          | 275             | 112/53               |
| Seattle                 | US             | 297          | 328             | 219/72               |
| USC                     | US             | 983          | -               | 662/198              |
| CCFR                    | US             | -            | 227             | -                    |

<sup>1</sup> For further details see <sup>6</sup>.

**Supplementary Table 1d: Studies contributing to the TNBCC GWAS**

| <b>Study<sup>1</sup></b> | <b>Country</b> | <b>Cases</b> | <b>Controls<sup>2</sup></b> | <b>ER+/ER- cases<sup>3</sup></b> |
|--------------------------|----------------|--------------|-----------------------------|----------------------------------|
| ABCTB                    | Australia      | 144          | 0                           | 0/144                            |
| MCCS                     | Australia      | 39           | 0                           | 0/39                             |
| QIMR                     | Australia      | 0            | 650                         | -                                |
| BBCC                     | Germany        | 218          | 0                           | 0/218                            |
| GENICA                   | Germany        | 59           | 0                           | 0/59                             |
| MARIE                    | Germany        | 198          | 0                           | 0/198                            |
| KORA                     | Germany        | 0            | 215                         | -                                |
| DFCI                     | USA            | 246          | 0                           | 0/246                            |
| FCCC                     | USA            | 120          | 0                           | 0/120                            |
| MCBCS                    | USA            | 147          | 0                           | 0/147                            |
| CGEMS                    | USA            | 0            | 947                         | -                                |
| POSH                     | UK             | 266          | 0                           | 0/266                            |
| SBCS                     | UK             | 42           | 0                           | 0/42                             |
| WTCCC                    | UK             | 0            | 1368                        | -                                |

<sup>1</sup> For further details see <sup>4,7,8</sup>.

<sup>2</sup> TNBCC used external controls, drawn from population-based studies from the same countries as the cases.

<sup>3</sup> Cases were selected to be ER-negative, PR-negative and HER2-negative.

**Supplementary Table 1e:** Studies contributing to the iCOGS analysis.

| <b>Study<sup>1</sup></b> | <b>Country</b> | <b>Cases</b> | <b>Controls</b> | <b>ER+/ER- Cases</b> |
|--------------------------|----------------|--------------|-----------------|----------------------|
| ABCFS                    | Australia      | 643          | 551             | 383/204              |
| ABCS                     | Netherlands    | 2029         | 1815            | 768/282              |
| BBC                      | Germany        | 548          | 458             | 460/67               |
| BBCS                     | U.K.           | 1507         | 1397            | 493/108              |
| BIGGS                    | Ireland        | 836          | 719             | 495/154              |
| BSUCH                    | Germany        | 848          | 954             | 548/157              |
| CECILE                   | France         | 1019         | 999             | 797/144              |
| CGPS                     | Denmark        | 2948         | 4534            | 1919/357             |
| CNIO-BCS                 | Spain          | 902          | 876             | 242/88               |
| CTS                      | U.S.A.         | 68           | 71              | 0/68                 |
| DEMOKRITOS               | Greece         | 413          | 95              | 0/413                |
| ESTHER                   | Germany        | 478          | 502             | 304/98               |
| GENICA                   | Germany        | 449          | 427             | 327/104              |
| HEBCS                    | Finland        | 1658         | 1233            | 1292/235             |
| HMBCS                    | Belarus        | 690          | 130             | 37/8                 |
| KARBAC                   | Sweden         | 722          | 662             | 338/63               |
| KBCP                     | Finland        | 441          | 250             | 300/97               |
| kConFab/AOCS             | Australia      | 575          | 897             | 152/55               |
| LMBC                     | Belgium        | 2671         | 1388            | 2071/378             |
| MARIE                    | Germany        | 1743         | 1788            | 1328/346             |
| MBCSG                    | Italy          | 488          | 400             | 149/42               |
| MCBCS                    | U.S.A.         | 1836         | 1931            | 1486/269             |
| MCCS                     | Australia      | 604          | 511             | 351/110              |
| MEC                      | U.S.A.         | 731          | 741             | 415/87               |
| MTLGBCS                  | Canada         | 489          | 436             | 421/64               |
| NBCS                     | Norway         | 908          | 217             | 620/201              |
| NBHS_TN                  | U.S.A.         | 125          | 118             | 0/125                |
| OBCS                     | Finland        | 505          | 414             | 405/100              |
| OFBCR                    | Canada         | 1175         | 511             | 629/269              |
| ORIGO                    | Netherlands    | 354          | 327             | 208/70               |
| OSU                      | U.S.A.         | 207          | 203             | 0/207                |
| PBCS                     | Poland         | 519          | 424             | 519/0                |
| pKARMA                   | Sweden         | 5429         | 5568            | 3670/701             |
| RBCS                     | Netherlands    | 599          | 699             | 323/124              |
| RPCI                     | U.S.A          | 136          | 126             | 0/136                |
| SASBAC                   | Sweden         | 397          | 661             | 198/43               |
| SBCS                     | U.K.           | 832          | 848             | 376/98               |
| SEARCH                   | U.K.           | 9293         | 8068            | 5146/1173            |
| SKK                      | Germany        | 135          | 168             | 0/135                |
| SZBCS                    | Poland         | 365          | 315             | 165/60               |
| UKBGS                    | U.K.           | 470          | 470             | 95/22                |

<sup>1</sup> For further details see <sup>3</sup>.

**Supplementary Table 2:** Number (proportion) of variants reaching imputation  $r^2$  (calculated by the info score IMPUTE2) in iCOGS and UK2 GWAS.

| Study        | #samples | MAF         | #variants<br>(proportion) | $r^2 > 0.3$       | $r^2 > 0.5$       | $r^2 > 0.8$      | $r^2 > 0.9$      |
|--------------|----------|-------------|---------------------------|-------------------|-------------------|------------------|------------------|
| <b>iCOGS</b> | 91,197   | All         | 17,434,450 (1.00)         | 15,703,697 (0.90) | 10,325,641 (0.59) | 4,784,120 (0.27) | 3,145,739 (0.18) |
|              |          | $\geq 0.05$ | 6,761,363 (1.00)          | 6,693,225 (0.99)  | 5,950,307 (0.88)  | 3,614,230 (0.53) | 2,527,392 (0.37) |
|              |          | $< 0.05$    | 10,673,087 (1.00)         | 9,010,472 (0.84)  | 4,375,334 (0.41)  | 1,169,890 (0.11) | 618,347 (0.06)   |
| <b>UK2</b>   | 7,209    | All         | 17,434,450 (1.00)         | 15,645,874 (0.90) | 13,246,754 (0.76) | 9,205,844 (0.53) | 7,739,369 (0.45) |
|              |          | $\geq 0.05$ | 6,761,363 (1.00)          | 6,745,439 (0.998) | 6,673,659 (0.987) | 6,197,337 (0.92) | 5,741,475 (0.85) |
|              |          | $< 0.05$    | 10,673,087 (1.00)         | 8,900,435 (0.85)  | 6,573,095 (0.62)  | 3,008,507 (0.28) | 1,997,894 (0.19) |

**Supplementary Table 3.** Association results for 79 breast cancer susceptibility loci previously reported in studies of women of European ancestry.

**Supplementary table 3a.** Association results for overall breast cancer.

| SNP <sup>1</sup>  | Chr <sup>2</sup> | Position <sup>3</sup> | Alleles <sup>4</sup> | MAF <sup>5</sup><br>GWAS | GWAS OR<br>(95%CI) <sup>6</sup> | GWAS P <sup>7</sup>    | MAF <sup>5</sup><br>iCOGS | r <sup>2</sup><br>iCOGS <sup>8</sup> | iCOGS OR<br>(95%CI) <sup>6</sup> | iCOGS P <sup>7</sup>         | Combined P <sup>9</sup>      |
|-------------------|------------------|-----------------------|----------------------|--------------------------|---------------------------------|------------------------|---------------------------|--------------------------------------|----------------------------------|------------------------------|------------------------------|
| rs616488          | 1                | 10566215              | A/G                  | 0.34                     | 0.94(0.91-0.98)                 | 0.00113                | 0.33                      | 1                                    | 0.94(0.92-0.96)                  | 8.75x10 <sup>-09</sup>       | 3.82x10 <sup>-11</sup>       |
| rs11552449        | 1                | 114448389             | C/T                  | 0.17                     | 1.08(1.03-1.13)                 | 0.00115                | 0.16                      | 1                                    | 1.07(1.04-1.09)                  | 5.98x10 <sup>-07</sup>       | 2.75x10 <sup>-09</sup>       |
| rs11249433        | 1                | 121280613             | A/G                  | 0.42                     | 1.11(1.07-1.16)                 | 6.71x10 <sup>-09</sup> | 0.4                       | 1                                    | 1.09(1.07-1.12)                  | 4.43x10 <sup>-20</sup>       | 2.66x10 <sup>-27</sup>       |
| rs6678914         | 1                | 202187176             | G/A                  | 0.42                     | 0.94(0.91-0.98)                 | 0.000942               | 0.41                      | 1                                    | 1.00(0.98-1.02)                  | 0.712                        | 0.050                        |
| rs4245739         | 1                | 204518842             | A/C                  | 0.27                     | 1.03(0.99-1.07)                 | 0.193                  | 0.26                      | 1                                    | 1.03(1.01-1.05)                  | 0.00503                      | 0.00206                      |
| rs12710696        | 2                | 19320803              | C/T                  | 0.36                     | 1.07(1.04-1.11)                 | 4.57x10 <sup>-05</sup> | 0.36                      | 1                                    | 1.04(1.02-1.06)                  | 0.000481                     | 4.36x10 <sup>-07</sup>       |
| rs4849887         | 2                | 121245122             | C/T                  | 0.1                      | 0.91(0.86-0.96)                 | 0.00107                | 0.1                       | 1                                    | 0.91(0.88-0.94)                  | 4.89x10 <sup>-09</sup>       | 2.04x10 <sup>-11</sup>       |
| rs2016394         | 2                | 172972971             | G/A                  | 0.47                     | 0.99(0.96-1.02)                 | 0.512                  | 0.48                      | 1                                    | 0.95(0.94-0.97)                  | 1.90x10 <sup>-06</sup>       | 8.11x10 <sup>-06</sup>       |
| <i>rs1550623*</i> | 2                | <i>174212894</i>      | <i>A/G</i>           | <i>0.16</i>              | <i>0.94(0.9-0.99)</i>           | <i>0.0146</i>          | <i>0.16</i>               | <i>1</i>                             | <i>0.95(0.92-0.97)</i>           | <i>2.88x10<sup>-05</sup></i> | <i>1.27x10<sup>-06</sup></i> |
| <i>rs1045485*</i> | 2                | <i>202149589</i>      | <i>G/C</i>           | <i>0.13</i>              | <i>0.91(0.87-0.96)</i>          | <i>0.000612</i>        | <i>0.13</i>               | <i>1</i>                             | <i>0.97(0.94-1)</i>              | <i>0.0463</i>                | <i>0.000689</i>              |
| rs13387042        | 2                | 217905832             | A/G                  | 0.49                     | 0.87(0.84-0.9)                  | 1.27x10 <sup>-16</sup> | 0.49                      | 1                                    | 0.88(0.86-0.9)                   | 8.91x10 <sup>-41</sup>       | 1.15x10 <sup>-55</sup>       |
| rs16857609        | 2                | 218296508             | C/T                  | 0.26                     | 1.08(1.04-1.12)                 | 3.08x10 <sup>-05</sup> | 0.26                      | 1                                    | 1.08(1.06-1.11)                  | 9.48x10 <sup>-1</sup>        | 1.41x10 <sup>-17</sup>       |
| rs6762644         | 3                | 4742276               | A/G                  | 0.39                     | 1.04(1.01-1.08)                 | 0.02                   | 0.4                       | 1                                    | 1.07(1.05-1.09)                  | 6.28x10 <sup>-11</sup>       | 8.58x10 <sup>-12</sup>       |

|                    |   |                |            |             |                        |                        |             |          |                        |                              |                              |
|--------------------|---|----------------|------------|-------------|------------------------|------------------------|-------------|----------|------------------------|------------------------------|------------------------------|
| rs4973768          | 3 | 27416013       | C/T        | 0.47        | 1.11(1.07-1.15)        | 7.45x10 <sup>-10</sup> | 0.47        | 1        | 1.1(1.08-1.12)         | 4.65x10 <sup>-22</sup>       | 2.68x10 <sup>-30</sup>       |
| rs12493607         | 3 | 30682939       | G/C        | 0.35        | 1.04(1-1.07)           | 0.0385                 | 0.34        | 1        | 1.06(1.04-1.08)        | 7.00x10 <sup>-08</sup>       | 1.13x10 <sup>-08</sup>       |
| rs1053338          | 3 | 63967900       | A/G        | 0.13        | 1.06(1.01-1.12)        | 0.016                  | 0.13        | 1        | 1.08(1.05-1.11)        | 1.65x10 <sup>-07</sup>       | 9.08x10 <sup>-9</sup>        |
| rs9790517          | 4 | 106084778      | C/T        | 0.22        | 1.09(1.05-1.14)        | 1.38x10 <sup>-05</sup> | 0.22        | 1        | 1.05(1.03-1.08)        | 6.85x10 <sup>-06</sup>       | 1.43x10 <sup>-09</sup>       |
| rs6828523          | 4 | 175846426      | C/A        | 0.12        | 0.9(0.85-0.95)         | 9.02x10 <sup>-05</sup> | 0.12        | 1        | 0.9(0.87-0.93)         | 2.77x10 <sup>-12</sup>       | 1.14Ex10 <sup>-15</sup>      |
| rs10069690         | 5 | 1279790        | C/T        | 0.26        | 1.04(0.98-1.1)         | 0.219                  | 0.26        | 1        | 1.06(1.04-1.09)        | 1.70x10 <sup>-08</sup>       | 1.10x10 <sup>-08</sup>       |
| <i>rs7726159*</i>  | 5 | <i>1282319</i> | <i>C/A</i> | <i>0.35</i> | <i>1(0.95-1.05)</i>    | <i>0.956</i>           | <i>0.34</i> | <i>1</i> | <i>1.04(1.02-1.06)</i> | <i>3.65x10<sup>-05</sup></i> | <i>0.000174</i>              |
| rs2736108          | 5 | 1297488        | C/T        | 0.27        | 0.94(0.89-0.99)        | 0.0137                 | 0.29        | 1        | 0.94(0.92-0.96)        | 5.47x10 <sup>-08</sup>       | 2.44x10 <sup>-09</sup>       |
| rs10941679         | 5 | 44706498       | A/G        | 0.25        | 1.13(1.08-1.18)        | 2.31x10 <sup>-07</sup> | 0.25        | 1        | 1.12(1.1-1.15)         | 3.20x10 <sup>-26</sup>       | 4.50x10 <sup>-32</sup>       |
| rs889312           | 5 | 56031884       | A/C        | 0.28        | 1.15(1.11-1.2)         | 2.26x10 <sup>-14</sup> | 0.28        | 1        | 1.12(1.1-1.15)         | 2.87x10 <sup>-27</sup>       | 1.19x10 <sup>-39</sup>       |
| rs10472076         | 5 | 58184061       | T/C        | 0.36        | 1.06(1.02-1.09)        | 0.00275                | 0.38        | 1        | 1.05(1.03-1.07)        | 1.82x10 <sup>-06</sup>       | 1.84x10 <sup>-08</sup>       |
| rs1353747          | 5 | 58337481       | T/G        | 0.1         | 0.92(0.87-0.98)        | 0.00698                | 0.1         | 1        | 0.92(0.89-0.95)        | 1.38x10 <sup>-06</sup>       | 3.19x10 <sup>-08</sup>       |
| rs1432679          | 5 | 158244083      | T/C        | 0.43        | 1.08(1.04-1.11)        | 2.20x10 <sup>-05</sup> | 0.43        | 1        | 1.07(1.05-1.09)        | 3.60x10 <sup>-12</sup>       | 3.93x10 <sup>-16</sup>       |
| <i>rs11242675*</i> | 6 | <i>1318878</i> | <i>T/C</i> | <i>0.38</i> | <i>0.95(0.92-0.98)</i> | <i>0.00362</i>         | <i>0.38</i> | <i>1</i> | <i>0.96(0.94-0.98)</i> | <i>1.07x10<sup>-05</sup></i> | <i>1.40x10<sup>-07</sup></i> |
| rs204247           | 6 | 13722523       | A/G        | 0.44        | 1.06(1.03-1.1)         | 0.000326               | 0.44        | 1        | 1.05(1.03-1.07)        | 2.71Ex10 <sup>-07</sup>      | 4.18x10 <sup>-10</sup>       |
| rs17529111         | 6 | 82128386       | T/C        | 0.21        | 1.1(1.05-1.15)         | 3.50x10 <sup>-05</sup> | 0.22        | 1        | 1.06(1.04-1.08)        | 4.90x10 <sup>-07</sup>       | 2.03x10 <sup>-10</sup>       |
| rs12662670         | 6 | 151918856      | T/G        | 0.08        | 1.22(1.14-1.29)        | 6.22x10 <sup>-10</sup> | 0.07        | 1        | 1.17(1.13-1.22)        | 1.03x10 <sup>-18</sup>       | 6.80x10 <sup>-27</sup>       |
| rs2046210          | 6 | 151948366      | G/A        | 0.35        | 1.13(1.09-1.17)        | 3.61x10 <sup>-12</sup> | 0.34        | 1        | 1.08(1.06-1.1)         | 2.13x10 <sup>-14</sup>       | 5.94x10 <sup>-24</sup>       |

|                   |           |                 |            |             |                        |                        |             |          |                        |                              |                              |
|-------------------|-----------|-----------------|------------|-------------|------------------------|------------------------|-------------|----------|------------------------|------------------------------|------------------------------|
| <i>rs6964587*</i> | 7         | <i>91630620</i> | <i>G/T</i> | <i>0.39</i> | <i>1.03(0.99-1.06)</i> | <i>0.11</i>            | <i>0.39</i> | <i>1</i> | <i>1.05(1.03-1.07)</i> | <i>1.26x10<sup>-06</sup></i> | <i>4.90x10<sup>-07</sup></i> |
| rs720475          | 7         | 144074929       | G/A        | 0.24        | 0.95(0.91-0.99)        | 0.00834                | 0.25        | 1        | 0.94(0.92-0.96)        | 1.23x10 <sup>-08</sup>       | 3.85x10 <sup>-10</sup>       |
| rs9693444         | 8         | 29509616        | C/A        | 0.32        | 1.06(1.02-1.1)         | 0.00209                | 0.32        | 1        | 1.07(1.05-1.09)        | 1.09x10 <sup>-10</sup>       | 1.00x10 <sup>-12</sup>       |
| rs6472903         | 8         | 76230301        | T/G        | 0.17        | 0.91(0.87-0.96)        | 9.46x10 <sup>-05</sup> | 0.18        | 1        | 0.91(0.89-0.93)        | 2.74x10 <sup>-13</sup>       | 1.21x10 <sup>-16</sup>       |
| rs2943559         | 8         | 76417937        | A/G        | 0.07        | 1.19(1.11-1.27)        | 1.36x10 <sup>-07</sup> | 0.07        | 1        | 1.13(1.09-1.17)        | 6.81x10 <sup>-11</sup>       | 1.41x10 <sup>-16</sup>       |
| rs13281615        | 8         | 128355618       | A/G        | 0.41        | 1.12(1.08-1.15)        | 1.91x10 <sup>-10</sup> | 0.4         | 1        | 1.1(1.08-1.12)         | 3.26x10 <sup>-22</sup>       | 5.52x10 <sup>-31</sup>       |
| rs11780156        | 8         | 129194641       | C/T        | 0.17        | 1.08(1.03-1.13)        | 0.000763               | 0.16        | 1        | 1.07(1.04-1.09)        | 7.67x10 <sup>-07</sup>       | 2.42x10 <sup>-09</sup>       |
| rs1011970         | 9         | 22062134        | G/T        | 0.17        | 1.11(1.06-1.16)        | 6.57x10 <sup>-06</sup> | 0.17        | 1        | 1.06(1.03-1.08)        | 2.68x10 <sup>-05</sup>       | 4.02x10 <sup>-09</sup>       |
| rs10759243        | 9         | 110306115       | C/A        | 0.27        | 1.08(1.03-1.12)        | 0.000708               | 0.29        | 1        | 1.05(1.03-1.08)        | 6.92x10 <sup>-07</sup>       | 2.69x10 <sup>-09</sup>       |
| rs865686          | 9         | 110888478       | T/G        | 0.37        | 0.91(0.88-0.94)        | 1.96x10 <sup>-08</sup> | 0.38        | 1        | 0.9(0.88-0.92)         | 4.49x10 <sup>-27</sup>       | 6.42x10 <sup>-34</sup>       |
| <i>rs2380205*</i> | <i>10</i> | <i>5886734</i>  | <i>C/T</i> | <i>0.44</i> | <i>0.95(0.92-0.98)</i> | <i>0.00147</i>         | <i>0.44</i> | <i>1</i> | <i>0.99(0.97-1.01)</i> | <i>0.197</i>                 | <i>0.00699</i>               |
| rs7072776         | 10        | 22032942        | G/A        | 0.28        | 1.09(1.05-1.14)        | 1.79x10 <sup>-06</sup> | 0.29        | 1        | 1.07(1.05-1.09)        | 7.66x10 <sup>-10</sup>       | 1.29x10 <sup>-14</sup>       |
| rs11814448        | 10        | 22315843        | A/C        | 0.02        | 1.35(1.17-1.56)        | 3.83x10 <sup>-05</sup> | 0.02        | 1        | 1.27(1.19-1.36)        | 2.73x10 <sup>-13</sup>       | 6.47x10 <sup>-17</sup>       |
| rs10995190        | 10        | 64278682        | G/A        | 0.15        | 0.86(0.82-0.91)        | 1.30x10 <sup>-09</sup> | 0.16        | 1        | 0.86(0.83-0.88)        | 1.60x10 <sup>-29</sup>       | 1.50x10 <sup>-37</sup>       |
| rs704010          | 10        | 80841148        | C/T        | 0.39        | 1.11(1.08-1.15)        | 6.32x10 <sup>-10</sup> | 0.38        | 1        | 1.08(1.06-1.1)         | 2.94x10 <sup>-15</sup>       | 3.15x10 <sup>-23</sup>       |
| rs7904519         | 10        | 114773927       | A/G        | 0.45        | 1.09(1.05-1.12)        | 1.20x10 <sup>-06</sup> | 0.46        | 1        | 1.05(1.03-1.07)        | 4.74x10 <sup>-08</sup>       | 9.21x10 <sup>-13</sup>       |
| rs11199914        | 10        | 123093901       | C/T        | 0.32        | 0.94(0.91-0.97)        | 0.000822               | 0.32        | 1        | 0.95(0.93-0.97)        | 2.25x10 <sup>-06</sup>       | 8.20x10 <sup>-09</sup>       |
| rs2981579         | 10        | 123337335       | G/A        | 0.42        | 1.25(1.21-1.29)        | 2.21x10 <sup>-37</sup> | 0.4         | 1        | 1.27(1.24-1.29)        | 1.29x10 <sup>-128</sup>      | 5.89x10 <sup>-164</sup>      |



|                    |           |                 |            |             |                        |                        |             |          |                        |                              |                              |
|--------------------|-----------|-----------------|------------|-------------|------------------------|------------------------|-------------|----------|------------------------|------------------------------|------------------------------|
| rs3817198          | 11        | 1909006         | T/C        | 0.32        | 1.07(1.03-1.11)        | 0.000454               | 0.31        | 1        | 1.07(1.05-1.09)        | 1.09x10 <sup>-10</sup>       | 2.09x10 <sup>-13</sup>       |
| rs3903072          | 11        | 65583066        | G/T        | 0.47        | 0.93(0.9-0.97)         | 5.50x10 <sup>-05</sup> | 0.47        | 1        | 0.95(0.93-0.97)        | 3.02x10 <sup>-07</sup>       | 1.14x10 <sup>-10</sup>       |
| rs78540526         | 11        | 69331418        | C/T        | 0.08        | 1.42(1.33-1.51)        | 2.30x10 <sup>-26</sup> | 0.08        | 0.99     | 1.34(1.29-1.38)        | 1.65x10 <sup>-62</sup>       | 1.65x10 <sup>-86</sup>       |
| rs554219           | 11        | 69331642        | C/G        | 0.13        | 1.28(1.22-1.34)        | 2.66x10 <sup>-23</sup> | 0.12        | 1        | 1.26(1.23-1.3)         | 6.25x10 <sup>-60</sup>       | 2.03x10 <sup>-81</sup>       |
| rs75915166         | 11        | 69379161        | C/A        | 0.06        | 1.36(1.27-1.47)        | 3.04x10 <sup>-16</sup> | 0.06        | 1        | 1.31(1.26-1.36)        | 2.40x10 <sup>-43</sup>       | 1.00x10 <sup>-57</sup>       |
| rs11820646         | 11        | 129461171       | C/T        | 0.41        | 0.94(0.9-0.97)         | 0.00013                | 0.41        | 1        | 0.95(0.93-0.97)        | 1.72x10 <sup>-07</sup>       | 1.22x10 <sup>-10</sup>       |
| <i>rs12422552*</i> | <i>12</i> | <i>14413931</i> | <i>G/C</i> | <i>0.26</i> | <i>1.08(1.04-1.12)</i> | <i>0.000104</i>        | <i>0.26</i> | <i>1</i> | <i>1.04(1.02-1.07)</i> | <i>9.42x10<sup>-05</sup></i> | <i>1.14x10<sup>-07</sup></i> |
| rs10771399         | 12        | 28155080        | A/G        | 0.11        | 0.8(0.75-0.84)         | 2.22x10 <sup>-14</sup> | 0.12        | 1        | 0.86(0.83-0.89)        | 2.05x10 <sup>-22</sup>       | 4.76x10 <sup>-34</sup>       |
| rs17356907         | 12        | 96027759        | A/G        | 0.3         | 0.92(0.89-0.96)        | 2.34x10 <sup>-05</sup> | 0.3         | 1        | 0.91(0.9-0.93)         | 5.62x10 <sup>-17</sup>       | 7.02x10 <sup>-21</sup>       |
| rs1292011          | 12        | 115836522       | A/G        | 0.42        | 0.92(0.89-0.95)        | 2.62x10 <sup>-06</sup> | 0.42        | 1        | 0.92(0.9-0.94)         | 1.22x10 <sup>-16</sup>       | 1.72x10 <sup>-21</sup>       |
| <i>rs11571833*</i> | <i>13</i> | <i>32972626</i> | <i>A/T</i> | <i>0.01</i> | <i>1.22(0.96-1.54)</i> | <i>0.0999</i>          | <i>0.01</i> | <i>1</i> | <i>1.27(1.15-1.4)</i>  | <i>2.16x10<sup>-06</sup></i> | <i>5.57x10<sup>-07</sup></i> |
| rs2236007          | 14        | 37132769        | G/A        | 0.2         | 0.93(0.89-0.97)        | 0.000452               | 0.21        | 1        | 0.93(0.91-0.95)        | 4.74x10 <sup>-10</sup>       | 8.84x10 <sup>-13</sup>       |
| rs2588809          | 14        | 68660428        | C/T        | 0.15        | 1.02(0.97-1.07)        | 0.395                  | 0.16        | 1        | 1.08(1.05-1.11)        | 3.72x10 <sup>-09</sup>       | 2.28x10 <sup>-08</sup>       |
| rs999737           | 14        | 69034682        | C/T        | 0.23        | 0.88(0.84-0.91)        | 1.06x10 <sup>-10</sup> | 0.23        | 1        | 0.92(0.9-0.94)         | 4.10x10 <sup>-13</sup>       | 1.98x10 <sup>-21</sup>       |
| rs941764           | 14        | 91841069        | A/G        | 0.33        | 1.04(1-1.08)           | 0.0482                 | 0.34        | 1        | 1.07(1.05-1.09)        | 2.37x10 <sup>-10</sup>       | 6.22x10 <sup>-11</sup>       |
| rs3803662          | 16        | 52586341        | G/A        | 0.28        | 1.25(1.2-1.29)         | 1.08x10 <sup>-32</sup> | 0.26        | 1        | 1.24(1.21-1.26)        | 2.71x10 <sup>-86</sup>       | 4.15x10 <sup>-117</sup>      |
| rs17817449         | 16        | 53813367        | T/G        | 0.4         | 0.95(0.92-0.99)        | 0.00517                | 0.4         | 1        | 0.93(0.91-0.95)        | 6.90x10 <sup>-13</sup>       | 2.47x10 <sup>-14</sup>       |

|                          |    |          |     |      |                 |                        |        |   |                 |                        |                        |
|--------------------------|----|----------|-----|------|-----------------|------------------------|--------|---|-----------------|------------------------|------------------------|
| rs11075995               | 16 | 53855291 | T/A | 0.23 | 1.08(1.04-1.12) | 0.000218               | 0.24   | 1 | 1.04(1.02-1.06) | 0.000496               | 1.36x10 <sup>-06</sup> |
| rs13329835               | 16 | 80650805 | A/G | 0.22 | 1.11(1.06-1.15) | 4.41x10 <sup>-07</sup> | 0.22   | 1 | 1.08(1.06-1.11) | 6.08x10 <sup>-12</sup> | 2.36x10 <sup>-17</sup> |
| rs6504950                | 17 | 53056471 | G/A | 0.28 | 0.93(0.9-0.96)  | 0.00012                | 0.28   | 1 | 0.94(0.92-0.96) | 8.15x10 <sup>-09</sup> | 4.76x10 <sup>-12</sup> |
| rs527616                 | 18 | 24337424 | G/C | 0.37 | 0.9(0.86-0.93)  | 4.27x10 <sup>-08</sup> | 0.38   | 1 | 0.95(0.93-0.97) | 1.47x10 <sup>-07</sup> | 7.50x10 <sup>-13</sup> |
| rs1436904                | 18 | 24570667 | T/G | 0.41 | 0.95(0.92-0.98) | 0.00174                | 0.4    | 1 | 0.96(0.94-0.97) | 4.73x10 <sup>-06</sup> | 3.23x10 <sup>-08</sup> |
| rs8170                   | 19 | 17389704 | G/A | 0.19 | 1.09(1.05-1.14) | 7.75x10 <sup>-05</sup> | 0.19   | 1 | 1.04(1.02-1.07) | 0.000997               | 1.66x10 <sup>-06</sup> |
| rs2363956                | 19 | 17394124 | G/T | 0.49 | 1.08(1.04-1.12) | 9.58x10 <sup>-06</sup> | 0.49   | 1 | 1.03(1.01-1.05) | 0.00368                | 2.49x10 <sup>-06</sup> |
| rs4808801                | 19 | 18571141 | A/G | 0.34 | 0.95(0.92-0.99) | 0.00764                | 0.35   | 1 | 0.93(0.91-0.94) | 5.89x10 <sup>-14</sup> | 4.12x10 <sup>-15</sup> |
| rs3760982                | 19 | 44286513 | G/A | 0.47 | 1.04(1.01-1.07) | 0.0218                 | 0.46   | 1 | 1.05(1.03-1.07) | 9.64x10 <sup>-08</sup> | 8.00x10 <sup>-09</sup> |
| rs2823093                | 21 | 16520832 | G/A | 0.26 | 0.95(0.92-0.99) | 0.0154                 | 0.27   | 1 | 0.93(0.91-0.95) | 2.39x10 <sup>-12</sup> | 3.18x10 <sup>-13</sup> |
| rs17879961 <sup>10</sup> | 22 | 29121087 | A/G | 0.03 | 0.93(0.7-1.23)  | 0.593                  | 0.0049 | 1 | 1.37(1.21-1.55) | 7.85x10 <sup>-07</sup> | 1.67x10 <sup>-5</sup>  |
| rs132390                 | 22 | 29621477 | T/C | 0.03 | 1.2(1.07-1.34)  | 0.00163                | 0.04   | 1 | 1.14(1.08-1.2)  | 3.79x10 <sup>-07</sup> | 3.22x10 <sup>-09</sup> |
| rs6001930                | 22 | 40876234 | T/C | 0.1  | 1.17(1.1-1.23)  | 4.00x10 <sup>-08</sup> | 0.11   | 1 | 1.12(1.09-1.16) | 3.53x10 <sup>-14</sup> | 1.71x10 <sup>-20</sup> |

<sup>1</sup>SNPs marked in bold and asterisked do not reach  $P < 5 \times 10^{-8}$  for overall, ER-positive or ER-negative breast cancer.

<sup>2</sup>Chromosome.

<sup>3</sup>Build 37 position.

<sup>4</sup>Reference/effect allele (forward strand).

<sup>5</sup>Mean frequency of the effect allele.

<sup>6</sup>Per-allele OR for the effect allele.

<sup>7</sup>1 degree of freedom trend test.

<sup>8</sup>Mean imputation  $r^2$  from IMPUTE2 ( $r^2=1$  for genotyped SNPs).

<sup>9</sup>Combined  $P$ -value based on meta-analysis of the GWAS and iCOGS results.

<sup>10</sup>rs17879961 was not included in the main analysis as MAF <0.005 in iCOGS.

\* Variants that do not reach  $P < 5 \times 10^{-8}$  in overall, ER-negative or ER-positive disease

**Supplementary Table 3b:** Association results for ER-positive breast cancer.

| SNP <sup>1</sup>  | Chr <sup>2</sup> | Position <sup>3</sup> | Alleles <sup>4</sup> | MAF GWAS <sup>5</sup> | OR GWAS (95%CI) <sup>6</sup> | GWAS P <sup>7</sup>    | MAF iCOGS <sup>5</sup> | r <sup>2</sup> iCOGS <sup>8</sup> | OR iCOGS (95% CI) <sup>6</sup> | iCOGS P <sup>7</sup>   | Combined P <sup>9</sup> |
|-------------------|------------------|-----------------------|----------------------|-----------------------|------------------------------|------------------------|------------------------|-----------------------------------|--------------------------------|------------------------|-------------------------|
| rs616488          | 1                | 10566215              | A/G                  | 0.32                  | 0.98(0.9-1.07)               | 0.661                  | 0.33                   | 1                                 | 0.96(0.94-0.98)                | 0.00106                | 0.00107                 |
| rs11552449        | 1                | 114448389             | C/T                  | 0.17                  | 1.12(1-1.24)                 | 0.0423                 | 0.16                   | 1                                 | 1.08(1.05-1.11)                | 3.06x10 <sup>-07</sup> | 4.30x10 <sup>-08</sup>  |
| rs11249433        | 1                | 121280613             | A/G                  | 0.39                  | 1.11(1.03-1.21)              | 0.00988                | 0.4                    | 1                                 | 1.12(1.09-1.14)                | 5.37x10 <sup>-22</sup> | 1.87x10 <sup>-23</sup>  |
| rs6678914         | 1                | 202187176             | G/A                  | 0.43                  | 1.01(0.93-1.1)               | 0.754                  | 0.41                   | 1                                 | 1.01(0.99-1.04)                | 0.308                  | 0.286                   |
| rs4245739         | 1                | 204518842             | A/C                  | 0.24                  | 0.94(0.85-1.03)              | 0.195                  | 0.26                   | 1                                 | 1(0.98-1.03)                   | 0.878                  | 0.847                   |
| rs12710696        | 2                | 19320803              | C/T                  | 0.35                  | 1.06(0.98-1.15)              | 0.159                  | 0.36                   | 1                                 | 1.01(0.98-1.03)                | 0.531                  | 0.325                   |
| rs4849887         | 2                | 121245122             | C/T                  | 0.09                  | 0.89(0.77-1.02)              | 0.102                  | 0.1                    | 1                                 | 0.91(0.88-0.95)                | 1.73x10 <sup>-06</sup> | 4.51x10 <sup>-07</sup>  |
| rs2016394         | 2                | 172972971             | G/A                  | 0.48                  | 0.94(0.86-1.01)              | 0.1                    | 0.48                   | 1                                 | 0.94(0.92-0.96)                | 1.98x10 <sup>-08</sup> | 4.93x10 <sup>-09</sup>  |
| <i>rs1550623*</i> | <i>2</i>         | <i>174212894</i>      | <i>A/G</i>           | <i>0.16</i>           | <i>0.88(0.79-0.99)</i>       | <i>0.0289</i>          | <i>0.16</i>            | <i>1</i>                          | <i>0.95(0.92-0.98)</i>         | <i>0.000877</i>        | <i>0.000148</i>         |
| <i>rs1045485*</i> | <i>2</i>         | <i>202149589</i>      | <i>G/C</i>           | <i>0.13</i>           | <i>0.92(0.82-1.04)</i>       | <i>0.205</i>           | <i>0.13</i>            | <i>1</i>                          | <i>0.98(0.94-1.01)</i>         | <i>0.181</i>           | <i>0.103</i>            |
| rs13387042        | 2                | 217905832             | A/G                  | 0.49                  | 0.82(0.75-0.88)              | 5.46x10 <sup>-07</sup> | 0.49                   | 1                                 | 0.86(0.84-0.88)                | 2.26x10 <sup>-37</sup> | 1.90x10 <sup>-42</sup>  |
| rs16857609        | 2                | 218296508             | C/T                  | 0.28                  | 1.02(0.93-1.11)              | 0.693                  | 0.26                   | 1                                 | 1.09(1.06-1.11)                | 2.35x10 <sup>-10</sup> | 5.46x10 <sup>-10</sup>  |
| rs6762644         | 3                | 4742276               | A/G                  | 0.39                  | 1.13(1.05-1.23)              | 0.00226                | 0.4                    | 1                                 | 1.07(1.05-1.09)                | 8.05x10 <sup>-09</sup> | 1.74x10 <sup>-10</sup>  |
| rs4973768         | 3                | 27416013              | C/T                  | 0.46                  | 1.15(1.06-1.25)              | 0.000491               | 0.47                   | 1                                 | 1.1(1.08-1.13)                 | 1.05x10 <sup>-17</sup> | 3.91x10 <sup>-20</sup>  |
| rs12493607        | 3                | 30682939              | G/C                  | 0.35                  | 1.05(0.96-1.14)              | 0.261                  | 0.34                   | 1                                 | 1.07(1.04-1.09)                | 5.67x10 <sup>-08</sup> | 3.18x10 <sup>-08</sup>  |
| rs1053338         | 3                | 63967900              | A/G                  | 0.12                  | 1.09(0.96-1.23)              | 0.18                   | 0.13                   | 1                                 | 1.04(1.08-1.11)                | 2.86x10 <sup>-06</sup> | 1.11x10 <sup>-06</sup>  |

|             |   |           |     |      |                 |          |      |   |                 |                        |                        |
|-------------|---|-----------|-----|------|-----------------|----------|------|---|-----------------|------------------------|------------------------|
| rs9790517   | 4 | 106084778 | C/T | 0.23 | 1.08(0.98-1.18) | 0.139    | 0.22 | 1 | 1.06(1.03-1.09) | 1.54x10 <sup>-05</sup> | 5.07x10 <sup>-06</sup> |
| rs6828523   | 4 | 175846426 | C/A | 0.12 | 0.86(0.76-0.98) | 0.0191   | 0.12 | 1 | 0.87(0.84-0.9)  | 1.54x10 <sup>-14</sup> | 9.56x10 <sup>-16</sup> |
| rs10069690  | 5 | 1279790   | C/T | 0.27 | 1(0.9-1.11)     | 0.946    | 0.26 | 1 | 1.04(1.01-1.06) | 0.00778                | 0.0101                 |
| rs7726159*  | 5 | 1282319   | C/A | 0.35 | 0.98(0.89-1.08) | 0.709    | 0.34 | 1 | 1.03(1.01-1.06) | 0.00676                | 0.0112                 |
| rs2736108   | 5 | 1297488   | C/T | 0.26 | 0.98(0.88-1.09) | 0.724    | 0.29 | 1 | 0.96(0.94-0.99) | 0.00239                | 0.00239                |
| rs10941679  | 5 | 44706498  | A/G | 0.25 | 1.19(1.09-1.31) | 0.000236 | 0.25 | 1 | 1.15(1.12-1.18) | 2.84x10 <sup>-28</sup> | 4.00x10 <sup>-31</sup> |
| rs889312    | 5 | 56031884  | A/C | 0.28 | 1.07(0.98-1.17) | 0.124    | 0.28 | 1 | 1.14(1.12-1.17) | 1.39x10 <sup>-26</sup> | 1.07x10 <sup>-26</sup> |
| rs10472076  | 5 | 58184061  | T/C | 0.37 | 1.1(1.01-1.19)  | 0.027    | 0.38 | 1 | 1.04(1.01-1.06) | 0.00191                | 0.000339               |
| rs1353747   | 5 | 58337481  | T/G | 0.09 | 0.95(0.82-1.09) | 0.442    | 0.1  | 1 | 0.93(0.89-0.97) | 0.00025                | 0.000187               |
| rs1432679   | 5 | 158244083 | T/C | 0.44 | 1.07(0.99-1.16) | 0.102    | 0.43 | 1 | 1.07(1.04-1.09) | 8.23x10 <sup>-09</sup> | 2.08x10 <sup>-09</sup> |
| rs11242675* | 6 | 1318878   | T/C | 0.4  | 0.97(0.89-1.05) | 0.455    | 0.38 | 1 | 0.96(0.94-0.98) | 0.000754               | 0.000572               |
| rs204247    | 6 | 13722523  | A/G | 0.44 | 1.03(0.95-1.12) | 0.501    | 0.44 | 1 | 1.07(1.04-1.09) | 3.55x10 <sup>-08</sup> | 3.98x10 <sup>-08</sup> |
| rs17529111  | 6 | 82128386  | T/C | 0.23 | 1.13(1.03-1.24) | 0.0124   | 0.22 | 1 | 1.06(1.03-1.09) | 3.61x10 <sup>-05</sup> | 3.22x10 <sup>-06</sup> |
| rs12662670  | 6 | 151918856 | T/G | 0.07 | 1.12(0.96-1.32) | 0.157    | 0.07 | 1 | 1.13(1.08-1.18) | 2.05x10 <sup>-08</sup> | 7.33x10 <sup>-09</sup> |
| rs2046210   | 6 | 151948366 | G/A | 0.31 | 1.1(1.01-1.19)  | 0.0342   | 0.34 | 1 | 1.06(1.03-1.08) | 1.00x10 <sup>-05</sup> | 1.42x10 <sup>-06</sup> |
| rs6964587*  | 7 | 91630620  | G/T | 0.39 | 1.03(0.94-1.11) | 0.55     | 0.39 | 1 | 1.06(1.04-1.08) | 5.78x10 <sup>-07</sup> | 6.46x10 <sup>-07</sup> |
| rs720475    | 7 | 144074929 | G/A | 0.25 | 0.99(0.9-1.09)  | 0.852    | 0.25 | 1 | 0.93(0.91-0.96) | 1.03x10 <sup>-07</sup> | 2.34x10 <sup>-07</sup> |
| rs9693444   | 8 | 29509616  | C/A | 0.33 | 1.05(0.96-1.14) | 0.264    | 0.32 | 1 | 1.07(1.05-1.1)  | 1.28x10 <sup>-08</sup> | 7.49x10 <sup>-09</sup> |
| rs6472903   | 8 | 76230301  | T/G | 0.18 | 0.89(0.8-0.99)  | 0.0254   | 0.18 | 1 | 0.91(0.88-0.94) | 1.14x10 <sup>-09</sup> | 1.00x10 <sup>-10</sup> |

|            |    |           |     |      |                 |                        |      |      |                 |                         |                         |
|------------|----|-----------|-----|------|-----------------|------------------------|------|------|-----------------|-------------------------|-------------------------|
| rs2943559  | 8  | 76417937  | A/G | 0.07 | 1.06(0.9-1.24)  | 0.517                  | 0.07 | 1    | 1.13(1.09-1.18) | 4.64x10 <sup>-09</sup>  | 5.38x10 <sup>-09</sup>  |
| rs13281615 | 8  | 128355618 | A/G | 0.4  | 1.18(1.09-1.28) | 7.04E-05               | 0.4  | 1    | 1.11(1.08-1.13) | 5.45x10 <sup>-18</sup>  | 5.73x10 <sup>-21</sup>  |
| rs11780156 | 8  | 129194641 | C/T | 0.15 | 1.15(1.03-1.29) | 0.012                  | 0.16 | 1    | 1.07(1.04-1.11) | 5.31x10 <sup>-06</sup>  | 4.39x10 <sup>-07</sup>  |
| rs1011970  | 9  | 22062134  | G/T | 0.18 | 1.08(0.97-1.2)  | 0.151                  | 0.17 | 1    | 1.04(1.01-1.08) | 0.00438                 | 0.00173                 |
| rs10759243 | 9  | 110306115 | C/A | 0.28 | 1.02(0.93-1.11) | 0.707                  | 0.29 | 1    | 1.08(1.05-1.11) | 1.48x10 <sup>-09</sup>  | 2.91x10 <sup>-09</sup>  |
| rs865686   | 9  | 110888478 | T/G | 0.38 | 0.86(0.79-0.94) | 0.000502               | 0.38 | 1    | 0.87(0.85-0.89) | 2.14x10 <sup>-30</sup>  | 4.93x10 <sup>-33</sup>  |
| rs2380205* | 10 | 5886734   | C/T | 0.45 | 0.91(0.84-0.99) | 0.0273                 | 0.44 | 1    | 0.98(0.96-1)    | 0.062                   | 0.0167                  |
| rs7072776  | 10 | 22032942  | G/A | 0.26 | 1.14(1.04-1.25) | 0.00436                | 0.28 | 1    | 1.09(1.06-1.12) | 1.17x10 <sup>-11</sup>  | 2.96x10 <sup>-13</sup>  |
| rs11814448 | 10 | 22315843  | A/C | 0.02 | 1.11(0.8-1.55)  | 0.53                   | 0.02 | 1    | 1.27(1.18-1.37) | 6.44E-10                | 7.08x10 <sup>-10</sup>  |
| rs10995190 | 10 | 64278682  | G/A | 0.17 | 0.84(0.75-0.93) | 0.00153                | 0.16 | 1    | 0.85(0.83-0.88) | 9.68x10 <sup>-23</sup>  | 6.37x10 <sup>-25</sup>  |
| rs704010   | 10 | 80841148  | C/T | 0.37 | 1.07(0.98-1.16) | 0.132                  | 0.38 | 1    | 1.1(1.07-1.12)  | 2.09x10 <sup>-15</sup>  | 8.34x10 <sup>-16</sup>  |
| rs7904519  | 10 | 114773927 | A/G | 0.45 | 1.11(1.02-1.2)  | 0.0116                 | 0.46 | 1    | 1.04(1.02-1.07) | 0.000168                | 1.70x10 <sup>-05</sup>  |
| rs11199914 | 10 | 123093901 | C/T | 0.34 | 0.93(0.85-1.01) | 0.1                    | 0.32 | 1    | 0.93(0.91-0.96) | 5.50x10 <sup>-08</sup>  | 1.38x10 <sup>-08</sup>  |
| rs2981579  | 10 | 123337335 | G/A | 0.41 | 1.37(1.26-1.49) | 5.12x10 <sup>-14</sup> | 0.4  | 1    | 1.33(1.3-1.36)  | 9.36x10 <sup>-133</sup> | 5.79x10 <sup>-145</sup> |
| rs3817198  | 11 | 1909006   | T/C | 0.3  | 1.01(0.92-1.1)  | 0.888                  | 0.31 | 1    | 1.09(1.06-1.11) | 1.55x10 <sup>-11</sup>  | 6.16x10 <sup>-11</sup>  |
| rs3903072  | 11 | 65583066  | G/T | 0.5  | 0.9(0.83-0.97)  | 0.00878                | 0.47 | 1    | 0.95(0.92-0.97) | 1.11x10 <sup>-06</sup>  | 6.87x10 <sup>-08</sup>  |
| rs78540526 | 11 | 69331418  | C/T | 0.08 | 1.37(1.19-1.59) | 1.87E-05               | 0.08 | 0.99 | 1.41(1.35-1.46) | 2.31x10 <sup>-66</sup>  | 2.50x10 <sup>-70</sup>  |
| rs554219   | 11 | 69331642  | C/G | 0.13 | 1.35(1.2-1.51)  | 6.55E-07               | 0.12 | 1    | 1.32(1.28-1.37) | 9.07x10 <sup>-65</sup>  | 3.82x10 <sup>-70</sup>  |
| rs75915166 | 11 | 69379161  | C/A | 0.06 | 1.23(1.03-1.46) | 0.0204                 | 0.06 | 1    | 1.38(1.32-1.44) | 9.52x10 <sup>-46</sup>  | 1.48x10 <sup>-46</sup>  |

|             |    |           |     |      |                 |          |      |   |                 |                        |                        |
|-------------|----|-----------|-----|------|-----------------|----------|------|---|-----------------|------------------------|------------------------|
| rs11820646  | 11 | 129461171 | C/T | 0.43 | 0.92(0.85-1)    | 0.0514   | 0.41 | 1 | 0.95(0.93-0.97) | 2.68x10 <sup>-06</sup> | 4.48x10 <sup>-07</sup> |
| rs12422552* | 12 | 14413931  | G/C | 0.25 | 1.14(1.04-1.25) | 0.00592  | 0.26 | 1 | 1.04(1.01-1.07) | 0.00204                | 0.000217               |
| rs10771399  | 12 | 28155080  | A/G | 0.11 | 0.82(0.72-0.94) | 0.00389  | 0.12 | 1 | 0.88(0.85-0.91) | 5.77x10 <sup>-13</sup> | 1.23x10 <sup>-14</sup> |
| rs17356907  | 12 | 96027759  | A/G | 0.31 | 0.89(0.82-0.98) | 0.0157   | 0.3  | 1 | 0.91(0.89-0.93) | 1.47x10 <sup>-14</sup> | 7.99x10 <sup>-16</sup> |
| rs1292011   | 12 | 115836522 | A/G | 0.41 | 0.88(0.82-0.96) | 0.00346  | 0.42 | 1 | 0.91(0.89-0.93) | 8.75x10 <sup>-17</sup> | 1.36x10 <sup>-18</sup> |
| rs11571833* | 13 | 32972626  | A/T | 0.01 | 1.64(1.03-2.62) | 0.0374   | 0.01 | 1 | 1.26(1.12-1.41) | 0.00013                | 2.47x10 <sup>-05</sup> |
| rs2236007   | 14 | 37132769  | G/A | 0.2  | 0.87(0.78-0.96) | 0.00649  | 0.21 | 1 | 0.91(0.89-0.94) | 1.55x10 <sup>-10</sup> | 5.48x10 <sup>-12</sup> |
| rs2588809   | 14 | 68660428  | C/T | 0.16 | 1.04(0.93-1.16) | 0.467    | 0.16 | 1 | 1.09(1.06-1.13) | 4.89x10 <sup>-09</sup> | 5.39x10 <sup>-09</sup> |
| rs999737    | 14 | 69034682  | C/T | 0.23 | 0.86(0.78-0.94) | 0.00153  | 0.23 | 1 | 0.91(0.89-0.94) | 5.00x10 <sup>-11</sup> | 6.90x10 <sup>-13</sup> |
| rs941764    | 14 | 91841069  | A/G | 0.34 | 1.07(0.99-1.17) | 0.104    | 0.34 | 1 | 1.07(1.05-1.1)  | 3.66x10 <sup>-09</sup> | 9.41x10 <sup>-10</sup> |
| rs3803662   | 16 | 52586341  | G/A | 0.28 | 1.28(1.17-1.39) | 3.43E-08 | 0.26 | 1 | 1.26(1.23-1.29) | 4.02x10 <sup>-73</sup> | 9.98x10 <sup>-80</sup> |
| rs17817449  | 16 | 53813367  | T/G | 0.4  | 0.98(0.9-1.06)  | 0.552    | 0.4  | 1 | 0.93(0.91-0.96) | 5.77x10 <sup>-09</sup> | 8.03x10 <sup>-09</sup> |
| rs11075995  | 16 | 53855291  | T/A | 0.25 | 1.06(0.96-1.16) | 0.235    | 0.24 | 1 | 1.03(1-1.05)    | 0.0473                 | 0.0258                 |
| rs13329835  | 16 | 80650805  | A/G | 0.23 | 1.09(0.99-1.2)  | 0.0716   | 0.22 | 1 | 1.09(1.06-1.12) | 1.64x10 <sup>-10</sup> | 3.12x10 <sup>-11</sup> |
| rs6504950   | 17 | 53056471  | G/A | 0.27 | 0.95(0.87-1.04) | 0.279    | 0.28 | 1 | 0.93(0.91-0.95) | 2.94x10 <sup>-08</sup> | 1.79x10 <sup>-08</sup> |
| rs527616    | 18 | 24337424  | G/C | 0.41 | 0.9(0.82-0.98)  | 0.0118   | 0.38 | 1 | 0.95(0.93-0.98) | 4.49x10 <sup>-05</sup> | 4.28x10 <sup>-06</sup> |
| rs1436904   | 18 | 24570667  | T/G | 0.39 | 0.94(0.87-1.03) | 0.177    | 0.4  | 1 | 0.94(0.92-0.96) | 1.44x10 <sup>-07</sup> | 5.65x10 <sup>-08</sup> |
| rs8170      | 19 | 17389704  | G/A | 0.2  | 0.95(0.85-1.05) | 0.285    | 0.19 | 1 | 1.01(0.98-1.04) | 0.597                  | 0.825                  |
| rs2363956   | 19 | 17394124  | G/T | 0.46 | 0.97(0.89-1.05) | 0.396    | 0.49 | 1 | 1(0.98-1.02)    | 0.946                  | 0.767                  |

|            |    |          |     |      |                 |       |        |   |                 |                        |                        |
|------------|----|----------|-----|------|-----------------|-------|--------|---|-----------------|------------------------|------------------------|
| rs4808801  | 19 | 18571141 | A/G | 0.35 | 0.95(0.87-1.03) | 0.238 | 0.35   | 1 | 0.93(0.91-0.95) | 3.82x10 <sup>-10</sup> | 2.18x10 <sup>-10</sup> |
| rs3760982  | 19 | 44286513 | G/A | 0.45 | 1.07(0.99-1.16) | 0.102 | 0.46   | 1 | 1.06(1.04-1.08) | 5.08x10 <sup>-07</sup> | 1.30x10 <sup>-07</sup> |
| rs2823093  | 21 | 16520832 | G/A | 0.27 | 0.97(0.87-1.07) | 0.546 | 0.27   | 1 | 0.91(0.89-0.94) | 3.18x10 <sup>-12</sup> | 4.81x10 <sup>-12</sup> |
| rs17879961 | 22 | 29121087 | A/G | 0.04 | 0.89(0.57-1.36) | 0.582 | 0.0049 | 1 | 1.51(1.31-1.73) | 3.49x10 <sup>-09</sup> | 2.81x10 <sup>-08</sup> |
| rs132390   | 22 | 29621477 | T/C | 0.04 | 1.17(0.93-1.48) | 0.177 | 0.04   | 1 | 1.14(1.08-1.21) | 8.44x10 <sup>-06</sup> | 3.35x10 <sup>-06</sup> |
| rs6001930  | 22 | 40876234 | T/C | 0.12 | 1.08(0.95-1.22) | 0.24  | 0.11   | 1 | 1.12(1.08-1.16) | 2.81x10 <sup>-10</sup> | 1.64x10 <sup>-10</sup> |

<sup>1</sup>SNPs marked in bold and asterisked do not reach  $P < 5 \times 10^{-8}$  for overall, ER-positive or ER-negative breast cancer.

<sup>2</sup>Chromosome.

<sup>3</sup>Build 37 position.

<sup>4</sup>Reference/effect allele, based on the overall frequency in controls in iCOGS (forward strand).

<sup>5</sup>Mean frequency of the effect allele.

<sup>6</sup>Per-allele OR for the effect allele.

<sup>7</sup>1 degree of freedom trend test.

<sup>8</sup>Mean imputation  $r^2$  from IMPUTE2 ( $r^2=1$  for genotyped SNPs).

<sup>9</sup>Combined  $P$ -value based on meta-analysis of the GWAS and iCOGS results.

<sup>10</sup>rs17879961 was not included in the main analysis as MAF  $< 0.005$  in iCOGS.

\* Variants that do not reach  $P < 5 \times 10^{-8}$  in overall, ER-negative or ER-positive disease



**Supplementary Table 3c.** Association results for ER-negative breast cancer.

| SNP <sup>1</sup>  | Chr <sup>2</sup> | Position <sup>3</sup> | Alleles <sup>4</sup> | MAF GWAS <sup>5</sup> | OR GWAS (95%CI) <sup>6</sup> | GWAS P <sup>7</sup>    | MAF iCOGS <sup>5</sup> | r <sup>2</sup> iCOGS <sup>8</sup> | OR iCOGS (95%CI) <sup>6</sup> | iCOGS P <sup>7</sup>         | Combine P <sup>9</sup>       |
|-------------------|------------------|-----------------------|----------------------|-----------------------|------------------------------|------------------------|------------------------|-----------------------------------|-------------------------------|------------------------------|------------------------------|
| rs616488          | 1                | 10566215              | A/G                  | 0.33                  | 0.92(0.87-0.97)              | 0.0033                 | 0.33                   | 1                                 | 0.91(0.87-0.95)               | 3.91E-06                     | 2.99x10 <sup>-08</sup>       |
| rs11552449        | 1                | 114448389             | C/T                  | 0.17                  | 1.09(1.02-1.17)              | 0.0159                 | 0.16                   | 1                                 | 1.04(0.99-1.1)                | 0.0833                       | 0.00689                      |
| rs11249433        | 1                | 121280613             | A/G                  | 0.42                  | 1.06(1-1.13)                 | 0.066                  | 0.4                    | 1                                 | 1(0.96-1.04)                  | 0.938                        | 0.334                        |
| rs6678914         | 1                | 202187176             | G/A                  | 0.41                  | 0.88(0.83-0.93)              | 2.32x10 <sup>-06</sup> | 0.41                   | 1                                 | 0.92(0.88-0.96)               | 1.69E-05                     | 3.83x10 <sup>-10</sup>       |
| rs4245739         | 1                | 204518842             | A/C                  | 0.28                  | 1.12(1.05-1.18)              | 0.000218               | 0.26                   | 1                                 | 1.15(1.11-1.2)                | 1.75E-11                     | 1.23x10 <sup>-14</sup>       |
| rs12710696        | 2                | 19320803              | C/T                  | 0.37                  | 1.07(1.02-1.13)              | 0.00955                | 0.36                   | 1                                 | 1.1(1.06-1.14)                | 1.24E-06                     | 3.95x10 <sup>-08</sup>       |
| rs4849887         | 2                | 121245122             | C/T                  | 0.1                   | 0.96(0.88-1.05)              | 0.345                  | 0.1                    | 1                                 | 0.9(0.85-0.96)                | 0.00223                      | 0.00233                      |
| rs2016394         | 2                | 172972971             | G/A                  | 0.47                  | 1.07(1.01-1.12)              | 0.013                  | 0.48                   | 1                                 | 1(0.96-1.03)                  | 0.817                        | 0.161                        |
| <i>rs1550623*</i> | 2                | <i>174212894</i>      | <i>A/G</i>           | <i>0.16</i>           | <i>0.98(0.91-1.05)</i>       | <i>0.572</i>           | <i>0.16</i>            | <i>1</i>                          | <i>0.95(0.91-1.01)</i>        | <i>0.0784</i>                | <i>0.0651</i>                |
| <i>rs1045485*</i> | 2                | <i>202149589</i>      | <i>G/C</i>           | <i>0.13</i>           | <i>0.9(0.83-0.97)</i>        | <i>0.00887</i>         | <i>0.13</i>            | <i>1</i>                          | <i>0.98(0.92-1.03)</i>        | <i>0.43</i>                  | <i>0.0198</i>                |
| rs13387042        | 2                | 217905832             | A/G                  | 0.48                  | 0.94(0.9-0.99)               | 0.0263                 | 0.49                   | 1                                 | 0.96(0.93-1)                  | 0.0345                       | 0.00158                      |
| rs16857609        | 2                | 218296508             | C/T                  | 0.26                  | 1.06(1-1.13)                 | 0.0466                 | 0.26                   | 1                                 | 1.09(1.04-1.13)               | 0.000101                     | 3.06x10 <sup>-05</sup>       |
| rs6762644         | 3                | 4742276               | A/G                  | 0.39                  | 0.98(0.93-1.04)              | 0.502                  | 0.4                    | 1                                 | 1.02(0.98-1.06)               | 0.276                        | 0.719                        |
| rs4973768         | 3                | 27416013              | C/T                  | 0.48                  | 1.03(0.97-1.08)              | 0.326                  | 0.47                   | 1                                 | 1.05(1.01-1.09)               | 0.00897                      | 0.00662                      |
| rs12493607        | 3                | 30682939              | G/C                  | 0.35                  | 0.99(0.94-1.05)              | 0.823                  | 0.34                   | 1                                 | 1.02(0.98-1.06)               | 0.373                        | 0.527                        |
| rs1053338         | 3                | 63967900              | A/G                  | 0.12                  | 1.02(0.94-1.10)              | 0.63                   | 0.13                   | 1                                 | 1.06(1.00-1.12)               | 0.04                         | 0.05                         |
| rs9790517         | 4                | 106084778             | C/T                  | 0.23                  | 1.1(1.03-1.17)               | 0.00306                | 0.22                   | 1                                 | 1.03(0.98-1.07)               | 0.275                        | 0.00896                      |
| rs6828523         | 4                | 175846426             | C/A                  | 0.12                  | 0.94(0.86-1.02)              | 0.136                  | 0.12                   | 1                                 | 1.02(0.96-1.08)               | 0.484                        | 0.772                        |
| rs10069690        | 5                | 1279790               | C/T                  | 0.29                  | 1.07(0.95-1.21)              | 0.261                  | 0.26                   | 1                                 | 1.16(1.12-1.21)               | 3.97x10 <sup>-13</sup>       | 5.84x10 <sup>-13</sup>       |
| <i>rs7726159*</i> | 5                | <i>1282319</i>        | <i>C/A</i>           | <i>0.35</i>           | <i>1.07(0.98-1.16)</i>       | <i>0.129</i>           | <i>0.34</i>            | <i>1</i>                          | <i>1.09(1.05-1.14)</i>        | <i>9.75x10<sup>-06</sup></i> | <i>2.19x10<sup>-06</sup></i> |
| rs2736108         | 5                | 1297488               | C/T                  | 0.26                  | 0.93(0.84-1.03)              | 0.168                  | 0.29                   | 1                                 | 0.89(0.85-0.93)               | 5.13x10 <sup>-08</sup>       | 1.41x10 <sup>-08</sup>       |
| rs10941679        | 5                | 44706498              | A/G                  | 0.24                  | 1.07(0.98-1.16)              | 0.129                  | 0.25                   | 1                                 | 1.03(0.99-1.08)               | 0.147                        | 0.0352                       |

|             |    |           |     |      |                 |                        |      |   |                 |                        |                        |
|-------------|----|-----------|-----|------|-----------------|------------------------|------|---|-----------------|------------------------|------------------------|
| rs889312    | 5  | 56031884  | A/C | 0.28 | 1.07(1.01-1.14) | 0.0142                 | 0.28 | 1 | 1.06(1.02-1.1)  | 0.00663                | 0.000239               |
| rs10472076  | 5  | 58184061  | T/C | 0.36 | 1.04(0.99-1.1)  | 0.134                  | 0.38 | 1 | 1.06(1.02-1.1)  | 0.00464                | 0.0023                 |
| rs1353747   | 5  | 58337481  | T/G | 0.09 | 0.97(0.89-1.06) | 0.512                  | 0.1  | 1 | 0.92(0.86-0.98) | 0.00835                | 0.0098                 |
| rs1432679   | 5  | 158244083 | T/C | 0.43 | 1.06(1-1.11)    | 0.039                  | 0.43 | 1 | 1.08(1.04-1.13) | 2.39x10 <sup>-05</sup> | 2.83x10 <sup>-06</sup> |
| rs11242675* | 6  | 1318878   | T/C | 0.37 | 0.94(0.89-0.99) | 0.015                  | 0.38 | 1 | 0.96(0.92-0.99) | 0.0217                 | 0.00069                |
| rs204247    | 6  | 13722523  | A/G | 0.44 | 1.08(1.03-1.14) | 0.00307                | 0.44 | 1 | 1.01(0.97-1.04) | 0.739                  | 0.0489                 |
| rs17529111  | 6  | 82128386  | T/C | 0.22 | 1.17(1.08-1.26) | 0.000167               | 0.22 | 1 | 1.05(1-1.09)    | 0.0467                 | 0.000356               |
| rs12662670  | 6  | 151918856 | T/G | 0.08 | 1.25(1.13-1.37) | 7.53x10 <sup>-06</sup> | 0.07 | 1 | 1.24(1.16-1.32) | 3.00x10 <sup>-10</sup> | 8.90x10 <sup>-15</sup> |
| rs2046210   | 6  | 151948366 | G/A | 0.35 | 1.15(1.09-1.22) | 2.26x10 <sup>-07</sup> | 0.34 | 1 | 1.16(1.12-1.21) | 8.88x10 <sup>-14</sup> | 4.10x10 <sup>-20</sup> |
| rs6964587*  | 7  | 91630620  | G/T | 0.39 | 1.01(0.96-1.06) | 0.79                   | 0.39 | 1 | 1.04(1-1.08)    | 0.06                   | 0.09                   |
| rs720475    | 7  | 144074929 | G/A | 0.24 | 1.03(0.96-1.09) | 0.415                  | 0.26 | 1 | 0.99(0.95-1.03) | 0.694                  | 0.968                  |
| rs9693444   | 8  | 29509616  | C/A | 0.32 | 1.02(0.96-1.07) | 0.567                  | 0.32 | 1 | 1.09(1.04-1.13) | 4.66E-05               | 0.000342               |
| rs6472903   | 8  | 76230301  | T/G | 0.18 | 0.97(0.9-1.04)  | 0.325                  | 0.18 | 1 | 0.94(0.89-0.99) | 0.0126                 | 0.00892                |
| rs2943559   | 8  | 76417937  | A/G | 0.07 | 1.16(1.05-1.29) | 0.00384                | 0.07 | 1 | 1.07(1-1.15)    | 0.0552                 | 0.00133                |
| rs13281615  | 8  | 128355618 | A/G | 0.42 | 1.07(1.01-1.12) | 0.0157                 | 0.4  | 1 | 1.03(0.99-1.07) | 0.195                  | 0.0129                 |
| rs11780156  | 8  | 129194641 | C/T | 0.18 | 1.02(0.95-1.09) | 0.586                  | 0.16 | 1 | 1.06(1-1.11)    | 0.032                  | 0.0365                 |
| rs1011970   | 9  | 22062134  | G/T | 0.17 | 1.08(1.01-1.15) | 0.0335                 | 0.17 | 1 | 1.11(1.06-1.17) | 1.42x10 <sup>-05</sup> | 7.36x10 <sup>-07</sup> |
| rs10759243  | 9  | 110306115 | C/A | 0.27 | 1.1(1.02-1.18)  | 0.0168                 | 0.29 | 1 | 1.01(0.97-1.05) | 0.608                  | 0.15                   |
| rs865686    | 9  | 110888478 | T/G | 0.36 | 0.97(0.92-1.03) | 0.332                  | 0.38 | 1 | 0.99(0.95-1.03) | 0.487                  | 0.211                  |
| rs2380205*  | 10 | 5886734   | C/T | 0.44 | 0.98(0.93-1.03) | 0.492                  | 0.44 | 1 | 1.01(0.97-1.05) | 0.718                  | 0.755                  |
| rs7072776   | 10 | 22032942  | G/A | 0.28 | 1.04(0.99-1.11) | 0.136                  | 0.29 | 1 | 0.94(0.91-0.98) | 0.00709                | 0.216                  |
| rs11814448  | 10 | 22315843  | A/C | 0.02 | 1.22(0.92-1.62) | 0.164                  | 0.02 | 1 | 1.2(1.06-1.37)  | 0.00399                | 0.00143                |
| rs10995190  | 10 | 64278682  | G/A | 0.15 | 0.92(0.85-0.98) | 0.0173                 | 0.16 | 1 | 0.87(0.83-0.92) | 3.34x10 <sup>-07</sup> | 3.75x10 <sup>-08</sup> |
| rs704010    | 10 | 80841148  | C/T | 0.38 | 1.07(1.02-1.13) | 0.0114                 | 0.38 | 1 | 1.03(0.99-1.07) | 0.0969                 | 0.00388                |
| rs7904519   | 10 | 114773927 | A/G | 0.46 | 1.12(1.06-1.18) | 3.28x10 <sup>-05</sup> | 0.46 | 1 | 1.04(1.01-1.08) | 0.021                  | 7.54x10 <sup>-06</sup> |

|             |    |           |     |      |                 |                        |      |      |                 |                        |                        |
|-------------|----|-----------|-----|------|-----------------|------------------------|------|------|-----------------|------------------------|------------------------|
| rs11199914  | 10 | 123093901 | C/T | 0.32 | 0.96(0.91-1.02) | 0.156                  | 0.32 | 1    | 1.02(0.98-1.06) | 0.398                  | 0.971                  |
| rs2981579   | 10 | 123337335 | G/A | 0.42 | 1.02(0.97-1.08) | 0.367                  | 0.4  | 1    | 1.02(0.99-1.06) | 0.205                  | 0.0906                 |
| rs3817198   | 11 | 1909006   | T/C | 0.32 | 1.06(1-1.12)    | 0.0406                 | 0.31 | 1    | 1.06(1.02-1.11) | 0.0028                 | 0.000401               |
| rs3903072   | 11 | 65583066  | G/T | 0.47 | 0.94(0.89-0.99) | 0.015                  | 0.47 | 1    | 0.97(0.94-1.01) | 0.173                  | 0.00625                |
| rs78540526  | 11 | 69331418  | C/T | 0.08 | 1.1(0.98-1.24)  | 0.108                  | 0.08 | 0.99 | 1.03(0.96-1.11) | 0.376                  | 0.138                  |
| rs554219    | 11 | 69331642  | C/G | 0.13 | 1.08(1-1.17)    | 0.0483                 | 0.12 | 1    | 1.02(0.96-1.08) | 0.486                  | 0.1                    |
| rs75915166  | 11 | 69379161  | C/A | 0.07 | 1.04(0.91-1.19) | 0.591                  | 0.06 | 1    | 1.06(0.98-1.14) | 0.161                  | 0.196                  |
| rs11820646  | 11 | 129461171 | C/T | 0.4  | 0.93(0.88-0.98) | 0.0092                 | 0.41 | 1    | 0.96(0.92-1)    | 0.0295                 | 0.000967               |
| rs12422552* | 12 | 14413931  | G/C | 0.26 | 1.08(1.01-1.14) | 0.0161                 | 0.26 | 1    | 1.05(1-1.09)    | 0.0338                 | 0.0023                 |
| rs10771399  | 12 | 28155080  | A/G | 0.1  | 0.8(0.72-0.87)  | 1.46x10 <sup>-06</sup> | 0.12 | 1    | 0.84(0.79-0.9)  | 5.05x10 <sup>-08</sup> | 1.64x10 <sup>-13</sup> |
| rs17356907  | 12 | 96027759  | A/G | 0.3  | 0.89(0.84-0.94) | 8.10x10 <sup>-05</sup> | 0.3  | 1    | 0.95(0.91-0.99) | 0.0101                 | 6.25x10 <sup>-06</sup> |
| rs1292011   | 12 | 115836522 | A/G | 0.42 | 0.98(0.93-1.03) | 0.493                  | 0.42 | 1    | 0.98(0.95-1.02) | 0.416                  | 0.286                  |
| rs11571833* | 13 | 32972626  | A/T | 0.01 | 1.35(0.86-2.11) | 0.19                   | 0.01 | 1    | 1.48(1.24-1.77) | 1.57x10 <sup>-05</sup> | 1.01x10 <sup>-05</sup> |
| rs2236007   | 14 | 37132769  | G/A | 0.21 | 1(0.94-1.07)    | 0.938                  | 0.21 | 1    | 0.96(0.92-1)    | 0.0777                 | 0.118                  |
| rs2588809   | 14 | 68660428  | C/T | 0.15 | 0.93(0.86-1.01) | 0.0727                 | 0.16 | 1    | 1.01(0.96-1.07) | 0.609                  | 0.532                  |
| rs999737    | 14 | 69034682  | C/T | 0.23 | 0.92(0.86-0.98) | 0.00631                | 0.23 | 1    | 0.94(0.9-0.98)  | 0.00728                | 0.00019                |
| rs941764    | 14 | 91841069  | A/G | 0.32 | 0.96(0.89-1.03) | 0.228                  | 0.34 | 1    | 1.04(1-1.08)    | 0.0448                 | 0.316                  |
| rs3803662   | 16 | 52586341  | G/A | 0.29 | 1.12(1.06-1.18) | 0.000139               | 0.26 | 1    | 1.15(1.1-1.19)  | 6.51x10 <sup>-11</sup> | 5.11x10 <sup>-14</sup> |
| rs17817449  | 16 | 53813367  | T/G | 0.4  | 0.96(0.91-1.02) | 0.167                  | 0.4  | 1    | 0.91(0.87-0.94) | 3.43x10 <sup>-07</sup> | 5.59x10 <sup>-07</sup> |
| rs11075995  | 16 | 53855291  | T/A | 0.23 | 1.12(1.05-1.19) | 0.000517               | 0.24 | 1    | 1.1(1.05-1.15)  | 1.14x10 <sup>-05</sup> | 3.30x10 <sup>-08</sup> |
| rs13329835  | 16 | 80650805  | A/G | 0.23 | 1.04(0.98-1.1)  | 0.242                  | 0.22 | 1    | 1.02(0.98-1.07) | 0.4                    | 0.161                  |
| rs6504950   | 17 | 53056471  | G/A | 0.28 | 0.96(0.91-1.02) | 0.206                  | 0.28 | 1    | 0.98(0.94-1.02) | 0.239                  | 0.0824                 |
| rs527616    | 18 | 24337424  | G/C | 0.38 | 0.94(0.88-1.01) | 0.0723                 | 0.38 | 1    | 0.98(0.94-1.02) | 0.331                  | 0.064                  |
| rs1436904   | 18 | 24570667  | T/G | 0.4  | 0.98(0.93-1.03) | 0.368                  | 0.4  | 1    | 1(0.97-1.04)    | 0.816                  | 0.689                  |
| rs8170      | 19 | 17389704  | G/A | 0.19 | 1.17(1.09-1.25) | 7.74E-06               | 0.19 | 1    | 1.14(1.09-1.2)  | 1.94x10 <sup>-08</sup> | 9.09x10 <sup>-13</sup> |

|                          |    |          |     |      |                 |          |        |   |                 |                        |                        |
|--------------------------|----|----------|-----|------|-----------------|----------|--------|---|-----------------|------------------------|------------------------|
| rs2363956                | 19 | 17394124 | G/T | 0.49 | 1.13(1.07-1.19) | 4.53E-06 | 0.49   | 1 | 1.13(1.09-1.17) | 1.79x10 <sup>-10</sup> | 3.04x10 <sup>-15</sup> |
| rs4808801                | 19 | 18571141 | A/G | 0.34 | 0.99(0.94-1.05) | 0.686    | 0.35   | 1 | 0.92(0.88-0.96) | 2.76x10 <sup>-05</sup> | 0.000241               |
| rs3760982                | 19 | 44286513 | G/A | 0.47 | 1.03(0.98-1.09) | 0.247    | 0.46   | 1 | 1.04(1-1.08)    | 0.0384                 | 0.023                  |
| rs2823093                | 21 | 16520832 | G/A | 0.26 | 1.02(0.96-1.08) | 0.59     | 0.27   | 1 | 0.97(0.93-1.01) | 0.13                   | 0.417                  |
| rs17879961 <sup>10</sup> | 22 | 29121087 | A/G | 0.03 | 1.07(0.72-1.59) | 0.748    | 0.0049 | 1 | 1.01(0.78-1.31) | 0.927                  | 0.8                    |
| rs132390                 | 22 | 29621477 | T/C | 0.03 | 0.93(0.74-1.18) | 0.562    | 0.04   | 1 | 1.1(1-1.21)     | 0.0511                 | 0.156                  |
| rs6001930                | 22 | 40876234 | T/C | 0.11 | 1.17(1.08-1.28) | 0.000313 | 0.11   | 1 | 1.1(1.04-1.17)  | 0.000866               | 3.91x10 <sup>-06</sup> |

<sup>1</sup>SNPs marked in bold and asterisked do not reach  $P < 5 \times 10^{-8}$  for overall, ER-positive or ER-negative breast cancer.

<sup>2</sup>Chromosome.

<sup>3</sup>Build 37 position.

<sup>4</sup>Reference/effect allele, based on the overall frequency in controls in iCOGS (forward strand).

<sup>5</sup>Mean frequency of the effect allele.

<sup>6</sup>Per-allele OR for the effect allele.

<sup>7</sup>1 degree of freedom trend test.

<sup>8</sup>Mean imputation  $r^2$  from IMPUTE2 ( $r^2=1$  for genotyped SNPs).

<sup>9</sup>Combined  $P$ -value based on meta-analysis of the GWAS and iCOGS results.

<sup>10</sup>rs17879961 was not included in the main analysis as MAF  $< 0.005$  in iCOGS.

\* Variants that do not reach  $P < 5 \times 10^{-8}$  in overall, ER-negative or ER-positive disease

**Supplementary Table 4.** Loci associated with breast cancer at  $P < 5 \times 10^{-8}$  that failed to reach  $P < 5 \times 10^{-8}$  after reanalysis in which imputation was performed without pre-phasing (see Online Methods).

| variant                  | Chromosome | Position <sup>1</sup> | Alleles <sup>2</sup> | MAF <sup>3</sup> | Imputation $r^2$<br>iCOGS | Original p-value      | Re-imputation<br>$r^2$ iCOGS | p-value after<br>re-imputation |
|--------------------------|------------|-----------------------|----------------------|------------------|---------------------------|-----------------------|------------------------------|--------------------------------|
| rs754536                 | 2          | 25176200              | T/C                  | 0.48             | 0.68                      | $4.23 \times 10^{-9}$ | 0.60                         | $2.87 \times 10^{-7}$          |
| rs188193695 <sup>4</sup> | 8          | 11174465              | C/T                  | 0.01             | 0.51                      | $2.65 \times 10^{-8}$ | 0.23                         | 0.15                           |
| rs2229510                | 19         | 12903059              | C/A                  | 0.03             | 0.73                      | $7.11 \times 10^{-9}$ | 0.56                         | $1.15 \times 10^{-7}$          |

<sup>1</sup> build 37 position

<sup>2</sup> Reference/effect allele, based on the overall frequency in controls in iCOGS (forward strand).

<sup>3</sup> Mean frequency of the effect allele.

<sup>4</sup> this variant after re-imputation failed the imputation threshold for inclusion in the meta-analysis

**Supplementary Table 5.** Validation of 15 risk loci by direct genotyping in ~4,000 individuals from SEARCH.

| Best variant                  | Chromosome | Position <sup>1</sup> | Highly correlated SNP genotyped on iCOGS | Reasons for selection on iCOGS                                          | Imputation <sup>2</sup> r <sup>2</sup> iCOGS | Correlation <sup>3</sup> | Estimate <sup>4</sup> imputed | Estimate <sup>5</sup> genotyped |
|-------------------------------|------------|-----------------------|------------------------------------------|-------------------------------------------------------------------------|----------------------------------------------|--------------------------|-------------------------------|---------------------------------|
| rs12405132                    | 1          | 145644984             | -                                        |                                                                         | 0.96                                         | 0.99                     | -0.029                        | -0.026                          |
| rs12048493                    | 1          | 149927034             | rs11205227                               | Published GWAS hit for height <sup>9</sup>                              | -                                            | -                        | -                             | -                               |
| rs72755295                    | 1          | 242034263             | rs4149909                                | Breast cancer combined GWAS, menopause association, candidate from OCAC | -                                            | -                        | -                             | -                               |
| rs6796502                     | 3          | 46866866              | -                                        |                                                                         | 0.91                                         | 0.95                     | -0.062                        | -0.068                          |
| rs13162653 <sup>6</sup>       | 5          | 16187528              | -                                        |                                                                         | 0.72                                         | 0.7                      | -0.066                        | -0.057                          |
| rs2012709                     | 5          | 32567732              | -                                        |                                                                         | 0.81                                         | 0.84                     | 0.109                         | 0.114                           |
| rs7707921                     | 5          | 81538046              | -                                        |                                                                         | 0.88                                         | 0.94                     | -0.135                        | -0.135                          |
| rs9257408 <sup>7</sup>        | 6          | 28926220              | -                                        |                                                                         | 0.92                                         | -                        | -                             | -                               |
| rs4593472                     | 7          | 130667121             | rs4593472                                | Breast cancer combined GWAS                                             | -                                            | -                        | -                             | -                               |
| rs13365225                    | 8          | 36858483              | -                                        |                                                                         | 0.94                                         | 0.99                     | -0.064                        | -0.076                          |
| rs13267382                    | 8          | 117209548             | -                                        |                                                                         | 0.97                                         | 0.96                     | 0.140                         | 0.141                           |
| rs11627032 <sup>8</sup>       | 14         | 93104072              | -                                        |                                                                         | 0.73                                         | 0.78                     | -0.055                        | -0.040                          |
| chr17:29230520:D <sup>9</sup> | 17         | 29230520              | -                                        |                                                                         | 0.76                                         | -                        | -                             | -                               |
| rs745570                      | 17         | 77781725              | -                                        |                                                                         | 0.93                                         | 0.92                     | -0.068                        | -0.073                          |
| rs6507583                     | 18         | 42399590              | -                                        |                                                                         | 0.96                                         | 0.98                     | -0.057                        | -0.056                          |

<sup>1</sup> build 37 position

<sup>2</sup> Mean info score from IMPUTE2

<sup>3</sup> Correlation squared between the imputed and genotyped genotypes for 4123 samples in SEARCH

<sup>4</sup> Beta coefficient in the subset of SEARCH samples from the imputed data

<sup>5</sup> Beta coefficient in the subset of SEARCH samples from the genotyped data

<sup>6</sup> SNP rs186951, correlated with rs13162653, had better imputation quality and also reached  $P < 5 \times 10^{-8}$  ( $r^2 = 0.91$ ,  $P = 2.1 \times 10^{-8}$ ).

<sup>7</sup> genotyped rs28912458 as an alternative (correlation between genotyped and imputed is 0.997, p combined in meta-analysis 6.263e-08)

<sup>8</sup> SNP rs11621587, correlated with rs11627032, had better imputation quality and also reached  $P < 5 \times 10^{-8}$  ( $r^2 = 0.94$ ,  $P = 2.8 \times 10^{-8}$ ).

<sup>9</sup> Alternative SNP failed genotyping. SNP rs62070644, correlated with chr17:29230520:D, had better imputation quality and also reached  $P < 5 \times 10^{-8}$  ( $r^2 = 0.98$ ,  $P = 4.5 \times 10^{-8}$ ).

**Supplementary Table 6:** Genotype-specific OR estimates for 15 novel risk loci, and analysis of heterogeneity in the per-allele ORs among studies, based on iCOGS data.

| Top variant | Chr <sup>1</sup> | Position <sup>2</sup> | Alleles <sup>3</sup> | Heterozygote OR<br>(95% CI) | Homozygote OR<br>(95% CI) | P value (2df)          | P for departure<br>from log additivity | Het P (Q) | I <sup>2</sup> |
|-------------|------------------|-----------------------|----------------------|-----------------------------|---------------------------|------------------------|----------------------------------------|-----------|----------------|
| rs12405132  | 1                | 145644984             | C/T                  | 0.96<br>(0.93-0.99)         | 0.89<br>(0.85-0.93)       | 1.10x10 <sup>-06</sup> | 0.399                                  | 0.49      | 0              |
| rs12048493  | 1                | 149927034             | A/C                  | 1.06<br>(1.03-1.10)         | 1.16<br>(1.10-1.23)       | 1.03x10 <sup>-08</sup> | 0.517                                  | 0.15      | 18.87          |
| rs72755295  | 1                | 242034263             | A/G                  | 1.15<br>(1.08-1.21)         | 1.62<br>(1.05-2.50)       | 1.08x10 <sup>-06</sup> | 0.358                                  | 0.38      | 4.90           |
| rs6796502   | 3                | 46866866              | G/A                  | 0.93<br>(0.9-0.97)          | 0.73<br>(0.62-0.85)       | 7.50x10 <sup>-07</sup> | 0.049                                  | 0.46      | 0.38           |
| rs13162653  | 5                | 16187528              | G/T                  | 0.97<br>(0.93-1.01)         | 0.89<br>(0.85-0.93)       | 5.69x10 <sup>-06</sup> | 0.263                                  | 0.64      | 0              |
| rs2012709   | 5                | 32567732              | C/T                  | 1.05<br>(1.01-1.09)         | 1.11<br>(1.06-1.16)       | 1.03x10 <sup>-05</sup> | 0.916                                  | 0.12      | 21.03          |
| rs7707921   | 5                | 81538046              | A/T                  | 0.92<br>(0.86-0.99)         | 0.86<br>(0.81-0.92)       | 2.99x10 <sup>-08</sup> | 0.803                                  | 0.52      | 0              |
| rs9257408   | 6                | 28926220              | G/C                  | 1.05<br>(1.02-1.09)         | 1.11<br>(1.06-1.16)       | 2.93x10 <sup>-06</sup> | 0.898                                  | 0.04      | 30.15          |
| rs4593472   | 7                | 130667121             | C/T                  | 0.95<br>(0.92-0.97)         | 0.92<br>(0.88-0.96)       | 1.71x10 <sup>-05</sup> | 0.413                                  | 0.01      | 39.47          |
| rs13365225  | 8                | 36858483              | A/G                  | 0.94<br>(0.92-0.97)         | 0.93<br>(0.85-1.01)       | 0.000588               | 0.431                                  | 0.08      | 24.85          |
| rs13267382  | 8                | 117209548             | G/A                  | 1.06<br>(1.02-1.11)         | 1.11<br>(1.06-1.16)       | 2.24x10 <sup>-05</sup> | 0.471                                  | 0.95      | 0              |



|                  |    |          |       |                     |                     |                        |       |      |       |
|------------------|----|----------|-------|---------------------|---------------------|------------------------|-------|------|-------|
| rs11627032       | 14 | 93104072 | T/C   | 0.96<br>(0.92-0.99) | 0.85<br>(0.8-0.91)  | 2.65x10 <sup>-06</sup> | 0.173 | 0.87 | 0     |
| chr17:29230520:D | 17 | 29230520 | GGT/G | 0.93<br>(0.90-0.96) | 0.89<br>(0.82-0.97) | 5.55x10 <sup>-06</sup> | 0.489 | 0.13 | 20.26 |
| rs745570         | 17 | 77781725 | A/G   | 0.96<br>(0.93-0.99) | 0.9<br>(0.87-0.94)  | 2.46x10 <sup>-06</sup> | 0.547 | 0.59 | 0     |
| rs6507583        | 18 | 42399590 | A/G   | 0.91<br>(0.87-0.95) | 0.85<br>(0.69-1.04) | 7.39x10 <sup>-06</sup> | 0.805 | 0.94 | 0     |

<sup>1</sup> Chromosome

<sup>2</sup> Build 37 position

<sup>3</sup> Reference/effect allele (forward strand).

<sup>4</sup> OR for heterozygotes relative to reference allele homozygotes

<sup>5</sup> OR for homozygotes relative to effect allele homozygotes

<sup>6</sup> P-value for heterogeneity in the per-allele ORs among the iCOGS studies (Q-statistic)

<sup>7</sup> I<sup>2</sup> statistic for heterogeneity in the per-allele ORs among the iCOGS studies

**Supplementary Table 7:** Per allele ORs for DCIS vs invasive disease (based on 2470 dcis and 44,791 invasive cases in the iCOGS dataset).

| Top variant | Chr <sup>1</sup> | Position <sup>2</sup> | Alleles <sup>3</sup> | OR invasive<br>(95% CI) | P invasive             | OR dcis<br>(95% CI) | P dcis | P invasive vs dcis |
|-------------|------------------|-----------------------|----------------------|-------------------------|------------------------|---------------------|--------|--------------------|
| rs12405132  | 1                | 145644984             | C/T                  | 0.95<br>(0.93-0.97)     | 1.22x10 <sup>-07</sup> | 0.97<br>(0.91-1.03) | 0.313  | 0.796              |
| rs12048493  | 1                | 149927034             | A/C                  | 1.07<br>(1.05-1.10)     | 2.64x10 <sup>-09</sup> | 1.06<br>(0.99-1.14) | 0.103  | 0.89               |
| rs72755295  | 1                | 242034263             | A/G                  | 1.16<br>(1.1-1.23)      | 1.08x10 <sup>-07</sup> | 1.02<br>(0.86-1.21) | 0.856  | 0.416              |
| rs6796502   | 3                | 46866866              | G/A                  | 0.91<br>(0.88-0.95)     | 5.42x10 <sup>-07</sup> | 0.91<br>(0.82-1.02) | 0.107  | 0.674              |
| rs13162653  | 5                | 16187528              | G/T                  | 0.95<br>(0.93-0.97)     | 3.18x10 <sup>-06</sup> | 0.95<br>(0.89-1.02) | 0.183  | 0.938              |
| rs2012709   | 5                | 32567732              | C/T                  | 1.05<br>(1.03-1.08)     | 1.98x10 <sup>-06</sup> | 1.04<br>(0.97-1.11) | 0.267  | 0.741              |
| rs7707921   | 5                | 81538046              | A/T                  | 0.93<br>(0.91-0.95)     | 1.28x10 <sup>-08</sup> | 0.93<br>(0.86-1)    | 0.054  | 0.645              |
| rs9257408   | 6                | 28926220              | G/C                  | 1.06<br>(1.03-1.08)     | 2.30x10 <sup>-07</sup> | 1.07<br>(1-1.14)    | 0.038  | 0.706              |
| rs4593472   | 7                | 130667121             | C/T                  | 0.95<br>(0.93-0.97)     | 2.67x10 <sup>-06</sup> | 0.97<br>(0.91-1.03) | 0.316  | 0.546              |
| rs13365225  | 8                | 36858483              | A/G                  | 0.95<br>(0.93-0.98)     | 0.000356               | 0.92<br>(0.85-1)    | 0.054  | 0.502              |
| rs13267382  | 8                | 117209548             | G/A                  | 1.05<br>(1.03-1.07)     | 1.21x10 <sup>-05</sup> | 1.03<br>(0.96-1.09) | 0.416  | 0.456              |
| rs11627032  | 14               | 93104072              | T/C                  | 0.94                    | 2.91x10 <sup>-06</sup> | 0.9                 | 0.007  | 0.183              |

|                  |    |          |       |                     |                        |                     |      |       |
|------------------|----|----------|-------|---------------------|------------------------|---------------------|------|-------|
|                  |    |          |       | (0.92-0.96)         |                        | (0.83-0.97)         |      |       |
| chr17:29230520:D | 17 | 29230520 | GGT/G | 0.93<br>(0.91-0.96) | 6.36x10 <sup>-07</sup> | 0.96<br>(0.88-1.04) | 0.32 | 0.21  |
| rs745570         | 17 | 77781725 | A/G   | 0.95<br>(0.93-0.97) | 1.34x10 <sup>-07</sup> | 0.99<br>(0.93-1.06) | 0.8  | 0.141 |
| rs6507583        | 18 | 42399590 | A/G   | 0.91<br>(0.88-0.95) | 2.43x10 <sup>-06</sup> | 0.91<br>(0.81-1.03) | 0.13 | 0.939 |

<sup>1</sup> Chromosome

<sup>2</sup> Build 37 position

<sup>3</sup> Reference/effect allele (forward strand)

**Supplementary Table 8:** Per-allele ORs for ER- vs. ER+ disease (based on 7333 ER- cases and 27,078 ER+ cases in the iCOGS dataset).

| Top variant | Chr <sup>1</sup> | Position <sup>2</sup> | Alleles <sup>3</sup> | OR ER+<br>(95% CI)  | P ER+                  | OR ER-<br>(95% CI)  | P ER-  | P ER+/ER- |
|-------------|------------------|-----------------------|----------------------|---------------------|------------------------|---------------------|--------|-----------|
| rs12405132  | 1                | 145644984             | C/T                  | 0.93<br>(0.91-0.96) | 1.25x10 <sup>-08</sup> | 0.98<br>(0.94-1.02) | 0.3386 | 0.019     |
| rs12048493  | 1                | 149927034             | A/C                  | 1.09<br>(1.06-1.12) | 3.37x10 <sup>-10</sup> | 1.02<br>(0.98-1.06) | 0.292  | 0.010     |
| rs72755295  | 1                | 242034263             | A/G                  | 1.16<br>(1.09-1.24) | 4.04x10 <sup>-06</sup> | 1.21<br>(1.09-1.34) | 0.0004 | 0.599     |
| rs6796502   | 3                | 46866866              | G/A                  | 0.9<br>(0.87-0.94)  | 1.25x10 <sup>-06</sup> | 0.94<br>(0.88-1.01) | 0.0950 | 0.070     |
| rs13162653  | 5                | 16187528              | G/T                  | 0.94<br>(0.92-0.97) | 1.75x10 <sup>-05</sup> | 0.96<br>(0.92-1)    | 0.0517 | 0.388     |
| rs2012709   | 5                | 32567732              | C/T                  | 1.05<br>(1.03-1.08) | 7.27x10 <sup>-05</sup> | 1.04<br>(1-1.08)    | 0.0784 | 0.684     |
| rs7707921   | 5                | 81538046              | A/T                  | 0.92<br>(0.89-0.95) | 5.00x10 <sup>-09</sup> | 0.97<br>(0.92-1.01) | 0.1380 | 0.062     |
| rs9257408   | 6                | 28926220              | G/C                  | 1.05<br>(1.03-1.08) | 5.07x10 <sup>-05</sup> | 1.05<br>(1.01-1.1)  | 0.0095 | 0.867     |
| rs4593472   | 7                | 130667121             | C/T                  | 0.94<br>(0.92-0.96) | 3.57x10 <sup>-07</sup> | 0.99<br>(0.95-1.03) | 0.6806 | 0.046     |
| rs13365225  | 8                | 36858483              | A/G                  | 0.95<br>(0.92-0.98) | 0.00062                | 0.93<br>(0.88-0.98) | 0.0034 | 0.608     |
| rs13267382  | 8                | 117209548             | G/A                  | 1.05<br>(1.02-1.07) | 9.57x10 <sup>-05</sup> | 1.06<br>(1.02-1.1)  | 0.0043 | 0.851     |

|                  |    |          |       |                     |                        |                     |        |       |
|------------------|----|----------|-------|---------------------|------------------------|---------------------|--------|-------|
| rs11627032       | 14 | 93104072 | T/C   | 0.95<br>(0.92-0.98) | 0.00077                | 0.92<br>(0.87-0.96) | 0.0007 | 0.426 |
| chr17:29230520:D | 17 | 29230520 | GGT/G | 0.92<br>(0.89-0.95) | $1.43 \times 10^{-06}$ | 0.93<br>(0.88-0.98) | 0.008  | 0.781 |
| rs745570         | 17 | 77781725 | A/G   | 0.94<br>(0.92-0.96) | $4.02 \times 10^{-07}$ | 0.95<br>(0.91-0.99) | 0.0097 | 0.691 |
| rs6507583        | 18 | 42399590 | A/G   | 0.9<br>(0.86-0.94)  | $7.60 \times 10^{-06}$ | 0.97<br>(0.9-1.05)  | 0.4315 | 0.036 |

<sup>1</sup> Chromosome

<sup>2</sup> Build 37 position

<sup>3</sup> Reference/effect allele (forward strand)

**Supplementary Table 9:** Per-allele ORs by age at diagnosis ( age categories <40: 3987,40-50 : 9714, 50-60 :13,313 , >=60 : 15,176).

| Top variant | Chr <sup>1</sup> | Position <sup>2</sup> | Alleles <sup>3</sup> | Per-allele OR (95% CI) by age at diagnosis |                     |                     |                     | P-value for trend |
|-------------|------------------|-----------------------|----------------------|--------------------------------------------|---------------------|---------------------|---------------------|-------------------|
|             |                  |                       |                      | <40                                        | 40-49               | 50-59               | 60+                 |                   |
| rs12405132  | 1                | 145644984             | C/T                  | 0.96<br>(0.91-1.01)                        | 0.94<br>(0.9-0.97)  | 0.96<br>(0.93-0.99) | 0.94<br>(0.92-0.97) | 0.998             |
| rs12048493  | 1                | 149927034             | A/C                  | 1.07<br>(1-1.13)                           | 1.11<br>(1.07-1.15) | 1.06<br>(1.02-1.09) | 1.07<br>(1.04-1.10) | 0.133             |
| rs72755295  | 1                | 242034263             | A/G                  | 1.21<br>(1.05-1.39)                        | 1.19<br>(1.09-1.31) | 1.13<br>(1.05-1.22) | 1.16<br>(1.08-1.25) | 0.852             |
| rs6796502   | 3                | 46866866              | G/A                  | 0.91<br>(0.84-1)                           | 0.88<br>(0.83-0.94) | 0.91<br>(0.87-0.96) | 0.93<br>(0.89-0.98) | 0.522             |
| rs13162653  | 5                | 16187528              | G/T                  | 0.89<br>(0.84-0.95)                        | 0.93<br>(0.9-0.97)  | 0.94<br>(0.91-0.97) | 0.96<br>(0.93-0.99) | 0.007             |
| rs2012709   | 5                | 32567732              | C/T                  | 1.04<br>(0.98-1.1)                         | 1.05<br>(1.01-1.09) | 1.05<br>(1.02-1.08) | 1.05<br>(1.02-1.08) | 0.528             |
| rs7707921   | 5                | 81538046              | A/T                  | 0.96<br>(0.9-1.02)                         | 0.9<br>(0.86-0.94)  | 0.95<br>(0.91-0.98) | 0.92<br>(0.89-0.95) | 0.999             |
| rs9257408   | 6                | 28926220              | G/C                  | 1.01<br>(0.96-1.07)                        | 1.06<br>(1.02-1.09) | 1.04<br>(1.01-1.07) | 1.07<br>(1.04-1.1)  | 0.774             |
| rs4593472   | 7                | 130667121             | C/T                  | 0.97<br>(0.92-1.02)                        | 0.95<br>(0.92-0.99) | 0.94<br>(0.92-0.97) | 0.96<br>(0.93-0.98) | 0.867             |
| rs13365225  | 8                | 36858483              | A/G                  | 0.9<br>(0.84-0.96)                         | 0.96<br>(0.91-1)    | 0.93<br>(0.9-0.97)  | 0.97<br>(0.94-1.01) | 0.492             |
| rs13267382  | 8                | 117209548             | G/A                  | 1.06<br>(1.01-1.12)                        | 1.08<br>(1.05-1.12) | 1.05<br>(1.02-1.08) | 1.04<br>(1.01-1.07) | 0.332             |
| rs11627032  | 14               | 93104072              | T/C                  | 0.93                                       | 0.93                | 0.95                | 0.94                | 0.464             |

|                  |    |          |       | (0.87-0.99)         | (0.89-0.97)         | (0.92-0.99)         | (0.91-0.97)         |       |
|------------------|----|----------|-------|---------------------|---------------------|---------------------|---------------------|-------|
| chr17:29230520:D | 17 | 29230520 | GGT/G | 0.89<br>(0.83-0.96) | 0.92<br>(0.88-0.97) | 0.95<br>(0.91-0.99) | 0.92<br>(0.89-0.96) | 0.52  |
| rs745570         | 17 | 77781725 | A/G   | 0.95<br>(0.91-1)    | 0.95<br>(0.92-0.98) | 0.95<br>(0.92-0.98) | 0.96<br>(0.93-0.99) | 0.704 |
| rs6507583        | 18 | 42399590 | A/G   | 1.02<br>(0.92-1.12) | 0.92<br>(0.86-0.98) | 0.91<br>(0.86-0.96) | 0.88<br>(0.84-0.93) | 0.006 |

<sup>1</sup> Chromosome

<sup>2</sup> Build 37 position

<sup>3</sup> Reference/effect allele (forward strand)

## Supplementary Note

### Acknowledgments

**BCAC** is funded by Cancer Research UK [C1287/A10118, C1287/A12014] and by the European Community's Seventh Framework Programme under grant agreement n° 223175 (HEALTH-F2-2009-223175) (COGS). Meetings of the BCAC have been funded by the European Union COST programme [BM0606]. M.G. was supported by the Lebanese National Council for Scientific Research. Genotyping of the iCOGS array was funded by the European Union (HEALTH-F2-2009-223175), Cancer Research UK (C1287/A10710), the Canadian Institutes of Health Research for the "CIHR Team in Familial Risks of Breast Cancer" program (J.Simard and D.F.E.), and the Ministry of Economic Development, Innovation and Export Trade of Quebec – grant # PSR-SIIRI-701 (J.Simard,D.E and P.Hall). This work was supported by the Government of Canada through Genome Canada and the Canadian Institutes of Health Research, and the Ministère de l'Économie, Innovation et Exportation du Québec through Genome Québec. Combining the GWAS data was supported in part by The National Institute of Health (NIH) Cancer Post-Cancer GWAS initiative grant: No. 1 U19 CA 148065-01 (DRIVE, part of the GAME-ON initiative). This study would not have been possible without the contributions of the following: Andrew Berchuck (OCAC), Rosalind A. Eeles, Ali Amin Al Olama, Zsofia Kote-Jarai, Sara Benlloch (PRACTICAL), Antonis Antoniou, Lesley McGuffogand Ken Offit (CIMBA), Andrew Lee, and Ed Dicksand the staff of the Centre for Genetic Epidemiology Laboratory, the staff of the CNIO genotyping unit Sylvie LaBoissière and Frederic Robidoux and the staff of the McGill University and Génome Québec Innovation Centre, the staff of the Copenhagen DNA laboratory, and Julie M. Cunningham, Sharon A. Windebank, Christopher A. Hilker, Jeffrey Meyer and the staff of Mayo Clinic Genotyping Core Facility.

The **UK2** GWAS was funded by Wellcome Trust and Cancer Research UK. It included samples collected through the FBCS study which is funded by Cancer Research UK [C8620/A8372]. The WTCCC was funded by the Wellcome Trust. The **EBCG-GWAS** was supported by National Institute of Health Grants U01CA122171, RC1CA145506, R01CA094069, and U19CA148065. The Breast Cancer Family Registry (**BCFR**) is supported by the National Cancer Institute, National Institutes of Health under RFA-CA-06-503 and through cooperative agreements with members of the BCFR and Principal Investigators, including Cancer Care Ontario (U01 CA69467), Cancer Prevention Institute of California (CPIC) (U01 CA69417), and University of Melbourne (U01 CA69638). Samples from the CPIC were processed and distributed by the Coriell Institute for Medical Research. The Northern California site of the Breast Cancer Family Registry [**BCFR (NCA)**] was supported by grant UM1 CA164920 from the National Cancer Institute (USA). The content of this article does not necessarily reflect the views or policies of the National Cancer Institute or any of the collaborating centers in the BCFR, nor does mention of trade names, commercial products, or organizations imply endorsement by the U.S. Government or the BCFR. The **BPC3** was supported by the US National Institutes of Health, National Cancer Institute under cooperative agreements U01-CA98233 (NHS, NHSII, WHS), U01-CA98710 (CPS2), U01-CA98216 (EPIC), U01-CA98758 (MEC) and Intramural Research Program of NIH/National Cancer Institute, Division of Cancer Epidemiology and Genetics (PLCO). Imputation and association analyses for the BPC3 were run on the Odyssey cluster supported by the FAS Division of Science, Research Computing Group at Harvard University. The authors thank Drs Christine Berg and Philip Prorok, Division of Cancer Prevention, NCI, the screening center investigators and staff of the PLCO Cancer Screening Trial, Mr Thomas Riley and staff at Information Management Services, Inc., and Ms



Barbara O'Brien and staff at Westat, Inc. for their contributions to the PLCO Cancer Screening Trial. We would like to thank the participants and staff of the NHS and NHSII for their valuable contributions as well as the following state cancer registries for their help: AL, AZ, AR, CA, CO, CT, DE, FL, GA, ID, IL, IN, IA, KY, LA, ME, MD, MA, MI, NE, NH, NJ, NY, NC, ND, OH, OK, OR, PA, RI, SC, TN, TX, VA, WA, WY. The authors assume full responsibility for analyses and interpretation of these data. The Australian Breast Cancer Family Study (**ABCFS**) was supported by grant UM1 CA164920 from the National Cancer Institute (USA). The ABCFS was also supported by the National Health and Medical Research Council of Australia, the New South Wales Cancer Council, the Victorian Health Promotion Foundation (Australia) and the Victorian Breast Cancer Research Consortium. J.L.H. is a National Health and Medical Research Council (NHMRC) Australia Fellow and a Victorian Breast Cancer Research Consortium Group Leader. M.C.S. is a NHMRC Senior Research Fellow and a Victorian Breast Cancer Research Consortium Group Leader. We thank Maggie Angelakos, Judi Maskiell and Gillian Dite. The **ABCS** was supported by the Dutch Cancer Society [grants NKI 2007-3839; 2009 4363]; BBMRI-NL, which is a Research Infrastructure financed by the Dutch government (NWO 184.021.007); and the Dutch National Genomics Initiative. We thank Sten Cornelissen, Richard van Hien, Linde Braaf, Frans Hogervorst, Senno Verhoef, Laura van 't Veer, Emiel Rutgers, C Ellen van der Schoot and Femke Atsma. The **ACP** study is funded by the Breast Cancer Research Trust, UK. The **ACP** study wishes to thank the participants in the Thai Breast Cancer study. Special Thanks also go to the Thai Ministry of Public Health (MOPH), doctors and nurses who helped with the data collection process. The study would like to thank Dr Prat Boonyawongviroj, the former Permanent Secretary of MOPH and Dr Pornthep Siriwanarungsan, the Department of Health Director-General who have supported the study throughout. The work of the **BBCC** was partly funded by ELAN-Fond of the University Hospital of Erlangen. The **BBCS** is funded by Cancer Research UK and Breakthrough Breast Cancer and acknowledges NHS funding to the NIHR Biomedical Research Centre, and the National Cancer Research Network (NCRN). The BBCS GWAS received funding from The Institut National de Cancer. We thank Eileen Williams, Elaine Ryder-Mills and Kara Sargus. **BIGGS. ES** is supported by NIHR Comprehensive Biomedical Research Centre, Guy's & St. Thomas' NHS Foundation Trust in partnership with King's College London, United Kingdom. IT is supported by the Oxford Biomedical Research Centre. We thank Niall McInerney, Gabrielle Colleran, Andrew Rowan and Angela Jones. The **BSUCH** study was supported by the Dietmar-Hopp Foundation, the Helmholtz Society and the German Cancer Research Center (DKFZ). We thank Peter Bugert and the Medical Faculty Mannheim. The **CECILE** study was funded by Fondation de France, Institut National du Cancer (INCa), Ligue Nationale contre le Cancer, Ligue contre le Cancer Grand Ouest, Agence Nationale de Sécurité Sanitaire (ANSES) and Agence Nationale de la Recherche (ANR). The CECILE study would like to thank Pierre Kerbrat (Centre Eugène Marquis, Rennes) and Patrick Arveux (Centre Georges-François Leclerc, Dijon). **CGEMS**. The Nurses' Health Studies are supported by NIH grants CA 65725, CA87969, CA49449, CA67262, CA50385 and 5UO1CA098233. The **CTS** was initially supported by the California Breast Cancer Act of 1993 and the California Breast Cancer Research Fund (contract 97-10500) and is currently funded through the National Institutes of Health (R01 CA77398). Collection of cancer incidence data was supported by the California Department of Public Health as part of the statewide cancer reporting program mandated by California Health and Safety Code Section 103885. HAC receives support from the Lon V Smith Foundation (LVS39420). The CTS Steering Committee includes Leslie Bernstein, Susan Neuhausen, James Lacey, Sophia Wang, Huiyan Ma, Yani Lu, and Jessica Clague DeHart at the Beckman Research Institute of City of Hope, Dennis Deapen, Rich Pinder, Eunjung Lee, and Fred Schumacher at the University of Southern California,

Pam Horn-Ross, Peggy Reynolds, Christina Clarke Dur and David Nelson at the Cancer Prevention Institute of California, and Hoda Anton-Culver, Argyrios Ziogas, and Hannah Park at the University of California Irvine. The **CGPS** was supported by the Chief Physician Johan Boserup and Lise Boserup Fund, the Danish Medical Research Council and Herlev Hospital. The CGPS thanks the staff and participants of the Copenhagen General Population Study, and Dorthe Uldall Andersen, Maria Birna Arnadottir, Anne Bank, Dorthe Kjeldgård Hansen for excellent technical assistance. The **CNIO-BCS** was supported by the Genome Spain Foundation, the Red Temática de Investigación Cooperativa en Cáncer and grants from the Asociación Española Contra el Cáncer and the Fondo de Investigación Sanitario (PI11/00923 and PI081120). The Human Genotyping-CEGEN Unit (CNIO) is supported by the Instituto de Salud Carlos III. We thank Guillermo Pita, Charo Alonso, Daniel Herrero, Nuria Álvarez, Pilar Zamora, Primitiva Menendez and the Human Genotyping-CEGEN Unit (CNIO). The **DFBBS** GWAS was funded by The Netherlands Organisation for Scientific Research (NWO) as part of a ZonMw/VIDI grant number 91756341. We thank Margreet Ausems, Christi van Asperen, Senno Verhoef, and Rogier van Oldenburg for providing samples from their Clinical Genetic centers. The **ESTHER** study was supported by a grant from the Baden Württemberg Ministry of Science, Research and Arts. Additional cases were recruited in the context of the VERDI study, which was supported by a grant from the German Cancer Aid (Deutsche Krebshilfe). We thank Hartwig Ziegler, Sonja Wolf and Volker Hermann. The **GC-HBOC** was supported by Deutsche Krebshilfe (107 352). We thank Heide Hellebrand, Stefanie Engert, Prof. Dr. Norbert Arnold, Dr. Sabine Preissler-Adams, Dr. Monika Mareeva-Varon, Dr. Dieter Niederacher, Prof. Dr. Brigitte Schlegelberger and Dr. Clemens Mül. The **GENICA** was funded by the Federal Ministry of Education and Research (BMBF) Germany grants 01KW9975/5, 01KW9976/8, 01KW9977/0 and 01KW0114, the Robert Bosch Foundation, Stuttgart, Deutsches Krebsforschungszentrum (DKFZ), Heidelberg, the Institute for Prevention and Occupational Medicine of the German Social Accident Insurance, Institute of the Ruhr University Bochum (IPA), Bochum, as well as the Department of Internal Medicine, Evangelische Kliniken Bonn gGmbH, Johanniter Krankenhaus, Bonn, Germany. The **HEBCS** was supported by the Helsinki University Central Hospital Research Fund, Academy of Finland (266528), the Finnish Cancer Society, The Nordic Cancer Union and the Sigrid Juselius Foundation. HEBCS would like to thank Drs. Tuomas Heikkinen and Karl von Smitten and RN Irja Erkkilä for their help with the HEBCS data and samples. The population allele and genotype frequencies for controls for the HEBCS GWAS were obtained from the data source funded by the Nordic Center of Excellence in Disease Genetics based on samples regionally selected from Finland, Sweden and Denmark. The **HERPACC** was supported by a Grant-in-Aid for Scientific Research on Priority Areas from the Ministry of Education, Science, Sports, Culture and Technology of Japan, by a Grant-in-Aid for the Third Term Comprehensive 10-Year Strategy for Cancer Control from Ministry Health, Labour and Welfare of Japan, by Health and Labour Sciences Research Grants for Research on Applying Health Technology from Ministry Health, Labour and Welfare of Japan, by National Cancer Center Research and Development Fund and by a grant from Takeda Science Foundation. The **HMBCS** was supported by a grant from the Friends of Hannover Medical School and by the Rudolf Bartling Foundation. We thank Peter Hillemanns, Hans Christiansen and Johann H. Karstens. Financial support for **KARBAC** was provided through the regional agreement on medical training and clinical research (ALF) between Stockholm County Council and Karolinska Institutet, the Swedish Cancer Society, The Gustav V Jubilee foundation and Bert von Kantzows foundation. The **KBCP** was financially supported by the special Government Funding (EVO) of Kuopio University Hospital grants, Cancer Fund of North Savo, the Finnish Cancer Organizations, and by the strategic funding of the University of Eastern Finland. We thank Eija

Myöhänen and Helena Kemiläinen. **kConFab** is supported by a grant from the National Breast Cancer Foundation, and previously by the National Health and Medical Research Council (NHMRC), the Queensland Cancer Fund, the Cancer Councils of New South Wales, Victoria, Tasmania and South Australia, and the Cancer Foundation of Western Australia. GCT is supported by the NHMRC. We wish to thank Heather Thorne, Eveline Niedermayr, all the kConFab research nurses and staff, the heads and staff of the Family Cancer Clinics, and the Clinical Follow Up Study (which has received funding from the NHMRC, the National Breast Cancer Foundation, Cancer Australia, and the National Institute of Health (USA)) for their contributions to this resource, and the many families who contribute to kConFab. Financial support for the **AOCS** was provided by the United States Army Medical Research and Materiel Command [DAMD17-01-1-0729], the Cancer Council of Tasmania and Cancer Foundation of Western Australia and the NHMRC [199600]. We thank the AOCS Management Group (D Bowtell, G Chenevix-Trench, A deFazio, D Gertig, A Green, P Webb) and the ACS Management Group (A Green, P Parsons, N Hayward, P Webb, D Whiteman). **LAABC** is supported by grants (1RB-0287, 3PB-0102, 5PB-0018, 10PB-0098) from the California Breast Cancer Research Program. Incident breast cancer cases were collected by the USC Cancer Surveillance Program (CSP) which is supported under subcontract by the California Department of Health. The CSP is also part of the National Cancer Institute's Division of Cancer Prevention and Control Surveillance, Epidemiology, and End Results Program, under contract number N01CN25403. We thank all the study participants and the entire data collection team, especially Annie Fung and June Yashiki. **pKARMA** study was supported by Märit and Hans Rausings Initiative Against Breast Cancer and Cancer Risk Prediction Center, a Linneus Centre (contract 70867902) financed by the Swedish Research Council. **LMBC** is supported by the 'Stichting tegen Kanker' (232-2008 and 196-2010). Diether Lambrechts is supported by the FWO and the KULPFV/10/016-SymBioSysII. We thank Gilian Peuteman, Dominiek Smeets, Thomas Van Brussel and Kathleen Corthouts. The **MARIE** study was supported by the Deutsche Krebshilfe e.V. [70-2892-BR I, 106332, 108253, 108419], the Hamburg Cancer Society, the German Cancer Research Center and the Federal Ministry of Education and Research (BMBF) Germany [01KH0402]. MARIE would like to thank Alina Vrieling, Sabine Behrens, Ursula Eilber, Muhabbet Celik, Stefan Nickels and Lars Beckmann, Thomas Illig, Kirsten Mittelstraß for their valuable contributions to analysis and generation of the GWAS data, and S. Behrens, U. Eilber, and B. Kaspereit for their excellent technical assistance. **MBCSG** is supported by grants from the Italian Association for Cancer Research (AIRC) and by funds from the Italian citizens who allocated the 5/1000 share of their tax payment in support of the Fondazione IRCCS Istituto Nazionale Tumori, according to Italian laws (INT-Institutional strategic projects "5x1000"). We thank, Bernard Peissel and Daniela Zaffaroni of the Fondazione IRCCS Istituto Nazionale dei Tumori (INT), Bernardo Bonanni Monica Barile and Irene Feroce of the Istituto Europeo di Oncologia (IEO), and the personnel of the Cogentech Cancer Genetic Test Laboratory. The **MCBCS** was supported by the NIH grants CA116167, CA176785 an NIH Specialized Program of Research Excellence (SPORE) in Breast Cancer [CA116201], and the Breast Cancer Research Foundation and a generous gift from the David F. and Margaret T. Grohne Family Foundation. MCBCS would like to thank Curtis Olswold, Xianshu Wang, and Seth Slettedahl. .. **MCCS** cohort recruitment was funded by VicHealth and Cancer Council Victoria. The MCCS was further supported by Australian NHMRC grants 209057, 251553 and 504711 and by infrastructure provided by Cancer Council Victoria. The **MEC** was support by NIH grants CA63464, CA54281, CA098758 and CA132839. The work of **MTLGBCS** was supported by the Quebec Breast Cancer Foundation, the Canadian Institutes of Health Research for the "CIHR Team in Familial Risks of Breast Cancer" program – grant # CRN-87521 and the Ministry of Economic

Development, Innovation and Export Trade – grant # PSR-SIIRI-701. This work was also supported by the Government of Canada through Genome Canada and the Canadian Institutes of Health Research, and the Ministère de l'Économie, Innovation et Exportation du Québec through Genome Québec. We would like to thank Martine Tranchant (CHU de Québec Research Center), Marie-France Valois, Annie Turgeon and Lea Heguy (McGill University Health Center, Royal Victoria Hospital; McGill University) for DNA extraction, sample management and skillful technical assistance. J.S. is Chairholder of the Canada Research Chair in Oncogenetics. **MYBRCA** is funded by research grants from the Malaysian Ministry of Science, Technology and Innovation (MOSTI), Malaysian Ministry of Higher Education (UM.C/HIR/MOHE/06) and Cancer Research Initiatives Foundation (CARIF). Additional controls were recruited by the Singapore Eye Research Institute, which was supported by a grant from the Biomedical Research Council (BMRC08/1/35/19/550), Singapore and the National medical Research Council, Singapore (NMRC/CG/SERI/2010). We thank Phuah Sze Yee, Peter Kang, Kang In Nee, Kavitta Sivanandan, Shivaani Mariapun, Yoon Sook-Yee, Daphne Lee, Teh Yew Ching and Nur Aishah Mohd Taib for DNA Extraction and patient recruitment. The **NBCS** was supported by grants from the Norwegian Research council, 155218/V40, 175240/S10 to ALBD, FUGE-NFR 181600/V11 to VNK and a Swizz Bridge Award to ALBD. The **NBHS** was supported by NIH grant R01CA100374. Biological sample preparation was conducted the Survey and Biospecimen Shared Resource, which is supported by P30 CA68485. We thank study participants and research staff for their contributions and commitment to this study. The **OBCS** was supported by research grants from the Finnish Cancer Foundation, the Academy of Finland (grant number 250083, 122715 and Center of Excellence grant number 251314), the Finnish Cancer Foundation, the Sigrid Juselius Foundation, the University of Oulu, the University of Oulu Support Foundation and the special Governmental EVO funds for Oulu University Hospital-based research activities. We thank Saila Kauppila, Meeri Otsukka and Kari Mononen. The Ontario Familial Breast Cancer Registry (**OFBCR**) was supported by grant UM1 CA164920 from the National Cancer Institute (USA). The content of this manuscript does not necessarily reflect the views or policies of the National Cancer Institute or any of the collaborating centers in the Breast Cancer Family Registry (BCFR), nor does mention of trade names, commercial products, or organizations imply endorsement by the USA Government or the BCFR. The **ORIGO** study was supported by the Dutch Cancer Society (RUL 1997-1505) and the Biobanking and Biomolecular Resources Research Infrastructure (BBMRI-NL CP16). We thank E. Krol-Warmerdam, and J. Blom for patient accrual, administering questionnaires, and managing clinical information. The LUMC survival data were retrieved from the Leiden hospital-based cancer registry system (ONCDOC) with the help of Dr. J. Molenaar. The **PBCS** was funded by Intramural Research Funds of the National Cancer Institute, Department of Health and Human Services, USA. Louise Brinton, Mark Sherman, Neonila Szeszenia-Dabrowska, Beata Peplonska, Witold Zatonski, Pei Chao, Michael Stagner. The **RBCS** was funded by the Dutch Cancer Society (DDHK 2004-3124, DDHK 2009-4318). RBCS would like to thank Petra Bos, Jannet Blom, Ellen Crepin, Anja Nieuwlaat, Annette Heemskerk and the Erasmus MC Family Cancer Clinic. The **SASBAC** study was supported by funding from the Agency for Science, Technology and Research of Singapore (A\*STAR), the US National Institute of Health (NIH) and the Susan G. Komen Breast Cancer Foundation. The **SBCGS** was supported primarily by NIH grants R01CA64277, R01CA148667, and R37CA70867. Biological sample preparation was conducted the Survey and Biospecimen Shared Resource, which is supported by P30 CA68485. The scientific development and funding of this project were, in part, supported by the Genetic Associations and Mechanisms in Oncology (GAME-ON) Network U19 CA148065. We thank study participants and research staff for their contributions and commitment to this study. The **SBCS** was supported by

Yorkshire Cancer Research S295, S299, S305PA and Sheffield Experimental Cancer Medicine Centre. We thank Sue Higham, Helen Cramp, Ian Brock, Sabapathy Balasubramanian and Dan Connley. **SEARCH** was funded by a programme grant from Cancer Research UK [C490/A10124] and supported by the UK National Institute for Health Research Biomedical Research Centre at the University of Cambridge. We thank the SEARCH and EPIC-Norfolk teams for their support. AMD has been supported by Cancer Research UK grant [C8197/A10865] and by the Joseph Mitchell Fund. The **SCCS** is supported by a grant from the National Institutes of Health (R01 CA092447). Data on SCCS cancer cases used in this publication were provided by the Alabama Statewide Cancer Registry; Kentucky Cancer Registry, Lexington, KY; Tennessee Department of Health, Office of Cancer Surveillance; Florida Cancer Data System; North Carolina Central Cancer Registry, North Carolina Division of Public Health; Georgia Comprehensive Cancer Registry; Louisiana Tumor Registry; Mississippi Cancer Registry; South Carolina Central Cancer Registry; Virginia Department of Health, Virginia Cancer Registry; Arkansas Department of Health, Cancer Registry, 4815 W. Markham, Little Rock, AR 72205. The Arkansas Central Cancer Registry is fully funded by a grant from National Program of Cancer Registries, Centers for Disease Control and Prevention (CDC). Data on SCCS cancer cases from Mississippi were collected by the Mississippi Cancer Registry which participates in the National Program of Cancer Registries (NPCR) of the Centers for Disease Control and Prevention (CDC). The contents of this publication are solely the responsibility of the authors and do not necessarily represent the official views of the CDC or the Mississippi Cancer Registry. **SEBCS** was supported by the BRL (Basic Research Laboratory) program through the National Research Foundation of Korea funded by the Ministry of Education, Science and Technology (2012-0000347). **SGBCC** is funded by the National Medical Research Council start-up Grant and Centre Grant (NMRC/CG/NCIS /2010). The study would like to thank the participants and research coordinator Kimberley Chua. Additional controls were recruited by the Singapore Consortium of Cohort Studies-Multi-ethnic cohort (SCCS-MEC), which was funded by the Biomedical Research Council, grant number: 05/1/21/19/425. **SKDKFZS** is supported by the DKFZ. We thank all study participants, clinicians, family doctors, researchers and technicians for their contributions and commitment to this study. The **SZBCS** was supported by Grant PBZ\_KBN\_122/P05/2001 and PBZ-KBN-042/P05/2004. The **TBCS** was funded by The National Cancer Institute Thailand. The **TNBCC** was supported by: a Specialized Program of Research Excellence (SPORE) in Breast Cancer (CA116201), a grant from the Breast Cancer Research Foundation, a generous gift from the David F. and Margaret T. Grohne Family Foundation, the Stefanie Spielman Breast Cancer fund and the OSU Comprehensive Cancer Center, the Hellenic Cooperative Oncology Group research grant (HR R\_BG/04) and the Greek General Secretary for Research and Technology (GSRT) Program, Research Excellence II, the European Union (European Social Fund – ESF), and Greek national funds through the Operational Program "Education and Lifelong Learning" of the National Strategic Reference Framework (NSRF) - ARISTEIA. We thank Curtis Olswold, Xianshu Wang, and Seth Slettedahl from Mayo Clinic for genotyping and statistical support for TNBCC. Robert Pilarski and Charles Shapiro were instrumental in the formation of the OSU Breast Cancer Tissue Bank. We thank the Human Genetics Sample Bank for processing of samples and providing OSU Columbus area control samples. The **TWBCS** is supported by the Taiwan Biobank project of the Institute of Biomedical Sciences, Academia Sinica, Taiwan. The **UKBGS** is funded by Breakthrough Breast Cancer and the Institute of Cancer Research (ICR), London. ICR acknowledges NHS funding to the NIHR Biomedical Research Centre. We thank Breakthrough Breast Cancer and the Institute of Cancer Research for support and funding of the Breakthrough Generations Study, and the study participants, study staff, and the doctors, nurses and other health



care providers and health information sources who have contributed to the study. We acknowledge NHS funding to the Royal Marsden/ICR NIHR Biomedical Research Centre.

### **The Breast and Ovarian Cancer Susceptibility (BOCS) Study**

The Breast and Ovarian Cancer Susceptibility (BOCS) Study includes the following clinical collaborators: Z. Miedzybrodzka (University of Aberdeen and North of Scotland Clinical Genetics Service, Aberdeen), P. J. Morrison (Northern Ireland Regional Genetics Service, Belfast), K-R. Ong (West Midlands Regional Genetics Service, Birmingham), A. Donaldson (South Western Regional Genetics Service, Bristol), M. Tischkowitz (East Anglian Regional Genetics Service, Cambridge), A. Fryer (Clinical Genetics, Countess of Chester Hospital, Chester), J. Berg (Human Genetics, University of Dundee, Dundee), M. Porteous (South East of Scotland Clinical Genetics Service, Edinburgh), C. Brewer (Peninsula Regional Genetics Service, Exeter), R. Davidson (West of Scotland Regional Genetics Service, Glasgow), A. Kumar (North East Thames Regional Genetics Service, Great Ormond Street Hospital, London), A. Shaw (South East Thames Regional Genetics Service, Guy's Hospital, London), A.F. Brady (North West Thames Regional Genetics Service, Kennedy-Galton Centre, London), J. Adlard (Yorkshire Regional Genetics Service, Leeds), J. Barwell (Leicestershire Genetics Centre, Leicester), L. Greenhalgh (Merseyside and Cheshire Clinical Genetics Service, Liverpool), G. Evans (Genetic Medicine, Manchester Academic Health Science Centre, Manchester), F. Laloo (Regional Genetics Service, St Mary's Hospital, Manchester), A. Henderson (Northern Genetics Service, Newcastle), N. Shannon (Nottingham Regional Genetics Service, Nottingham), L. Walker (Oxford Regional Genetics Service, Oxford).

### **Kathleen Cuningham Foundation Consortium for research into Familial Breast cancer (kConFab):**

Morteza Aghmesheh, David Amor, Lesley Andrews, Yolanda Antill, Shane Armitage, Leanne Arnold, Rosemary Balleine, Agnes Bankier, Patti Bastick, Jonathan Beesley, John Beilby, Barbara Bennett, Ian Bennett, Geoffrey Berry, Anneke Blackburn, Michael Bogwitz, Meagan Brennan, Melissa Brown, Michael Buckley, Matthew Burgess, Jo Burke, Phyllis Butow, Keith Byron, David Callen, Ian Campbell, Deepa Chauhan, Manisha Chauhan, Georgia Chenevix-Trench, Alice Christian, Christine Clarke, Alison Colley, Dick Cotton, Ashley Crook, James Cui, Bronwyn Culling, Margaret Cummings, Sarah-Jane Dawson, Anna deFazio, Martin Delatycki, Rebecca Dickson, Joanne Dixon, Alexander Dobrovic, Tracy Dudding, Ted Edkins, Stacey Edwards, Maurice Eisenbruch, Gelareh Farshid, Susan Fawcett, Andrew Fellows, Georgina Fenton, Michael Field, Frank Firgaira, James Flanagan, Jean Fleming, Peter Fong, John Forbes, Stephen Fox, Juliet French, Michael Friedlander, Clara Gaff, Mac Gardner, Mike Gattas, Peter George, Graham Giles, Grantley Gill, Jack Goldblatt, Sian Greening, Scott Grist, Eric Haan, Kate Hardie, Marion Harris, Stewart Hart, Nick Hayward, Sue Healey, Louise Heiniger, John Hopper, Evelyn Humphrey, Clare Hunt, Paul James, Mark Jenkins, Alison Jones, Rick Kefford, Alexa Kidd, Belinda Kiely, Judy Kirk, Jessica Koehler, James Kollias, Serguei Kovalenko, Sunil Lakhani, Amanda Leaming, Jennifer Leary, Jacqueline Lim, Geoff Lindeman, Lara Lipton, Liz Lobb, Graham Mann, Deborah Marsh, Sue Anne McLachlan, Bettina Meiser, Cliff Meldrum, Roger Milne, Gillian Mitchell, Beth Newman, Eveline Niedermayr, Sophie Nightingale, Shona O'Connell, Imelda O'Loughlin, Richard Osborne, Nick Pachter, Briony Patterson, Lester Peters, Kelly Phillips, Melanie Price, Lynne Purser, Tony Reeve, Jeanne Reeve, Robert Richards, Edwina Rickard, Bridget Robinson

Barney Rudzki, Mona Saleh, Elizabeth Salisbury, Joe Sambrook, Christobel Saunders, Jodi Saunus, Robyn Sayer, Elizabeth Scott, Rodney Scott, Clare Scott, Ram Seshadri, Adrienne Sexton, Raghwa Sharma, Andrew Shelling, Peter Simpson, Melissa Southey, Amanda Spurdle, Graeme Suthers, Pamela Sykes, Margaret Tassell, Donna Taylor, Jessica Taylor, Benjamin Thierry, Susan Thomas, Ella Thompson, Heather Thorne, Sharron Townshend, Alison Trainer, Lan Tran, Kathy Tucker, Janet Tyler, Jane Visvader, Logan Walker, Ian Walpole, Robin Ward, Paul Waring, Bev Warner, Graham Warren, Rachael Williams, Judy Wilson, Ingrid Winship, Kathy Wu, Mary Ann Young

#### **Australian Ovarian Cancer Study (AOCS Management Group):**

D Bowtell (Peter MacCallum Cancer Centre), G Chenevix-Trench, A Green, P Webb (QIMRBerghofer), A deFazio (Westmead Institute for Cancer Research, WMI), D Gertig (Victorian Cervical Cytology Registry)

#### **The GENICA Network**

The GENICA Network: Dr. Margarete Fischer-Bosch-Institute of Clinical Pharmacology, Stuttgart, and University of Tübingen, Germany [HB, Wing-Yee Lo, Christina Justenhoven], German Cancer Consortium (DKTK) and German Cancer Research Center (DKFZ) [HB], Department of Internal Medicine, Evangelische Kliniken Bonn gGmbH, Johanniter Krankenhaus, Bonn, Germany [Yon-Dschun Ko, Christian Baisch], Institute of Pathology, University of Bonn, Germany [Hans-Peter Fischer], Molecular Genetics of Breast Cancer, Deutsches Krebsforschungszentrum (DKFZ), Heidelberg, Germany [UH], Institute for Prevention and Occupational Medicine of the German Social Accident Insurance, Institute of the Ruhr University Bochum (IPA), Bochum, Germany [TB, Beate Pesch, Sylvia Rabstein, Anne Lotz]; and Institute of Occupational Medicine and Maritime Medicine, University Medical Center Hamburg-Eppendorf, Germany [Volker Harth]

#### **The Norwegian Breast Cancer Study (NBCS)**

NBCS includes the following clinical collaborators: Dr. Kristine Kleivi, PhD (K.G. Jebsen Centre for Breast Cancer Research, Institute of Clinical Medicine, University of Oslo, Oslo, Norway and Department of Research, Vestre Viken, Drammen, Norway), Dr. Lars Ottestad, MD (Department of Genetics, Institute for Cancer Research, Oslo University Hospital Radiumhospitalet, Oslo, Norway), Prof. Em. Rolf Kåresen, MD (Department of Oncology, Oslo University Hospital and Faculty of Medicine, University of Oslo, Oslo, Norway), Dr. Anita Langerød, PhD (Department of Genetics, Institute for Cancer Research, Oslo University Hospital Radiumhospitalet, Oslo, Norway), Dr. Ellen Schlichting, MD (Department for Breast and Endocrine Surgery, Oslo University Hospital Ullevaal, Oslo, Norway), Dr. Marit Muri Holmen, MD (Department of Radiology and Nuclear Medicine, Oslo University Hospital, Oslo, Norway), Prof. Toril Sauer, MD (Department of Pathology at Akershus University hospital, Lørenskog, Norway), Dr. Vilde Haakensen, MD (Department of Genetics, Institute for Cancer Research, Oslo University Hospital Radiumhospitalet, Oslo, Norway), Dr. Olav Engebråten, MD (Institute for Clinical Medicine, Faculty of Medicine, University of Oslo and Department of Oncology, Oslo University Hospital, Oslo, Norway), Prof. Bjørn Naume, MD (Division of Cancer Medicine and Radiotherapy, Department of Oncology, Oslo University Hospital Radiumhospitalet, Oslo, Norway), Dr. Cecile E. Kiserud, MD (National Advisory Unit on Late Effects after Cancer Treatment, Department of Oncology, Oslo University Hospital, Oslo, Norway and Department of

Oncology, Oslo University Hospital, Oslo, Norway), Dr. Kristin V. Reinertsen, MD (National Advisory Unit on Late Effects after Cancer Treatment, Department of Oncology, Oslo University Hospital, Oslo, Norway and Department of Oncology, Oslo University Hospital, Oslo, Norway), Assoc. Prof. Åslaug Helland, MD (Department of Genetics, Institute for Cancer Research and Department of Oncology, Oslo University Hospital Radiumhospitalet, Oslo, Norway), Dr. Margit Riis, MD (Department of Breast- and Endocrine Surgery, Oslo University Hospital, Ullevål, Oslo, Norway), Dr. Ida Bukholm, MD (Department of Breast-Endocrine Surgery, Akershus University Hospital, Oslo, Norway and Department of Oncology, Division of Cancer Medicine, Surgery and Transplantation, Oslo University Hospital, Oslo, Norway), Prof. Per Eystein Lønning, MD (Section of Oncology, Institute of Medicine, University of Bergen and Department of Oncology, Haukeland University Hospital, Bergen, Norway), Prof. Anne-Lise Børresen-Dale, PhD (Department of Genetics, Institute for Cancer Research, Oslo University Hospital Radiumhospitalet, Oslo, Norway and Institute of Clinical Medicine, Faculty of Medicine, University of Oslo, Norway).

## References

1. Corradin, O. *et al.* Combinatorial effects of multiple enhancer variants in linkage disequilibrium dictate levels of gene expression to confer susceptibility to common traits. *Genome Res* **24**, 1-13 (2014).
2. Hnisz, D. *et al.* Super-enhancers in the control of cell identity and disease. *Cell* **155**, 934-47 (2013).
3. Michailidou, K. *et al.* Large-scale genotyping identifies 41 new loci associated with breast cancer risk. *Nat Genet* **45**, 353-61 (2013).
4. Garcia-Closas, M. *et al.* Genome-wide association studies identify four ER negative-specific breast cancer risk loci. *Nat Genet* **45**, 392-8 (2013).
5. Siddiq, A. *et al.* A meta-analysis of genome-wide association studies of breast cancer identifies two novel susceptibility loci at 6q14 and 20q11. *Hum Mol Genet* **21**, 5373-84 (2012).
6. Ahsan, H. *et al.* A genome-wide association study of early-onset breast cancer identifies PFKM as a novel breast cancer gene and supports a common genetic spectrum for breast cancer at any age. *Cancer Epidemiol Biomarkers Prev* **23**, 658-69 (2014).
7. Haiman, C.A. *et al.* A common variant at the TERT-CLPTM1L locus is associated with estrogen receptor-negative breast cancer. *Nat Genet* **43**, 1210-4 (2011).
8. Stevens, K.N. *et al.* 19p13.1 is a triple-negative-specific breast cancer susceptibility locus. *Cancer Res* **72**, 1795-803 (2012).
9. Gudbjartsson, D.F. *et al.* Many sequence variants affecting diversity of adult human height. *Nat Genet* **40**, 609-15 (2008).
